# Supplementary material
Source: HighWire-hosted journal article supplement (https://gut.bmj.com/content/70/8/1538)
Supplement: inline-supplementary-material-2 [file inline-supplementary-material-2.xlsx]

## Sheet: Supplementary Table 1
Online Supplementary Table S1. Study cohorts included the individual GWAS, meta-analyses, and follow up.
Cohort	Phenotype	N	Age, mean (±SD)	Sex, Female%	BMI, mean (±SD)
23andMe	HEM	174,785	58.02 (14.33)	0.589	27.96 (5.95)
	CTRL	228,060	49.08 (17.02)	0.547	27.23 (5.97)
	P		< 2.2E-16	< 2.2E-16	< 2.2E-16
UKBB	HEM	23,856	58.15 (±7.63)	0.51	27.79 (±5.48)
	CTRL	384,736	56.84 (±8.02)	0.543	27.27 (±5.15)
	P		<1.0E-04	<1.0E-04	<1.0E-04
EGCUT	HEM	6,927	57.84(16.21)	70.0%	-
	CTRL	30,299	53.56(17.03)	65.0%	-
	P		<1.0E-04	<1.0E-04	-
MGI	HEM	4,539	60.87 (13.01)	0.575	-
	CTRL	35,338	54.86 (16.51)	0.645	-
	P		< 2.2E-16	7.62e-10	-
GERA	HEM	8,813	77.80 (±10.33)	54.4%	26.98 (±5.34)
	CTRL	46,780	74.51 (±12.89)	61.6%	26.85 (±5.53)
	P		<1.0E-04	<1.0E-04	1.6E-02
German haemorrhids case-control dataset	HEM	1,144	61.29 (±11.39)	46.4%	26.64 (±4.51)
	CTRL	2,740	48.38 (±15.77)	50.9%	26.02 (±4.73)
	P		<1.0E-04	1.2E-02	1.2E-04
HUNT	HEM	977	60.22 (±14.88)	59.0%	27.00 (±4.37)
	CTRL	68,314	53.64 (±17.37)	52.9%	27.03 (±4.41)
	P		1.8E-04	<1.0E-04	8.4E-01
DBDS	HEM	1,754	47.44 (±11.03)	0.49	25.93 (±3.90)
	CTRL	54,643	39.33 (±12.66)	0.494	25.32 (±3.97)
	P		< 2.2E-16	0.7674	3.15E-10
DNPR	HEM	248,592	63.83 (±16.30)*	0.51	-
	CTRL	7,923,939	49.93 (±26.41)*	0.502	-
	P		< 2.2E-16	3.8E-15	-
German anal canal tissue samples	HEM	20	49.15 (±11.06 )	40.0%	27.54 (±6.8)
	CTRL	18	51.17 (±14.38)	50.0%	28.93 (±5.08)
	P		6.3E-01	7.7E-01	4.8E-01
