# Supplementary material
Source: HighWire-hosted journal article supplement (https://gut.bmj.com/content/70/8/1538)
Supplement: inline-supplementary-material-4 [file inline-supplementary-material-4.xlsx]

## Sheet: summary
Online Supplementary Table S3. Number of fine-mapped variants in 95% credible sets.
Size of 95% credible set	1	2-5	6-10	11-20	21-50	>50
Number of loci	6	19	11	18	26	22

## Sheet: details
Locus	SNP	CHR	BP	Posterior_probability
1	rs11585073	1	40275089	0.243938
1	rs12084017	1	40276348	0.243938
1	rs59766044	1	40282708	0.401525
1	rs11578451	1	40285773	0.0932837
2	rs17414785	1	95236421	0.0953714
2	rs11578225	1	95237528	0.0953714
2	rs11577484	1	95238755	0.0953714
2	rs17414905	1	95239080	0.0520791
2	rs17414947	1	95239533	0.0953714
2	rs11578548	1	95240643	0.0953714
2	rs11580446	1	95241697	0.0821776
2	rs61772753	1	95242022	0.0953714
2	rs72733523	1	95249105	0.0220702
2	rs72733524	1	95249106	0.0293339
2	rs11581918	1	95249408	0.0527094
2	rs11581919	1	95249432	0.0527094
2	rs61772759	1	95251579	0.0527094
2	rs61774560	1	95252976	0.0527094
3	rs145163454	1	169090748	0.617945
3	rs144737447	1	169160458	0.378568
4	rs10494852	1	204457786	0.00958976
4	rs11240751	1	204462050	0.0123881
4	rs4951075	1	204464446	0.0132927
4	rs4951076	1	204466176	0.0074396
4	rs10900593	1	204470096	0.0116532
4	rs11240753	1	204475513	0.00414886
4	rs4951389	1	204475834	0.00471121
4	rs7367519	1	204479176	0.00655801
4	rs12032733	1	204481209	0.00578402
4	rs12738124	1	204481368	0.00510412
4	rs4951077	1	204482262	0.00311196
4	rs11240756	1	204482594	0.00578402
4	rs4245736	1	204486205	0.00311196
4	rs4245737	1	204486242	0.0132927
4	rs1380576	1	204488278	0.00655801
4	rs12136299	1	204489143	0.00655801
4	rs4951393	1	204489557	0.0151716
4	rs61817958	1	204491612	0.0108965
4	rs12041075	1	204492153	0.0074396
4	rs7556655	1	204493844	0.00351888
4	rs4252677	1	204495253	0.0074396
4	rs4252685	1	204496856	0.00844425
4	rs4252686	1	204496895	0.0074396
4	rs4252687	1	204497335	0.00351888
4	rs4252694	1	204499056	0.0074396
4	rs4252708	1	204508159	0.0108965
4	rs4252717	1	204512100	0.00655801
4	rs4252718	1	204512195	0.0132927
4	rs2369244	1	204515299	0.0132927
4	rs2290855	1	204515863	0.00655801
4	rs2290854	1	204516025	0.00351888
4	rs1563828	1	204516577	0.0526447
4	rs4252734	1	204516947	0.00351888
4	rs4252736	1	204517097	0.0074396
4	rs4951396	1	204520209	0.0151716
4	rs12119098	1	204521577	0.00958976
4	rs10900596	1	204522457	0.00311196
4	rs10900597	1	204522489	0.0445876
4	rs1460036	1	204527379	0.00311196
4	rs12741351	1	204528256	0.0388893
4	rs11240758	1	204528651	0.00655801
4	rs11801289	1	204528969	0.00450659
4	rs12125533	1	204529302	0.0132927
4	rs12740680	1	204530505	0.00351888
4	rs4951397	1	204531567	0.0296348
4	rs4951398	1	204531876	0.0132927
4	rs4951080	1	204533284	0.119139
4	rs4951400	1	204534571	0.0445876
4	rs6681905	1	204535789	0.00398115
4	rs6679336	1	204536197	0.00311196
4	rs4951402	1	204539122	0.0388893
4	rs4951403	1	204539241	0.0074396
4	rs6594016	1	204539462	0.0182624
4	rs10900599	1	204541943	0.0339385
4	rs7541589	1	204542521	0.00351888
4	rs12039454	1	204542580	0.0151716
4	rs885012	1	204544001	0.00351888
4	rs11240760	1	204547268	0.00311196
4	rs35270244	1	204548416	0.0116532
4	rs10793765	1	204549375	0.0074396
4	rs10793766	1	204549496	0.00958976
4	rs10793767	1	204549564	0.0116532
4	rs12139477	1	204553104	0.0674278
4	rs12130686	1	204554057	0.00535282
4	rs12133735	1	204556836	0.00955999
4	rs12566957	1	204556958	0.00955999
4	rs10900600	1	204559707	0.0108965
4	rs6682208	1	204566183	0.0036557
4	rs11240761	1	204566700	0.00897098
4	rs6594019	1	204568610	0.00655801
5	rs2605091	1	219640305	0.100364
5	rs2605092	1	219640389	0.0330308
5	rs2605093	1	219640521	0.0289239
5	rs2820436	1	219640680	0.0330308
5	rs2605094	1	219640763	0.0330308
5	rs2605095	1	219641450	0.0289239
5	rs2605096	1	219641900	0.0253419
5	rs2605097	1	219642109	0.131485
5	rs1982499	1	219642518	0.0289239
5	rs2605098	1	219643649	0.0150187
5	rs2605100	1	219644224	0.0452194
5	rs2605101	1	219644496	0.0289239
5	rs2605102	1	219644993	0.0253419
5	rs2605103	1	219645192	0.0377422
5	rs2605104	1	219645197	0.04315
5	rs2605105	1	219646223	0.0289239
5	rs2605106	1	219648800	0.0377422
5	rs2791546	1	219648808	0.0493607
5	rs1340098	1	219649771	0.0767756
5	rs2605107	1	219650741	0.00973076
5	rs748273	1	219650950	0.0236173
5	rs2820430	1	219651779	0.0110269
5	rs1563352	1	219652795	0.00542023
5	rs1563353	1	219653026	0.0110269
5	rs1563355	1	219653101	0.00330074
5	rs2445127	1	219653685	0.00542023
5	rs2486895	1	219653704	0.00422496
5	rs2791551	1	219655031	0.00330074
5	rs1531093	1	219655838	0.00478407
5	rs1531094	1	219655876	0.00373331
5	rs1531096	1	219656701	0.0207737
5	rs1531097	1	219656760	0.00373331
5	rs2791549	1	219658003	0.00973076
6	rs77525005	2	20866699	0.101926
6	rs10205228	2	20866720	0.0859151
6	rs7594056	2	20867744	0.279283
6	rs7580188	2	20868125	0.11545
6	rs7589372	2	20868179	0.11545
6	rs35148785	2	20868414	0.137618
6	rs13013489	2	20870579	0.0813767
6	rs56353595	2	20871398	0.0683738
7	rs1153122	2	32533457	0.00428172
7	rs4019436	2	32603640	0.00490245
7	rs4952211	2	32611512	0.0290416
7	rs3769600	2	32616879	0.00658711
7	rs116617324	2	32622709	0.0256121
7	rs176401	2	32636511	0.0364014
7	rs176404	2	32638846	0.0138728
7	rs10182170	2	32704186	0.00371816
7	rs2366894	2	32713706	0.00371816
7	rs17428810	2	32736043	0.0314355
7	rs2069213	2	32743084	0.0155856
7	rs2249109	2	32750879	0.00527769
7	rs2710629	2	32765844	0.00841334
7	rs2754513	2	32782763	0.0108054
7	rs2754522	2	32801257	0.00538223
7	rs62136333	2	32803874	0.0176306
7	rs2710606	2	32811909	0.0174757
7	rs1901355	2	32835664	0.157517
7	rs13035097	2	32836362	0.218341
7	rs6723226	2	32849207	0.325179
7	rs35890136	2	32861027	0.00995975
8	rs1544655	2	36825137	0.0350794
8	rs4670570	2	36825932	0.237847
8	rs4670148	2	36826126	0.237847
8	rs4670149	2	36826170	0.272761
8	rs11124521	2	36826743	0.181135
9	rs10460504	2	45575110	0.299284
9	rs728327	2	45775995	0.668817
10	rs360804	2	62939397	0.00276768
10	rs360797	2	62942840	0.00190954
10	rs1906198	2	62946658	0.0218346
10	rs360800	2	62954326	0.00989426
10	rs11125942	2	62966758	0.00820527
10	rs2136737	2	62969310	0.00671153
10	rs9678329	2	62979759	0.00215979
10	rs4671450	2	62981869	0.00215979
10	rs4671050	2	62988169	0.00244422
10	rs7573756	2	62990637	0.00215979
10	rs34104251	2	62995183	0.0249631
10	rs3927201	2	63001335	0.00763419
10	rs10153716	2	63007059	0.0374314
10	rs7562149	2	63008414	0.0326847
10	rs13013218	2	63011671	0.0374314
10	rs1553832	2	63013515	0.0285561
10	rs9973612	2	63019815	0.0285561
10	rs12989754	2	63020970	0.0374314
10	rs4461246	2	63027671	0.016733
10	rs4671051	2	63032696	0.0837335
10	rs1828398	2	63034870	0.0726274
10	rs1022110	2	63046039	0.016733
10	rs7562734	2	63047973	0.0428917
10	rs11682530	2	63073194	0.016733
10	rs6545971	2	63074986	0.0413508
10	rs2421816	2	63075033	0.0249631
10	rs11893131	2	63079528	0.00590372
10	rs13418889	2	63079775	0.0237681
10	rs17027429	2	63079983	0.0272728
10	rs2080227	2	63081759	0.0444162
10	rs6545972	2	63084682	0.0237681
10	rs7567923	2	63085848	0.0191089
10	rs7557501	2	63086639	0.0272728
10	rs6545973	2	63089434	0.0218346
10	rs9789661	2	63089644	0.0313129
10	rs2058567	2	63091426	0.00671153
10	rs2430388	2	63106784	0.0086886
10	rs2539982	2	63111004	0.00457585
10	rs1420018	2	63112500	0.0146608
10	rs2215870	2	63132342	0.00403194
10	rs2539985	2	63134507	0.00989426
10	rs2710639	2	63138963	0.00171976
10	rs2539987	2	63142864	0.00190954
10	rs2710640	2	63144305	0.00355469
10	rs2710642	2	63149557	0.0207261
10	rs2539990	2	63170185	0.00178744
10	rs2710637	2	63173450	0.00519608
10	rs2058566	2	63179076	0.0128525
10	rs2539978	2	63195179	0.00171976
10	rs1468748	2	63204611	0.00707924
10	rs2710644	2	63248968	0.00590372
10	rs6705798	2	63259881	0.00403194
11	rs34338966	2	64892466	0.0822522
11	rs12614829	2	64893183	0.0922782
11	rs7596561	2	64894148	0.0372
11	rs71424129	2	64895167	0.0922782
11	rs34642907	2	64895731	0.0822522
11	rs34218958	2	64895903	0.0922782
11	rs11894737	2	64898662	0.0465691
11	rs34532102	2	64905182	0.103569
11	rs6759291	2	64909691	0.073346
11	rs6754136	2	64911801	0.0349224
11	rs13007087	2	64915276	0.0310133
11	rs6750285	2	64920032	0.0310133
11	rs13013483	2	64923311	0.00774235
11	rs1968179	2	64929212	0.0349224
11	rs13026184	2	64930786	0.00866899
11	rs6735239	2	64931994	0.0527686
11	rs72814070	2	64935357	0.00971112
11	rs1558703	2	64938289	0.00866899
11	rs13016603	2	64941506	0.00618439
11	rs35636928	2	64942953	0.00774235
11	rs35862374	2	64953393	0.00618439
11	rs13031521	2	64957938	0.00691803
11	rs12994639	2	64959331	0.00691803
12	rs74445493	2	67874054	0.0516043
12	rs58909924	2	67880862	0.11175
12	rs114233333	2	67881931	0.0842064
12	rs75984732	2	67897842	0.0419267
12	rs76316246	2	67898111	0.0365321
12	rs72905801	2	67898999	0.0192683
12	rs2861709	2	67900116	0.139554
12	rs2163363	2	67901174	0.0277843
12	rs2163364	2	67901540	0.0297457
12	rs79994788	2	67909327	0.0297457
12	rs76794380	2	67909332	0.0297457
12	rs78133950	2	67909406	0.0318501
12	rs76290730	2	67910151	0.0297457
12	rs76307505	2	67910238	0.0318501
12	rs77274689	2	67910334	0.0297457
12	rs80194914	2	67911856	0.0277843
12	rs77481855	2	67913448	0.025956
12	rs77516753	2	67913713	0.0277843
12	rs79131920	2	67916332	0.0391337
12	rs80250779	2	67918089	0.0419267
12	rs79059272	2	67922634	0.0682068
13	rs12466812	2	112654009	0.0336981
13	rs6729037	2	112656777	0.0253633
13	rs1516629	2	112658779	0.0220198
13	rs2001444	2	112659538	0.0125688
13	rs17835605	2	112661106	0.0220198
13	rs55785997	2	112661447	0.0292283
13	rs113645544	2	112662040	0.0336981
13	rs79559916	2	112665080	0.0191261
13	rs17174870	2	112665201	0.0220198
13	rs55728465	2	112666096	0.0191261
13	rs55708724	2	112666922	0.0220198
13	rs12477716	2	112668644	0.0191261
13	rs7568632	2	112669950	0.0191261
13	rs1400321	2	112670046	0.00829476
13	rs58641606	2	112670732	0.0166205
13	rs7575552	2	112673634	0.0144499
13	rs80088736	2	112674805	0.0109377
13	rs867311	2	112677970	0.00829476
13	rs2001201	2	112678350	0.00952274
13	rs59650987	2	112678976	0.0109377
13	rs55972521	2	112680519	0.0109377
13	rs1400325	2	112680934	0.0109377
13	rs1400324	2	112681220	0.0109377
13	rs57640566	2	112684173	0.00722854
13	rs74562473	2	112684680	0.00952274
13	rs75508922	2	112688397	0.00722854
13	rs79433506	2	112695056	0.00829476
13	rs113415773	2	112695716	0.00630235
13	rs76852916	2	112701291	0.00829476
13	rs1113419	2	112707483	0.00722854
13	rs12470338	2	112709756	0.00952274
13	rs17175275	2	112712329	0.00722854
13	rs17175331	2	112712870	0.00722854
13	rs113494688	2	112717927	0.00952274
13	rs56272510	2	112727604	0.00691869
13	rs4434006	2	112728811	0.00829476
13	rs113629868	2	112738246	0.0109377
13	rs77290039	2	112741106	0.00829476
13	rs10207726	2	112744260	0.00622263
13	rs76944504	2	112745774	0.00952274
13	rs76514293	2	112751516	0.0109377
13	rs77226570	2	112751534	0.00952274
13	rs77702371	2	112753020	0.00952274
13	rs3811632	2	112754828	0.00622263
13	rs58065683	2	112756581	0.00952274
13	rs79464516	2	112757446	0.0109377
13	rs4521048	2	112757746	0.00952274
13	rs79058693	2	112758559	0.00722854
13	rs4528767	2	112759864	0.0109377
13	rs4278932	2	112761310	0.00829476
13	rs55766181	2	112766304	0.00952274
13	rs55799805	2	112766319	0.00952274
13	rs11884641	2	112767406	0.0144499
13	rs11884693	2	112767483	0.0144499
13	rs75313362	2	112767739	0.00722854
13	rs77781750	2	112767824	0.0125688
13	rs77306155	2	112767941	0.0125688
13	rs7563113	2	112768177	0.0125688
13	rs12469210	2	112768991	0.0125688
13	rs11887652	2	112769339	0.0090584
13	rs28377357	2	112769721	0.00622263
13	rs78116208	2	112769801	0.0109377
13	rs57116599	2	112770799	0.148086
13	rs6712080	2	112777441	0.00630235
13	rs55792453	2	112778389	0.00549743
13	rs6737989	2	112779449	0.00829476
13	rs55812028	2	112780969	0.0109377
14	rs1918878	2	145735762	0.00555562
14	rs1980383	2	145746350	0.00633181
14	rs1980382	2	145746593	0.00487761
14	rs1528189	2	145749279	0.00487761
14	rs1528188	2	145749357	0.00487761
14	rs1006923	2	145775399	0.0144263
14	rs12477111	2	145786540	0.00613268
14	rs12992411	2	145796032	0.00902083
14	rs6430076	2	145797185	0.0069704
14	rs13389190	2	145797389	0.00792726
14	rs13428423	2	145797575	0.00902083
14	rs2252654	2	145801113	0.0315131
14	rs2252383	2	145803003	0.0102714
14	rs12476764	2	145805218	0.00983571
14	rs78809153	2	145805251	0.0276261
14	rs13384504	2	145808513	0.0276261
14	rs1852686	2	145809250	0.00983571
14	rs12474485	2	145810833	0.00943812
14	rs1819055	2	145810894	0.0410743
14	rs12995180	2	145814198	0.0410743
14	rs7607110	2	145815262	0.0613808
14	rs7423637	2	145818064	0.0641356
14	rs1830318	2	145819803	0.029646
14	rs6747171	2	145819888	0.121261
14	rs6747275	2	145819922	0.0339367
14	rs35462154	2	145821133	0.0339367
14	rs1881409	2	145821520	0.0388715
14	rs1881410	2	145821717	0.0339367
14	rs1830320	2	145822380	0.0293684
14	rs13015800	2	145822655	0.00866658
14	rs12691704	2	145822778	0.00866658
14	rs6749506	2	145825390	0.0334065
14	rs6721988	2	145825928	0.0111689
14	rs10928241	2	145831428	0.0293684
14	rs957293	2	145833187	0.0293684
14	rs10206585	2	145836055	0.0227344
14	rs7604735	2	145839655	0.0380203
14	rs34372836	2	145840281	0.0380203
15	rs12464617	2	148576646	0.00753912
15	rs1424944	2	148578930	0.00753912
15	rs11889608	2	148579233	0.00753912
15	rs6760703	2	148583330	0.00852953
15	rs13013867	2	148584812	0.00965527
15	rs13025589	2	148586061	0.00852953
15	rs13026220	2	148586459	0.0020098
15	rs13025219	2	148589984	0.0114683
15	rs13004451	2	148593593	0.0114683
15	rs12469504	2	148596102	0.0109355
15	rs1424954	2	148600794	0.00753912
15	rs12053113	2	148601660	0.0130375
15	rs13028411	2	148609135	0.0114683
15	rs1014064	2	148612154	0.00666731
15	rs10803523	2	148615831	0.0100937
15	rs2113793	2	148623453	0.0058995
15	rs13000597	2	148626140	0.0100937
15	rs929939	2	148627528	0.00888885
15	rs1895693	2	148636993	0.0114683
15	rs11904758	2	148640108	0.00666731
15	rs7559714	2	148640768	0.0118069
15	rs7559925	2	148640930	0.0020098
15	rs6711673	2	148643259	0.00753912
15	rs13033696	2	148645327	0.00753912
15	rs1469210	2	148646742	0.00753912
15	rs2161984	2	148648486	0.00753912
15	rs2161983	2	148649386	0.0114683
15	rs13019809	2	148650473	0.0114683
15	rs1128919	2	148657117	0.00965527
15	rs723681	2	148668509	0.0020098
15	rs3768689	2	148669774	0.00753912
15	rs3768687	2	148672020	0.00753912
15	rs13026650	2	148674201	0.00852953
15	rs3764955	2	148674797	0.0020098
15	rs2303392	2	148680427	0.0100937
15	rs2059422	2	148690055	0.0148298
15	rs1345994	2	148695126	0.00753912
15	rs13033589	2	148702999	0.0130375
15	rs1531032	2	148703310	0.00852953
15	rs10460259	2	148704721	0.00852953
15	rs1030317	2	148704932	0.0130375
15	rs13006184	2	148706370	0.00226035
15	rs13012311	2	148707032	0.0168781
15	rs13027200	2	148709653	0.0020098
15	rs12104822	2	148710361	0.0148298
15	rs13034793	2	148710806	0.0130375
15	rs11888152	2	148715038	0.00753912
15	rs12463798	2	148716099	0.0130375
15	rs2307394	2	148716428	0.0148298
15	rs4972317	2	148718920	0.0130375
15	rs34539489	2	148722877	0.00852953
15	rs6729465	2	148723126	0.00852953
15	rs11901963	2	148726771	0.0130375
15	rs12469939	2	148732099	0.00226035
15	rs1020653	2	148732410	0.0130375
15	rs13027706	2	148732703	0.00852953
15	rs57679331	2	148737325	0.00753912
15	rs12990262	2	148737829	0.0148298
15	rs7594075	2	148739823	0.00852953
15	rs4972318	2	148740587	0.0130375
15	rs13004041	2	148741621	0.00226035
15	rs13031064	2	148741978	0.00852953
15	rs13003171	2	148748577	0.0020098
15	rs72855232	2	148748967	0.00254352
15	rs9789434	2	148749393	0.0114683
15	rs12463554	2	148751612	0.00226035
15	rs9789640	2	148753501	0.0114683
15	rs13008838	2	148754825	0.0130375
15	rs13035475	2	148754862	0.0130375
15	rs13014936	2	148755237	0.0130375
15	rs13022962	2	148756624	0.00783227
15	rs12053401	2	148756668	0.0130375
15	rs13028348	2	148757144	0.0114683
15	rs1598207	2	148757870	0.00852953
15	rs12476827	2	148759348	0.00254352
15	rs7425436	2	148759656	0.00462645
15	rs6729803	2	148760626	0.00249061
15	rs6729804	2	148760627	0.00249061
15	rs6430281	2	148762568	0.00965527
15	rs6430282	2	148762793	0.0168781
15	rs6724719	2	148764890	0.00965527
15	rs2382201	2	148765496	0.00254352
15	rs6732463	2	148766475	0.00965527
15	rs12997165	2	148768873	0.0168781
15	rs13032810	2	148770054	0.0148298
15	rs13033664	2	148770274	0.00322594
15	rs6746415	2	148771691	0.00965527
15	rs2168145	2	148773395	0.0168781
15	rs12989250	2	148776438	0.00753912
15	rs1975748	2	148776859	0.0148298
15	rs897172	2	148778272	0.0148298
15	rs1015096	2	148782358	0.0168781
15	rs11886876	2	148783807	0.0109355
15	rs13007770	2	148784324	0.0148298
15	rs4972320	2	148784570	0.00226035
15	rs4972321	2	148784984	0.0109355
15	rs7560425	2	148785312	0.00852953
15	rs13021605	2	148786336	0.00852953
15	rs13029038	2	148787308	0.00254352
15	rs13012455	2	148788236	0.00254352
15	rs4417662	2	148789386	0.00852953
15	rs2890915	2	148789543	0.00852953
15	rs11896010	2	148789730	0.00852953
15	rs12992412	2	148792665	0.00179818
15	rs12473564	2	148793730	0.00254352
15	rs12992231	2	148799710	0.00179818
15	rs12105411	2	148800730	0.00203292
15	rs12995413	2	148801652	0.00203292
15	rs10186643	2	148803587	0.00290452
15	rs13032786	2	148803672	0.00226035
16	rs56297666	2	160902023	0.00551868
16	rs34248629	2	160902497	0.00551868
16	rs877200	2	160903723	0.00646887
16	rs2175416	2	160904021	0.00646887
16	rs1511218	2	160906390	0.00646887
16	rs10929965	2	160906931	0.00758738
16	rs6719686	2	160908292	0.00758738
16	rs10929966	2	160908341	0.00758738
16	rs17831161	2	160909360	0.00646887
16	rs62175515	2	160909524	0.00758738
16	rs7563607	2	160910215	0.00758738
16	rs56293836	2	160910958	0.00646887
16	rs17831191	2	160911332	0.00646887
16	rs62175517	2	160911575	0.00646887
16	rs925410	2	160912652	0.00646887
16	rs6759924	2	160912747	0.004711
16	rs6759836	2	160912802	0.00551868
16	rs17831251	2	160914156	0.00646887
16	rs6707458	2	160914540	0.00646887
16	rs16844715	2	160915106	0.00758738
16	rs17241792	2	160915205	0.004711
16	rs17831329	2	160915819	0.004711
16	rs3749119	2	160919020	0.0432286
16	rs58354887	2	160927112	0.00551868
16	rs6744567	2	160933781	0.0170011
16	rs7593593	2	160933811	0.0170011
16	rs62175552	2	160937220	0.0144497
16	rs4520993	2	160937673	0.0200155
16	rs4520994	2	160937750	0.0170011
16	rs4292050	2	160940899	0.0327842
16	rs6739867	2	160942818	0.0200155
16	rs4363984	2	160943570	0.0200155
16	rs4637057	2	160950161	0.0235792
16	rs62175559	2	160955833	0.0235792
16	rs4233681	2	160960058	0.0860257
16	rs62177860	2	160960571	0.0277946
16	rs12987602	2	160960788	0.0860257
16	rs17216980	2	160960932	0.0144497
16	rs10497213	2	160963603	0.0364561
16	rs13009231	2	160964057	0.00551868
16	rs6731260	2	160977769	0.0386935
16	rs2124969	2	160989486	0.0755519
16	rs7567781	2	160999537	0.0755519
16	rs60908067	2	161004983	0.0638538
16	rs13001911	2	161020703	0.0104576
16	rs7589820	2	161027884	0.00551868
16	rs17218566	2	161054748	0.00890486
16	rs4665162	2	161060184	0.00646887
16	rs59019419	2	161061287	0.00890486
16	rs1870102	2	161070582	0.00646887
17	rs6433395	2	173943880	0.0407086
17	rs67719248	2	173948094	0.00831088
17	rs72905046	2	173948571	0.0112133
17	rs3769203	2	173955062	0.00324889
17	rs16861272	2	173960905	0.00324889
17	rs34681024	2	173982366	0.00371902
17	rs36103648	2	173985747	0.00351608
17	rs34014656	2	173989306	0.00371902
17	rs13020796	2	173990421	0.0471257
17	rs16861278	2	173992693	0.0471257
17	rs2278883	2	173996917	0.00425984
17	rs67683956	2	174002739	0.00642558
17	rs3769187	2	174004202	0.00401303
17	rs13017210	2	174008623	0.6953
17	rs17761169	2	174034099	0.0471257
17	rs34658268	2	174041982	0.0141831
17	rs55913048	2	174054206	0.00371902
17	rs3769161	2	174066475	0.00425984
18	rs847157	2	176962501	0.0637883
18	rs847156	2	176962561	0.0637883
18	rs847154	2	176962958	0.0637883
18	rs847153	2	176962989	0.0637883
18	rs711812	2	176964304	0.0779652
18	rs847151	2	176964904	0.0522188
18	rs711813	2	176966190	0.0637883
18	rs741610	2	176969206	0.0779652
18	rs711814	2	176969341	0.142842
18	rs847148	2	176970456	0.322776
19	rs1515866	2	190067064	0.0015611
19	rs2351631	2	190068470	0.00185544
19	rs142571446	2	190068870	0.0180132
19	rs10755002	2	190069176	0.0022078
19	rs17270980	2	190070890	0.0190507
19	rs13015183	2	190070927	0.0022078
19	rs16831217	2	190070983	0.017034
19	rs7599222	2	190073658	0.00171252
19	rs939160	2	190074622	0.0022078
19	rs6732534	2	190079156	0.00185544
19	rs1913892	2	190080984	0.00185544
19	rs114826780	2	190082597	0.0103475
19	rs16841601	2	190082747	0.0144131
19	rs1356161	2	190083141	0.00185544
19	rs2351633	2	190084791	0.0015611
19	rs10198505	2	190104983	0.0045214
19	rs4031918	2	190106007	0.00406882
19	rs10164448	2	190108891	0.00178539
19	rs2102874	2	190109425	0.0045214
19	rs1515867	2	190111412	0.0045214
19	rs2030293	2	190112458	0.00428893
19	rs870922	2	190113708	0.00329896
19	rs870921	2	190113745	0.00956683
19	rs10204942	2	190115961	0.00804497
19	rs7596033	2	190118235	0.00366299
19	rs7599676	2	190119066	0.00174536
19	rs7591652	2	190122574	0.00476696
19	rs4666773	2	190123256	0.0045214
19	rs1464262	2	190127123	0.00476696
19	rs9973614	2	190129604	0.00858516
19	rs1606931	2	190130694	0.00366299
19	rs1850122	2	190130976	0.0209685
19	rs6434335	2	190131182	0.00813399
19	rs1473999	2	190132854	0.00813399
19	rs10755003	2	190133932	0.00476696
19	rs10931409	2	190134275	0.0045214
19	rs4667275	2	190138684	0.0021464
19	rs76287931	2	190141143	0.0129005
19	rs78156759	2	190141718	0.0225493
19	rs2351634	2	190144159	0.0220241
19	rs75897057	2	190144880	0.0085004
19	rs73982009	2	190145173	0.0125345
19	rs16831319	2	190150205	0.0434912
19	rs939157	2	190151140	0.0225493
19	rs939159	2	190151221	0.0220241
19	rs4494782	2	190157357	0.00804497
19	rs148113645	2	190158743	0.00316772
19	rs58288282	2	190178034	0.00492407
19	rs2176649	2	190178839	0.0106059
19	rs2680630	2	190187457	0.00442021
19	rs2683019	2	190191290	0.00320541
19	rs2683011	2	190197517	0.00646126
19	rs56920210	2	190203950	0.00579408
19	rs77321529	2	190204800	0.0043534
19	rs73978612	2	190210152	0.00720826
19	rs79118748	2	190215468	0.00979496
19	rs78861577	2	190215681	0.0125345
19	rs77448694	2	190216205	0.0109323
19	rs114022205	2	190223717	0.00979496
19	rs73978617	2	190231883	0.0118543
19	rs78631812	2	190234621	0.0175566
19	rs79903972	2	190250925	0.015237
19	rs7556928	2	190251709	0.00290932
19	rs58796942	2	190252289	0.0140186
19	rs16831356	2	190257103	0.0208073
19	rs13405433	2	190260299	0.00324204
19	rs149780113	2	190260412	0.0103475
19	rs28545536	2	190260537	0.00324204
19	rs13035381	2	190265596	0.00269544
19	rs1520858	2	190271533	0.00442021
19	rs77945618	2	190276153	0.00407461
19	rs75399423	2	190276958	0.00407461
19	rs1520856	2	190276973	0.00269544
19	rs73978620	2	190278087	0.0208073
19	rs74704182	2	190280320	0.0267149
19	rs75971232	2	190284274	0.0220241
19	rs1851104	2	190294549	0.0021464
19	rs7563184	2	190296131	0.00231521
19	rs115233151	2	190296153	0.0282737
19	rs74542138	2	190308506	0.00502634
19	rs115256769	2	190310326	0.0355091
19	rs73978626	2	190310485	0.0252446
19	rs1520854	2	190310982	0.00499508
19	rs6738193	2	190313396	0.00499508
19	rs1992295	2	190313841	0.00462089
19	rs12693539	2	190318009	0.00427565
19	rs13015207	2	190320810	0.00462089
19	rs73978632	2	190321347	0.0238577
19	rs7574403	2	190321663	0.00462089
19	rs76926223	2	190322950	0.00621914
19	rs2351933	2	190323177	0.00514194
19	rs73978633	2	190325150	0.0282737
19	rs2304702	2	190327126	0.00427565
19	rs16831454	2	190329447	0.00395705
19	rs6434343	2	190332997	0.00395705
19	rs10166420	2	190336705	0.00339152
19	rs6747222	2	190340453	0.00314084
19	rs734859	2	190342069	0.00290932
19	rs114473932	2	190345807	0.00361577
19	rs11678414	2	190347630	0.00269544
19	rs893408	2	190350646	0.00176708
19	rs744556	2	190351066	0.00176708
19	rs12623394	2	190352703	0.00193919
19	rs1595749	2	190353770	0.00184601
19	rs143030753	2	190354297	0.0122401
19	rs12988143	2	190354514	0.0021385
19	rs2351934	2	190354798	0.00184601
19	rs2119069	2	190354871	0.00242485
19	rs10497703	2	190355355	0.00188709
19	rs80077412	2	190355887	0.0200049
19	rs1866605	2	190356197	0.0021464
19	rs4309611	2	190357006	0.00158902
19	rs10198663	2	190357442	0.00249783
19	rs35997606	2	190358689	0.00185927
20	rs2043989	2	191268293	0.00941032
20	rs6707846	2	191286516	0.00748167
20	rs4853509	2	191330786	0.0158579
20	rs4264585	2	191334031	0.00540718
20	rs7601745	2	191341366	0.00540718
20	rs12613365	2	191347310	0.00483324
20	rs6711006	2	191371217	0.00540718
20	rs4586658	2	191379268	0.0107117
20	rs13019278	2	191384924	0.00540718
20	rs7584794	2	191386158	0.0107117
20	rs7585173	2	191386594	0.0107117
20	rs10165897	2	191387612	0.0122007
20	rs4500977	2	191393787	0.00727629
20	rs4073873	2	191394583	0.00759365
20	rs4146923	2	191394715	0.00727629
20	rs12619560	2	191395646	0.00851215
20	rs12693578	2	191396188	0.00827222
20	rs12622496	2	191399013	0.0532165
20	rs12619125	2	191399201	0.0532165
20	rs55754136	2	191401425	0.0472374
20	rs4853718	2	191404964	0.0599807
20	rs55987230	2	191409274	0.0599807
20	rs34274882	2	191410795	0.0472374
20	rs34825614	2	191413863	0.0532165
20	rs13013848	2	191419442	0.0532165
20	rs12464923	2	191421830	0.0599807
20	rs36055519	2	191429380	0.0599807
20	rs12478437	2	191432415	0.0269913
20	rs34417560	2	191435716	0.0676366
20	rs12615925	2	191437902	0.0331311
20	rs6434400	2	191442468	0.0331311
20	rs7608180	2	191443403	0.0207828
20	rs12987797	2	191454544	0.0207828
20	rs4853720	2	191463602	0.0185176
20	rs12621493	2	191467149	0.0178934
20	rs13028201	2	191468706	0.0233362
21	rs829186	3	14818716	0.0111679
21	rs829187	3	14818787	0.0128268
21	rs829189	3	14821017	0.00763229
21	rs829190	3	14821162	0.00894636
21	rs1687287	3	14828111	0.0265549
21	rs1687289	3	14829826	0.0571806
21	rs294601	3	14832407	0.0524582
21	rs1689549	3	14837473	0.369695
21	rs729157	3	14839035	0.00505489
21	rs192676	3	14841602	0.111471
21	rs190902	3	14842095	0.139562
21	rs1159749	3	14849002	0.132866
21	rs10510432	3	14865367	0.00712073
21	rs60388387	3	14866331	0.00779308
22	rs1529544	3	53039455	0.0264952
22	rs4687694	3	53049047	0.0163242
22	rs2581778	3	53055311	0.0163242
22	rs2244552	3	53055522	0.0163242
22	rs9847710	3	53062661	0.309812
22	rs11709427	3	53068042	0.0703217
22	rs2564956	3	53070462	0.0898973
22	rs2581817	3	53071797	0.0898973
22	rs6808387	3	53079732	0.114994
22	rs12488768	3	53086234	0.0337864
22	rs13088455	3	53087482	0.055043
22	rs9831861	3	53088285	0.055043
22	rs4687697	3	53090490	0.0264952
22	rs6445558	3	53097660	0.0207905
22	rs6770152	3	53100214	0.0207905
23	rs34440469	3	70897294	0.00521651
23	rs1522551	3	70902653	0.0461583
23	rs2687195	3	70905581	0.00624632
23	rs1522552	3	70907252	0.119338
23	rs2699491	3	70909039	0.034725
23	rs2597301	3	70909494	0.170677
23	rs11926363	3	70913181	0.0103884
23	rs1522554	3	70913293	0.0245285
23	rs35270590	3	70914733	0.00521651
23	rs35109540	3	70914736	0.00442777
23	rs34341381	3	70914738	0.00442777
23	rs2597302	3	70917189	0.00725225
23	rs4676893	3	70917639	0.0492714
23	rs1018340	3	70918127	0.012322
23	rs1403202	3	70918938	0.012322
23	rs12054322	3	70919162	0.0146238
23	rs17007949	3	70920041	0.0146238
23	rs56254492	3	70920168	0.0119363
23	rs4499560	3	70920485	0.0245285
23	rs7626449	3	70921329	0.0141082
23	rs2687197	3	70922320	0.0119363
23	rs6776545	3	70923584	0.00376032
23	rs2687199	3	70924971	0.012322
23	rs13068175	3	70925604	0.0547934
23	rs1533834	3	70926988	0.0233714
23	rs34518676	3	70927382	0.0197415
23	rs2687201	3	70928930	0.0245285
23	rs2687202	3	70929983	0.00855797
23	rs34577575	3	70931081	0.0263313
23	rs35378923	3	70932586	0.0547934
23	rs2687203	3	70933568	0.119338
24	rs6438003	3	111453889	0.0489309
24	rs10212300	3	111464449	0.0135721
24	rs9870823	3	111465590	0.00790721
24	rs13069980	3	111466766	0.00790721
24	rs13074817	3	111467155	0.00946149
24	rs4284954	3	111468099	0.00946149
24	rs9834030	3	111469374	0.00946149
24	rs12496925	3	111470108	0.0113284
24	rs12496971	3	111470259	0.0113284
24	rs10934106	3	111470468	0.0113284
24	rs12490595	3	111470696	0.00463276
24	rs13079085	3	111471217	0.00946149
24	rs6764720	3	111476395	0.00388139
24	rs6438008	3	111477120	0.00790721
24	rs6792493	3	111477348	0.473398
24	rs10934107	3	111477636	0.00790721
24	rs6768713	3	111477774	0.00790721
24	rs6802995	3	111480737	0.0113284
24	rs4431081	3	111482048	0.0195171
24	rs7427201	3	111482067	0.00553303
24	rs12490166	3	111482157	0.00661238
24	rs7614443	3	111482419	0.0113284
24	rs9838371	3	111482802	0.00463276
24	rs6786386	3	111483856	0.0234265
24	rs6790072	3	111485002	0.00553303
24	rs6790079	3	111485020	0.00661238
24	rs6777540	3	111485349	0.00946149
24	rs9863403	3	111485681	0.00946149
24	rs6800922	3	111488596	0.00397667
24	rs9858228	3	111491772	0.00397667
24	rs9862472	3	111492054	0.00397667
24	rs66786213	3	111492085	0.0105925
24	rs66856712	3	111492208	0.00694465
24	rs58124137	3	111492406	0.00694465
24	rs73222475	3	111492710	0.00694465
24	rs60867472	3	111492718	0.00694465
24	rs58663746	3	111492948	0.00397667
24	rs6762246	3	111493336	0.00525112
24	rs6800047	3	111493648	0.00525112
24	rs6800065	3	111493717	0.00525112
24	rs6787278	3	111493739	0.0045688
24	rs6789977	3	111493868	0.00603765
24	rs6802960	3	111494319	0.00525112
24	rs6790521	3	111494363	0.00525112
24	rs6790355	3	111494386	0.00525112
24	rs6790612	3	111494458	0.00525112
24	rs6790825	3	111494663	0.00525112
24	rs6790977	3	111494820	0.00946149
24	rs13321524	3	111495092	0.00525112
24	rs13322494	3	111495918	0.00525112
24	rs28534728	3	111497463	0.00525112
24	rs28648833	3	111497781	0.00525112
24	rs4390898	3	111497948	0.00525112
24	rs4634085	3	111498125	0.00525112
24	rs28675079	3	111500002	0.0045688
24	rs6762572	3	111500801	0.00525112
24	rs6778818	3	111500998	0.00525112
24	rs6782513	3	111502233	0.00525112
24	rs9843288	3	111504556	0.0045688
24	rs67970120	3	111508929	0.00919848
25	rs11711620	3	114444572	0.00377173
25	rs9842905	3	114498351	0.349488
25	rs9853475	3	114500255	0.598875
26	rs4680338	3	156794425	0.109528
26	rs13322435	3	156795468	0.0718359
26	rs9854955	3	156795525	0.047227
26	rs55730982	3	156797208	0.0582287
26	rs56082403	3	156797225	0.0311222
26	rs10049210	3	156797373	0.157888
26	rs10049090	3	156797702	0.157888
26	rs67261871	3	156797941	0.0227986
26	rs1482852	3	156798294	0.127023
26	rs1482853	3	156798473	0.0227986
26	rs900399	3	156798732	0.066391
26	rs900400	3	156798775	0.0823688
27	rs6441306	3	159952278	0.00780863
27	rs7624902	3	160004026	0.00780863
27	rs6791261	3	160016446	0.00438612
27	rs4680576	3	160021681	0.00506172
27	rs4679881	3	160028014	0.0119325
27	rs55687857	3	160029964	0.0102632
27	rs6441313	3	160036400	0.0102632
27	rs1953506	3	160036448	0.0102632
27	rs58665246	3	160043456	0.00286455
27	rs62272186	3	160046177	0.0102632
27	rs869468	3	160047440	0.00506172
27	rs6803828	3	160058562	0.0102632
27	rs6792612	3	160060748	0.00329959
27	rs6441314	3	160061145	0.0102632
27	rs60009222	3	160063356	0.0102632
27	rs11918749	3	160067930	0.0102632
27	rs55731730	3	160072378	0.0119325
27	rs9798898	3	160082154	0.00883324
27	rs10513551	3	160086055	0.00883324
27	rs7611130	3	160106781	0.0102632
27	rs4680579	3	160109657	0.0102632
27	rs6793560	3	160113469	0.0102632
27	rs4680580	3	160115004	0.0121141
27	rs7634108	3	160124695	0.0119325
27	rs9968151	3	160126036	0.0119325
27	rs2305407	3	160130110	0.0102632
27	rs1451762	3	160131576	0.00438612
27	rs1451761	3	160131667	0.00506172
27	rs73154592	3	160137748	0.0164036
27	rs7631792	3	160148756	0.010458
27	rs13403	3	160152299	0.010458
27	rs7629	3	160153305	0.0121141
27	rs4679885	3	160154747	0.010458
27	rs4680585	3	160167194	0.0188994
27	rs2279457	3	160168292	0.021947
27	rs60460891	3	160168769	0.0296512
27	rs7629202	3	160169197	0.025502
27	rs56394279	3	160171092	0.138562
27	rs6808083	3	160171453	0.0545295
27	rs6441320	3	160172274	0.025502
27	rs7634826	3	160179503	0.0401601
27	rs4091703	3	160187959	0.0467819
27	rs4680587	3	160188242	0.0545295
27	rs3851366	3	160191374	0.0742253
27	rs4680588	3	160192518	0.0401601
27	rs6798668	3	160200408	0.00380307
27	rs4679888	3	160211871	0.00506172
27	rs3773372	3	160232432	0.00248842
27	rs62272791	3	160241657	0.00438612
27	rs62272792	3	160241674	0.00438612
27	rs62272794	3	160250880	0.00329959
27	rs7640072	3	160257386	0.00329959
27	rs56197102	3	160258281	0.00216303
27	rs62272800	3	160263384	0.00286455
27	rs2366969	3	160273758	0.00329959
27	rs1882126	3	160284194	0.00329959
27	rs3732707	3	160286646	0.00286455
27	rs62272810	3	160290299	0.00506172
27	rs4292274	3	160291468	0.00380307
27	rs4679896	3	160291866	0.00329959
27	rs4679655	3	160292900	0.00286455
27	rs17570467	3	160294561	0.00380307
27	rs4679899	3	160301365	0.00286455
27	rs4679900	3	160301772	0.00506172
27	rs1920662	3	160303591	0.00216303
27	rs6806505	3	160305648	0.00329959
28	rs2279193	4	8357835	0.00693859
28	rs10938709	4	8380329	0.0333178
28	rs2386223	4	8398125	0.0161764
28	rs3796740	4	8401124	0.00414019
28	rs12503034	4	8403089	0.00917748
28	rs1880025	4	8404346	0.00797741
28	rs2631752	4	8405314	0.456529
28	rs2245515	4	8415982	0.00399594
28	rs2245808	4	8418430	0.00265905
28	rs2245809	4	8418440	0.00869527
28	rs2049302	4	8418605	0.0596051
28	rs2631766	4	8418779	0.0287989
28	rs2631765	4	8418997	0.0694363
28	rs2631763	4	8422987	0.0596051
28	rs2140336	4	8424831	0.0596051
28	rs2688244	4	8437033	0.0694363
28	rs2631728	4	8438534	0.00735125
28	rs2688246	4	8441264	0.0100434
28	rs2631727	4	8443776	0.00348645
28	rs56343159	4	8446263	0.00265905
28	rs2688234	4	8447205	0.00304382
28	rs11729265	4	8455011	0.00304382
28	rs2631769	4	8466866	0.00304382
28	rs2631737	4	8479418	0.00693859
28	rs2688221	4	8479448	0.005259
28	rs2631757	4	8493651	0.00399594
28	rs4325994	4	8494292	0.00265905
28	rs3115396	4	8510952	0.00328446
29	rs12507413	4	39441490	0.121655
29	rs6835490	4	39444337	0.00592364
29	rs1048140	4	39478832	0.0358467
29	rs2687965	4	39491521	0.50179
29	rs6858752	4	39493141	0.0923214
29	rs6531721	4	39497391	0.0468253
29	rs1450	4	39500514	0.0468253
29	rs58958665	4	39501549	0.0702361
29	rs13129975	4	39526641	0.00978489
29	rs13146483	4	39528939	0.00760379
29	rs62308020	4	39533080	0.00760379
29	rs12512204	4	39533948	0.00670925
30	rs11942410	4	75656079	0.0433275
30	rs7440630	4	75657434	0.0226323
30	rs4299672	4	75657662	0.0274761
30	rs72659187	4	75660896	0.0242708
30	rs62316262	4	75660946	0.0274761
30	rs4535401	4	75661825	0.0274761
30	rs59178205	4	75662446	0.0274761
30	rs62316264	4	75662524	0.0274761
30	rs62316265	4	75662635	0.0274761
30	rs62316266	4	75662692	0.0214499
30	rs62316267	4	75663035	0.0242708
30	rs62316268	4	75663155	0.0352648
30	rs62316269	4	75663157	0.0352648
30	rs62316270	4	75663307	0.0242708
30	rs62316271	4	75663588	0.0242708
30	rs12503079	4	75664504	0.0189663
30	rs12505535	4	75664544	0.0242708
30	rs57917278	4	75664936	0.0214499
30	rs62316273	4	75665824	0.0214499
30	rs72659189	4	75666083	0.0214499
30	rs62316274	4	75666318	0.0214499
30	rs11946159	4	75666873	0.0214499
30	rs11933389	4	75666880	0.0214499
30	rs4426860	4	75667907	0.0214499
30	rs4345250	4	75667920	0.0214499
30	rs62316275	4	75668103	0.0214499
30	rs4496650	4	75668955	0.0214499
30	rs72659193	4	75670109	0.0214499
30	rs72659195	4	75670183	0.0214499
30	rs72659197	4	75670402	0.0214499
30	rs72659198	4	75670976	0.0214499
30	rs62316277	4	75673533	0.00915839
30	rs62316278	4	75673724	0.00915839
30	rs62316279	4	75675110	0.00915839
30	rs62316280	4	75675218	0.0103271
30	rs35926103	4	75675706	0.0103271
30	rs11938276	4	75676256	0.0103271
30	rs62316308	4	75676337	0.00915839
30	rs62316309	4	75676504	0.0103271
30	rs62316310	4	75676529	0.00915839
30	rs62316311	4	75676572	0.0103271
30	rs62316312	4	75676596	0.0103271
30	rs62316313	4	75679954	0.0157841
30	rs4352548	4	75683594	0.0126806
30	rs6840529	4	75686605	0.0343925
30	rs6811334	4	75686640	0.0205265
31	rs28676957	4	95903741	0.0280904
31	rs3775031	4	95905449	0.017871
31	rs6532522	4	95911022	0.00483638
31	rs6831094	4	95912731	0.0241445
31	rs1545326	4	95914424	0.0158171
31	rs13128586	4	95915751	0.0202001
31	rs13129054	4	95915991	0.0202001
31	rs4145993	4	95916279	0.0202001
31	rs6855395	4	95917980	0.0258405
31	rs1470409	4	95920238	0.0331109
31	rs1444926	4	95920959	0.0424975
31	rs4397000	4	95922630	0.0424975
31	rs4331783	4	95922662	0.0424975
31	rs4299590	4	95923764	0.00923971
31	rs10023544	4	95927802	0.0327017
31	rs6840826	4	95931754	0.0375039
31	rs6532525	4	95932152	0.0258405
31	rs12500473	4	95933337	0.0454642
31	rs6832300	4	95935914	0.0532419
31	rs1348605	4	95936263	0.0532419
31	rs12647875	4	95942472	0.0623912
31	rs6815044	4	95943641	0.0623912
31	rs28663472	4	95948204	0.100796
31	rs7679627	4	95949153	0.100796
31	rs1434546	4	95954962	0.0331109
32	rs7663401	4	106128954	0.0903045
32	rs2007403	4	106131210	0.107182
32	rs6533183	4	106133184	0.0663878
32	rs2047409	4	106137033	0.0761319
32	rs11735256	4	106138146	0.0903045
32	rs6839705	4	106144735	0.0925938
32	rs1391439	4	106151642	0.0903045
32	rs7683416	4	106152984	0.0521374
32	rs7670522	4	106160365	0.0186455
32	rs62330911	4	106167744	0.015745
32	rs2647246	4	106171635	0.0261995
32	rs2647247	4	106171652	0.0261995
32	rs2647248	4	106174936	0.0261995
32	rs2133086	4	106178289	0.015745
32	rs1032625	4	106181573	0.0261995
32	rs2454205	4	106184229	0.0186455
32	rs2726459	4	106184597	0.015745
32	rs2726521	4	106189614	0.0220948
32	rs2647250	4	106190226	0.0369105
32	rs2726520	4	106193160	0.0186455
32	rs2726519	4	106193334	0.0186455
33	rs6858755	4	124632243	0.0397899
33	rs9654147	4	124638933	0.0239037
33	rs1834378	4	124650005	0.0479018
33	rs11737502	4	124650645	0.0547045
33	rs28433008	4	124652058	0.0625104
33	rs11098717	4	124652559	0.0479018
33	rs12505949	4	124654206	0.0547045
33	rs12509610	4	124654263	0.0547045
33	rs4833289	4	124654865	0.0419699
33	rs67254681	4	124655126	0.0479018
33	rs28757571	4	124656268	0.0547045
33	rs2060285	4	124746377	0.440893
34	rs72918058	4	126906982	0.0897367
34	rs12651652	4	126910178	0.0684773
34	rs17823858	4	126911191	0.0684773
34	rs6817714	4	126914437	0.0269312
34	rs17824014	4	126917274	0.0783733
34	rs17010555	4	126917337	0.0350873
34	rs17010558	4	126917820	0.0269312
34	rs12647708	4	126921277	0.0783733
34	rs28403275	4	126924684	0.0783733
34	rs17824374	4	126924999	0.10279
34	rs12513259	4	126930930	0.0523415
34	rs2390928	4	126931413	0.0457896
34	rs28446518	4	126933901	0.0159453
34	rs72920119	4	126934327	0.0159453
34	rs7674065	4	126939254	0.0181663
34	rs6829242	4	126951364	0.005024
34	rs4373172	4	126951752	0.00570241
34	rs28882098	4	126952068	0.00570241
34	rs28773024	4	126952428	0.00570241
34	rs28594485	4	126957129	0.005024
34	rs7682992	4	126958372	0.00442813
34	rs7683776	4	126958705	0.00442813
34	rs7661885	4	126958758	0.00390457
34	rs7689104	4	126958909	0.00390457
34	rs9985873	4	126959315	0.00390457
34	rs9985557	4	126959509	0.00390457
34	rs9986035	4	126959516	0.00390457
34	rs9985879	4	126959860	0.00390457
34	rs10020123	4	126960081	0.00390457
34	rs10020221	4	126960184	0.00390457
34	rs6812443	4	126961254	0.00442813
34	rs6813545	4	126961471	0.00390457
34	rs6813583	4	126961520	0.00390457
34	rs12054487	4	126962278	0.00390457
34	rs7668769	4	126963073	0.00390457
34	rs7669189	4	126963192	0.00390457
34	rs2390957	4	126964262	0.00390457
34	rs7675977	4	126964299	0.00390457
34	rs7676003	4	126964373	0.00390457
34	rs4992078	4	126964592	0.00390457
34	rs4992079	4	126964681	0.00390457
34	rs4992080	4	126964691	0.00390457
34	rs9307580	4	126964999	0.00390457
34	rs9307581	4	126965121	0.00390457
34	rs6830127	4	126965665	0.00390457
34	rs6858839	4	126966165	0.00390457
34	rs6858823	4	126966184	0.00442813
34	rs6836332	4	126966284	0.00442813
34	rs6836803	4	126966519	0.00570241
34	rs6811015	4	126966525	0.005024
35	rs10009710	4	145233103	0.00156195
35	rs6830386	4	145235543	0.00180328
35	rs13118748	4	145259126	0.0053941
35	rs7661046	4	145260495	0.0122347
35	rs7375701	4	145260561	0.00240728
35	rs6822064	4	145263756	0.00672523
35	rs6840871	4	145264014	0.0184031
35	rs4493485	4	145267634	0.0251466
35	rs4266245	4	145267780	0.0251466
35	rs12503296	4	145269728	0.00135361
35	rs987246	4	145270867	0.0215064
35	rs4340757	4	145271071	0.0215064
35	rs6537280	4	145280378	0.00431661
35	rs7378179	4	145284208	0.00372737
35	rs4465995	4	145291206	0.00372737
35	rs4475093	4	145292676	0.00240728
35	rs10029738	4	145297419	0.0157561
35	rs10029931	4	145297618	0.0134971
35	rs7681655	4	145298829	0.0134971
35	rs7376541	4	145300126	0.0134971
35	rs4469023	4	145300434	0.0134971
35	rs4370082	4	145300629	0.0115683
35	rs7665807	4	145301382	0.0115683
35	rs4318599	4	145302123	0.0115683
35	rs6537284	4	145303691	0.0115683
35	rs4383570	4	145304604	0.0115683
35	rs7693416	4	145305357	0.0115683
35	rs12645910	4	145307421	0.0134971
35	rs6537287	4	145312027	0.0134971
35	rs11943469	4	145313847	0.0134971
35	rs6812520	4	145315659	0.0157561
35	rs4572828	4	145320293	0.0157561
35	rs7676032	4	145321068	0.0157561
35	rs4420930	4	145321237	0.0157561
35	rs4376087	4	145321355	0.0184031
35	rs62334726	4	145341042	0.00579822
35	rs72731556	4	145345984	0.00672523
35	rs17019346	4	145347117	0.00156195
35	rs11726412	4	145354023	0.00156195
35	rs144044336	4	145361196	0.00180328
35	rs62334729	4	145361908	0.00208297
35	rs62334730	4	145362891	0.00180328
35	rs749316	4	145371346	0.00180328
35	rs749317	4	145372009	0.00180328
35	rs17019365	4	145373134	0.00208297
35	rs17019368	4	145375405	0.00208297
35	rs17019370	4	145381766	0.00189619
35	rs11733975	4	145386473	0.0157561
35	rs62343635	4	145388954	0.0184031
35	rs17019390	4	145417318	0.00240728
35	rs11736238	4	145418294	0.00180328
35	rs72731582	4	145418803	0.00322023
35	rs60539540	4	145422551	0.00240728
35	rs56071345	4	145423450	0.00208297
35	rs13116963	4	145424767	0.00208297
35	rs17019400	4	145428511	0.00240728
35	rs60950736	4	145429878	0.00240728
35	rs11727583	4	145433002	0.00372737
35	rs17019408	4	145433452	0.00322023
35	rs1032296	4	145434688	0.00962076
35	rs7681384	4	145437014	0.00588472
35	rs6821114	4	145452389	0.00139287
35	rs6845536	4	145452783	0.0133933
35	rs1489764	4	145454228	0.00163065
35	rs1489761	4	145455491	0.00191022
35	rs7692102	4	145457141	0.00191022
35	rs7674469	4	145458001	0.00223912
35	rs7663578	4	145468791	0.0434805
35	rs7663740	4	145468845	0.00262628
35	rs6828982	4	145470604	0.00500158
35	rs12511230	4	145471245	0.00180962
35	rs13113445	4	145472766	0.00692813
35	rs4834988	4	145478777	0.00692813
35	rs12510044	4	145484638	0.00816164
35	rs10029430	4	145498412	0.00816164
35	rs6537297	4	145502029	0.0309616
35	rs6537298	4	145506871	0.0261513
35	rs7670758	4	145511875	0.0366795
35	rs1542726	4	145515769	0.206696
35	rs1489765	4	145516378	0.0196302
36	rs10475282	5	523995	0.0300861
36	rs72704802	5	554211	0.00341779
36	rs4527146	5	555236	0.00391917
36	rs12522303	5	555564	0.00341779
36	rs12521988	5	556421	0.00391917
36	rs17497684	5	558307	0.00298169
36	rs4957056	5	570105	0.00341779
36	rs72703026	5	572383	0.0078152
36	rs4081847	5	574072	0.00680233
36	rs4957053	5	575927	0.00898235
36	rs111352378	5	577079	0.0103278
36	rs72703034	5	577101	0.0103278
36	rs7443550	5	578404	0.0103278
36	rs4245972	5	578572	0.0118792
36	rs72703042	5	579269	0.0118792
36	rs58015612	5	580665	0.0118792
36	rs56216231	5	581193	0.0118792
36	rs12519469	5	581772	0.0103278
36	rs56368535	5	582362	0.013669
36	rs56278696	5	582669	0.0157346
36	rs72703051	5	582997	0.015314
36	rs56350081	5	583198	0.0157346
36	rs12522140	5	587261	0.013669
36	rs12518859	5	587432	0.013669
36	rs72703064	5	587825	0.013669
36	rs72703065	5	588123	0.013669
36	rs1399381	5	589853	0.0118792
36	rs72703070	5	590458	0.0208731
36	rs72703072	5	590626	0.0181191
36	rs12521091	5	590710	0.013669
36	rs12522724	5	590742	0.013669
36	rs56328416	5	591138	0.013669
36	rs72703075	5	592819	0.0101353
36	rs111707179	5	593308	0.00296548
36	rs56282020	5	596701	0.0025811
36	rs57306627	5	597643	0.0025811
36	rs11750321	5	599196	0.00296548
36	rs72703092	5	599269	0.00340845
36	rs3749615	5	601485	0.0025811
36	rs72703095	5	601789	0.0025811
36	rs3749618	5	602650	0.00296548
36	rs11739847	5	609661	0.00296548
36	rs11739866	5	636299	0.0025811
36	rs12522955	5	639231	0.00296548
36	rs3792720	5	643028	0.00518785
36	rs4957080	5	644552	0.00597233
36	rs12517638	5	645484	0.00391917
36	rs72705030	5	645562	0.00518785
36	rs4957081	5	646418	0.00450821
36	rs72705097	5	655067	0.00518785
36	rs113896354	5	655438	0.00518785
36	rs12520279	5	657291	0.00450821
36	rs4957083	5	659343	0.00450821
36	rs72705102	5	659437	0.00450821
36	rs7558	5	660491	0.00450821
36	rs7434	5	660804	0.00450821
36	rs72707007	5	661856	0.00597233
36	rs3762951	5	662613	0.00687819
36	rs28364691	5	664084	0.0121487
36	rs72707016	5	665148	0.00515932
36	rs61731455	5	665295	0.00680233
36	rs74553517	5	665671	0.005923
36	rs72707023	5	667620	0.0338477
36	rs11749927	5	668842	0.0266892
36	rs77015126	5	670909	0.0175857
36	rs72707027	5	671294	0.0266892
36	rs12515813	5	671826	0.0175857
36	rs11740553	5	672593	0.035312
36	rs11742854	5	674141	0.0130323
36	rs12516318	5	676423	0.032496
36	rs12519390	5	676546	0.0371971
36	rs72707041	5	677152	0.00391917
36	rs72707043	5	677200	0.032496
36	rs72707044	5	677239	0.032496
36	rs56060145	5	681279	0.0217113
36	rs113948530	5	681976	0.0189934
36	rs72707053	5	684483	0.0239928
36	rs55651840	5	684848	0.00269876
36	rs55660354	5	684888	0.0210351
36	rs11745112	5	685849	0.0312455
36	rs35696919	5	686244	0.00917878
37	rs13170478	5	15602644	0.00290099
37	rs12187518	5	15623646	0.00351305
37	rs13185548	5	15655056	0.00256486
37	rs12654662	5	15659239	0.00697926
37	rs17647599	5	15659551	0.00256486
37	rs12658048	5	15664613	0.00200833
37	rs74655962	5	15680745	0.00284095
37	rs77887104	5	15688284	0.0031021
37	rs17523716	5	15688710	0.0023848
37	rs17602097	5	15688927	0.00200419
37	rs75872775	5	15693584	0.00218591
37	rs17523929	5	15700585	0.00218591
37	rs17524082	5	15722647	0.00198403
37	rs17602533	5	15741441	0.0423664
37	rs4379195	5	15743346	0.057199
37	rs113271117	5	15744475	0.057199
37	rs111608913	5	15745063	0.057199
37	rs13189719	5	15749077	0.057199
37	rs2173691	5	15753663	0.0468105
37	rs1909723	5	15757154	0.0468105
37	rs61026653	5	15757570	0.057199
37	rs17602672	5	15758279	0.0423664
37	rs1973477	5	15759237	0.0468105
37	rs36056396	5	15765428	0.0517368
37	rs36139170	5	15766089	0.0423664
37	rs6870946	5	15767015	0.0468105
37	rs6870947	5	15767018	0.0468105
37	rs34894816	5	15768609	0.00592759
37	rs10520824	5	15768708	0.0096138
37	rs2402182	5	15769041	0.0468105
37	rs952161	5	15769146	0.0096138
37	rs13174706	5	15771042	0.0517368
37	rs10462723	5	15771101	0.0240164
37	rs12186993	5	15772779	0.00592759
37	rs1505033	5	15773877	0.00531884
37	rs1505035	5	15774466	0.00531884
37	rs1505036	5	15776264	0.0423664
37	rs6896896	5	15776401	0.00592759
37	rs2055624	5	15777817	0.00271135
38	rs6449598	5	50665023	0.0770163
38	rs7701852	5	50666897	0.0770163
38	rs6449600	5	50675297	0.0770163
38	rs6899279	5	50678414	0.0882768
38	rs3811910	5	50681032	0.116088
38	rs62368263	5	50726027	0.465367
38	rs17824230	5	50759375	0.0586773
39	rs6449598	5	50665023	0.0770163
39	rs7701852	5	50666897	0.0770163
39	rs6449600	5	50675297	0.0770163
39	rs6899279	5	50678414	0.0882768
39	rs3811910	5	50681032	0.116088
39	rs62368263	5	50726027	0.465367
39	rs17824230	5	50759375	0.0586773
40	rs13154000	5	93027669	0.00192874
40	rs67914792	5	93036584	0.00192874
40	rs167570	5	93042348	0.00253709
40	rs17312456	5	93043907	0.00192874
40	rs10055389	5	93046997	0.00160887
40	rs13154650	5	93052205	0.000940271
40	rs72786647	5	93053517	0.00134359
40	rs28534784	5	93063332	0.00134359
40	rs17372057	5	93071916	0.00102759
40	rs12153021	5	93073913	0.00176131
40	rs13165400	5	93091427	0.00147005
40	rs13357713	5	93145423	0.00086062
40	rs10061377	5	93174513	0.00102759
40	rs10075217	5	93176774	0.000940271
40	rs36042718	5	93180997	0.00086062
40	rs13153987	5	93190000	0.00102759
40	rs10038424	5	93193437	0.000940271
40	rs10066431	5	93198204	0.000940271
40	rs6877030	5	93201841	0.00086062
40	rs6898842	5	93213221	0.00086062
40	rs6874766	5	93213807	0.000940271
40	rs35496867	5	93220400	0.00086062
40	rs34967135	5	93221785	0.00086062
40	rs7715562	5	93222034	0.000940271
40	rs13171131	5	93223028	0.00086062
40	rs28705226	5	93233135	0.00086062
40	rs67328989	5	93243133	0.00086062
40	rs28610997	5	93248374	0.00086062
40	rs28412976	5	93248377	0.00102759
40	rs72786702	5	93254656	0.00086062
40	rs74825443	5	93254973	0.00086062
40	rs10067259	5	93290838	0.000940271
40	rs17374627	5	93296306	0.00305025
40	rs10055741	5	93297187	0.00231486
40	rs7734897	5	93305402	0.00253709
40	rs7736620	5	93305762	0.00253709
40	rs13186579	5	93306939	0.0012743
40	rs13177800	5	93307350	0.00231486
40	rs13173952	5	93307557	0.00253709
40	rs10036829	5	93309897	0.00231486
40	rs35747258	5	93310129	0.00211269
40	rs7701974	5	93311417	0.00253709
40	rs7701011	5	93311456	0.00231486
40	rs34673483	5	93315079	0.00231486
40	rs10055340	5	93317644	0.00231486
40	rs10076052	5	93317762	0.00211269
40	rs113566899	5	93322042	0.00943606
40	rs9314092	5	93326362	0.00186551
40	rs13169675	5	93331284	0.00278146
40	rs9314093	5	93333347	0.00211269
40	rs10476591	5	93333723	0.00186551
40	rs13185660	5	93336500	0.00278146
40	rs28575883	5	93346035	0.00278146
40	rs10076192	5	93348073	0.00305025
40	rs10062711	5	93348659	0.00305025
40	rs10050465	5	93349963	0.00334596
40	rs10066791	5	93350255	0.00334596
40	rs2290937	5	93356515	0.00402965
40	rs12109629	5	93359702	0.00402965
40	rs12153501	5	93360866	0.00402965
40	rs12153506	5	93360953	0.00402965
40	rs10078194	5	93364310	0.0036714
40	rs10476596	5	93367074	0.00334596
40	rs10476597	5	93367172	0.00334596
40	rs10476598	5	93367281	0.0036714
40	rs34595581	5	93369422	0.00334596
40	rs13153245	5	93374891	0.0036714
40	rs13170509	5	93378564	0.00334596
40	rs10065056	5	93380123	0.0036714
40	rs9885329	5	93380278	0.00334596
40	rs10476599	5	93383423	0.00334596
40	rs35075119	5	93385457	0.00402965
40	rs34138834	5	93385505	0.00402965
40	rs10060160	5	93387879	0.0036714
40	rs13156865	5	93390908	0.00402965
40	rs10061099	5	93396715	0.00402965
40	rs12716456	5	93397557	0.00402965
40	rs12716457	5	93397627	0.0036714
40	rs10072232	5	93398890	0.0036714
40	rs10057814	5	93399092	0.00402965
40	rs2085960	5	93399934	0.0036714
40	rs10063612	5	93401133	0.00442412
40	rs10476601	5	93402522	0.0036714
40	rs7728736	5	93404277	0.00402965
40	rs72788365	5	93404792	0.00270409
40	rs12153788	5	93405437	0.0036714
40	rs12152763	5	93405509	0.0036714
40	rs10072592	5	93405989	0.00402965
40	rs10044139	5	93407803	0.00211269
40	rs10514380	5	93409370	0.00402965
40	rs71641007	5	93413044	0.00586481
40	rs12716460	5	93416733	0.00533728
40	rs10061080	5	93420559	0.00644632
40	rs13165147	5	93422214	0.00586481
40	rs13356088	5	93423479	0.00807197
40	rs66696214	5	93424533	0.00586481
40	rs10440717	5	93424852	0.00244193
40	rs9314095	5	93425495	0.00533728
40	rs9314096	5	93426005	0.0103866
40	rs10064520	5	93427358	0.00586481
40	rs55832164	5	93436579	0.00533728
40	rs10044066	5	93437580	0.00586481
40	rs17315943	5	93442830	0.00586481
40	rs10057605	5	93443950	0.00644632
40	rs34184666	5	93444584	0.00586481
40	rs10476602	5	93445255	0.00708753
40	rs17083455	5	93446380	0.00644632
40	rs28633397	5	93447048	0.00644632
40	rs9314099	5	93447375	0.00708753
40	rs9314100	5	93447394	0.00586481
40	rs10059230	5	93450347	0.00533728
40	rs10070390	5	93452345	0.0048586
40	rs10060462	5	93455073	0.00533728
40	rs17316137	5	93456577	0.00533728
40	rs10063045	5	93457584	0.00807197
40	rs10059630	5	93459807	0.00533728
40	rs10213956	5	93460839	0.00533728
40	rs9314101	5	93461593	0.0048586
40	rs10476526	5	93461916	0.0048586
40	rs17083460	5	93462354	0.0048586
40	rs17083462	5	93462401	0.00402965
40	rs12716462	5	93466003	0.00533728
40	rs10073039	5	93467709	0.00586481
40	rs12153676	5	93468524	0.00586481
40	rs143657929	5	93470525	0.00586481
40	rs55783479	5	93473130	0.00644632
40	rs34890659	5	93475424	0.00644632
40	rs10052428	5	93476530	0.00708753
40	rs7718842	5	93480568	0.00779475
40	rs12374470	5	93481046	0.00708753
40	rs12374432	5	93481348	0.00708753
40	rs12374488	5	93481407	0.00708753
40	rs12374463	5	93483569	0.00708753
40	rs7702521	5	93484579	0.0036714
40	rs10055994	5	93488425	0.008575
40	rs10040648	5	93490301	0.00644632
40	rs10035340	5	93490465	0.0066953
40	rs56373208	5	93491276	0.00779475
40	rs67066109	5	93494101	0.00779475
40	rs28637444	5	93495548	0.00779475
40	rs9314102	5	93500251	0.00943606
40	rs36026719	5	93505876	0.0107077
40	rs34013242	5	93507947	0.00807197
40	rs13156002	5	93508931	0.00281102
40	rs9968749	5	93509559	0.00807197
40	rs13185608	5	93509688	0.00506827
40	rs9968691	5	93509756	0.00807197
40	rs59472588	5	93511981	0.0066953
40	rs12187701	5	93522290	0.0107077
40	rs36091096	5	93525586	0.0129453
40	rs56046246	5	93531545	0.0156677
40	rs58734583	5	93532155	0.0172439
40	rs13181660	5	93533658	0.0156677
40	rs3940842	5	93534858	0.0172439
40	rs34854140	5	93538169	0.0172439
40	rs61132622	5	93539684	0.0209052
40	rs17376207	5	93545524	0.0156677
40	rs13163610	5	93548877	0.0172439
40	rs13154249	5	93550508	0.0189838
40	rs17323433	5	93551028	0.0172439
40	rs66978370	5	93553633	0.0156677
40	rs13174700	5	93554644	0.0189838
40	rs6867042	5	93555761	0.0230273
40	rs34756085	5	93556294	0.0189838
40	rs17376456	5	93557702	0.0189838
40	rs12188453	5	93560807	0.0132933
40	rs35184505	5	93561535	0.0146007
40	rs12189466	5	93562287	0.0121062
40	rs34068652	5	93563319	0.00787905
40	rs10514382	5	93566534	0.00719695
40	rs4547912	5	93571190	0.00657562
41	rs11745914	5	97654496	0.00268687
41	rs17165848	5	97655053	0.00391717
41	rs17165849	5	97655286	0.00444697
41	rs6876270	5	97655526	0.00444697
41	rs62366857	5	97655681	0.00391717
41	rs12654883	5	97656313	0.048438
41	rs1350022	5	97656609	0.00505142
41	rs1378444	5	97656641	0.00574144
41	rs4538635	5	97656704	0.00505142
41	rs6898721	5	97659340	0.00574144
41	rs12652566	5	97660264	0.00505142
41	rs35774032	5	97660482	0.00743035
41	rs60805392	5	97660706	0.00574144
41	rs12513398	5	97661152	0.00574144
41	rs7723838	5	97661663	0.00505142
41	rs2198680	5	97662522	0.00743035
41	rs1455427	5	97700050	0.00444697
41	rs10067255	5	97757677	0.00352953
41	rs1563319	5	97764143	0.0554395
41	rs7715564	5	97764522	0.00885493
41	rs10043462	5	97765856	0.0263017
41	rs1002268	5	97766797	0.0229053
41	rs59060802	5	97768250	0.0302207
41	rs1563318	5	97768368	0.00743035
41	rs1563317	5	97768486	0.0347452
41	rs3890433	5	97768954	0.0263017
41	rs1473378	5	97769853	0.00743035
41	rs1840496	5	97771540	0.0174041
41	rs56410174	5	97772643	0.0263017
41	rs59941249	5	97773493	0.0199599
41	rs56870134	5	97773523	0.0199599
41	rs12152743	5	97773634	0.0174041
41	rs1840493	5	97774464	0.0229053
41	rs61048056	5	97775200	0.0263017
41	rs6861347	5	97775269	0.0199599
41	rs11949814	5	97775678	0.0101236
41	rs66986022	5	97776864	0.00885493
41	rs73143889	5	97776897	0.0199599
41	rs11951464	5	97777031	0.0199599
41	rs11950768	5	97777300	0.0174041
41	rs2085231	5	97778876	0.0101236
41	rs751882	5	97779409	0.0174041
41	rs6865661	5	97780336	0.0199599
41	rs10063500	5	97780622	0.0199599
41	rs2368553	5	97781753	0.0246738
41	rs1037597	5	97783046	0.0284431
41	rs1037598	5	97783125	0.0161704
41	rs1037599	5	97783491	0.0186041
41	rs9686816	5	97783958	0.0246738
41	rs10043034	5	97784526	0.0328098
41	rs11241450	5	97784711	0.0161704
41	rs1072722	5	97785425	0.0101236
41	rs10035465	5	97786312	0.0115813
41	rs12152757	5	97786359	0.00678728
41	rs1840494	5	97787110	0.0132572
41	rs1840495	5	97787165	0.00678728
41	rs723206	5	97789313	0.00885493
41	rs723207	5	97789681	0.00775006
41	rs7717448	5	97790471	0.0115813
41	rs7717913	5	97790692	0.00885493
41	rs6870628	5	97791720	0.00775006
41	rs11241481	5	97792958	0.00316467
41	rs17165974	5	97794284	0.00361238
41	rs4434407	5	97795220	0.00401763
41	rs12655510	5	97795382	0.00361238
41	rs10463714	5	97797651	0.00361238
41	rs10463716	5	97797822	0.00361238
41	rs10463717	5	97797963	0.00361238
41	rs11241524	5	97801699	0.00277427
42	rs79121939	5	164487955	0.0454272
42	rs72807969	5	164504397	0.0334234
42	rs72809524	5	164517704	0.0503486
42	rs6556812	5	164589870	0.0370124
42	rs72817597	5	164603356	0.0105917
42	rs12189342	5	164604894	0.00680623
42	rs72817599	5	164611054	0.00621441
42	rs72817600	5	164611652	0.0333667
42	rs72819561	5	164628055	0.00745629
42	rs12153515	5	164631794	0.104273
42	rs17392297	5	164642051	0.0333667
42	rs72819565	5	164653671	0.00680623
42	rs72819568	5	164669872	0.0156094
42	rs2861140	5	164682127	0.0643547
42	rs4291038	5	164688851	0.0266534
42	rs971569	5	164690314	0.0499183
42	rs973845	5	164692215	0.0499183
42	rs973847	5	164692410	0.0439928
42	rs6870836	5	164696206	0.0387875
42	rs1160830	5	164698709	0.030191
42	rs6859347	5	164708583	0.0080643
42	rs1433001	5	164710430	0.034213
42	rs72819586	5	164714501	0.00621441
42	rs6556816	5	164731732	0.0266534
42	rs13174360	5	164741327	0.0235405
42	rs13166122	5	164743780	0.0183868
42	rs13166291	5	164743857	0.0183868
42	rs2861144	5	164744450	0.0183868
42	rs2115255	5	164746324	0.0183868
42	rs72821605	5	164747563	0.0247382
42	rs1017790	5	164747878	0.0183868
42	rs72821608	5	164749129	0.0247382
42	rs11959015	5	164751760	0.00998915
42	rs11956053	5	164751881	0.00784973
43	rs9504383	6	589924	0.0285809
43	rs9405263	6	591294	0.0321401
43	rs6940427	6	591765	0.0285809
43	rs2294660	6	592249	0.0321401
43	rs3757121	6	593419	0.0113859
43	rs3799311	6	594407	0.0361612
43	rs1125815	6	595438	0.0321401
43	rs4960091	6	597744	0.0321401
43	rs3823137	6	604413	0.0361612
43	rs9405841	6	607342	0.0741519
43	rs2294666	6	617519	0.00283
43	rs1150858	6	622885	0.0324502
43	rs1150859	6	623284	0.0324502
43	rs4960127	6	624892	0.135226
43	rs4959352	6	624922	0.388517
43	rs2294669	6	625673	0.00264485
43	rs11753249	6	693638	0.012751
44	rs2318089	6	1775436	0.352974
44	rs722587	6	1775714	0.459289
44	rs722585	6	1775863	0.160715
45	rs6917728	6	17386607	0.169581
45	rs7773313	6	17386895	0.100339
45	rs7759059	6	17387038	0.130351
45	rs7755093	6	17387077	0.148652
45	rs10807610	6	17387538	0.193527
45	rs10949420	6	17387784	0.0416772
45	rs10949421	6	17387932	0.0206872
45	rs12190229	6	17388345	0.0206872
45	rs12204235	6	17388551	0.0690948
45	rs2328105	6	17457107	0.00807257
45	rs1535014	6	17460161	0.00950983
45	rs1535015	6	17460165	0.00950983
45	rs1535016	6	17460399	0.0068568
45	rs9383286	6	17461225	0.0068568
45	rs10949424	6	17462113	0.00950983
45	rs1320994	6	17470693	0.00633408
46	rs2524005	6	29899677	0.0322642
46	rs4248140	6	29935798	0.00299333
46	rs6415118	6	29935850	0.00677859
46	rs9260809	6	29941617	0.0409221
46	rs3823376	6	29944184	0.00677859
46	rs3823379	6	29944458	0.0217798
46	rs3823381	6	29944558	0.0409221
46	rs9261043	6	29966726	0.00486995
46	rs12663724	6	30059616	0.00605796
46	rs17187791	6	30060021	0.0126951
46	rs7749793	6	30060364	0.0115598
46	rs7754005	6	30060629	0.00609824
46	rs7753935	6	30060783	0.0105297
46	rs11967911	6	30060952	0.0072738
46	rs28454792	6	30061010	0.00729812
46	rs17194160	6	30061080	0.00667016
46	rs17187805	6	30061202	0.0105297
46	rs17194174	6	30061910	0.00358613
46	rs12661731	6	30062345	0.0455012
46	rs28780078	6	30062650	0.050613
46	rs28780079	6	30062973	0.0455012
46	rs28780080	6	30063086	0.050613
46	rs7765810	6	30063496	0.0409221
46	rs7761563	6	30063660	0.050613
46	rs7741418	6	30063733	0.0455012
46	rs28780082	6	30064129	0.0455012
46	rs1156533	6	30065149	0.279255
46	rs1264703	6	30065416	0.00632802
46	rs1264702	6	30065575	0.00786582
46	rs916570	6	30066031	0.0196029
46	rs916569	6	30066097	0.00245904
46	rs1264700	6	30066631	0.0027262
46	rs1264699	6	30066659	0.00302381
46	rs6457148	6	30066713	0.00245904
46	rs6457149	6	30066714	0.00245904
46	rs1264697	6	30067568	0.00245904
46	rs1116222	6	30071279	0.00295486
46	rs1116221	6	30071330	0.00453386
47	rs9489152	6	117734746	0.0269923
47	rs3777981	6	117735255	0.00506666
47	rs1853148	6	117750200	0.0529249
47	rs4945584	6	117750980	0.0529249
47	rs9372480	6	117760579	0.0903498
47	rs9374662	6	117777804	0.0320171
47	rs2180811	6	117780158	0.0637766
47	rs4946256	6	117781276	0.0227703
47	rs9374663	6	117782634	0.0536334
47	rs6937083	6	117785308	0.0536334
47	rs9387478	6	117786180	0.186041
47	rs34882116	6	117789497	0.00704462
47	rs2883418	6	117791751	0.0758855
47	rs9387479	6	117792612	0.0536334
47	rs6940922	6	117798204	0.0637766
47	rs2354346	6	117798509	0.0637766
47	rs9489213	6	117811706	0.00558233
47	rs9320604	6	117816045	0.00558233
47	rs9481728	6	117817165	0.00661069
47	rs929057	6	117818911	0.00661069
47	rs2057314	6	117819357	0.00661069
47	rs9688361	6	117821888	0.00558233
47	rs4946260	6	117822993	0.00661069
47	rs10782186	6	117823508	0.00558233
48	rs1535616	6	134171132	0.0133254
48	rs7752775	6	134172346	0.0133254
48	rs2105092	6	134184972	0.0219563
48	rs10457618	6	134188626	0.0117766
48	rs12207772	6	134189834	0.0117766
48	rs13218281	6	134193714	0.0150856
48	rs17062991	6	134193910	0.0170872
48	rs12192720	6	134195719	0.0282712
48	rs7769943	6	134196327	0.0249081
48	rs7769954	6	134196381	0.032105
48	rs12524865	6	134196674	0.0364774
48	rs1967917	6	134198175	0.0282712
48	rs2327426	6	134202690	0.262612
48	rs12194592	6	134204247	0.228635
48	rs6569912	6	134206802	0.0141161
48	rs2327429	6	134209837	0.201041
49	rs851981	6	152027074	0.0148569
49	rs851978	6	152029556	0.0458466
49	rs851977	6	152029608	0.0458466
49	rs851976	6	152030008	0.0523599
49	rs851975	6	152031303	0.0615935
49	rs1101081	6	152032917	0.0401642
49	rs1101080	6	152033643	0.0352042
49	rs3020338	6	152034062	0.0905967
49	rs13216081	6	152034624	0.0477355
49	rs13216104	6	152034758	0.0542108
49	rs13201871	6	152034820	0.0542108
49	rs6932703	6	152038240	0.0477355
49	rs10872678	6	152039964	0.0401642
49	rs12526447	6	152040125	0.0326842
49	rs12525163	6	152040291	0.0183541
49	rs3020339	6	152040615	0.0542108
49	rs10484921	6	152042260	0.0370653
49	rs11756568	6	152042413	0.0308727
49	rs7772579	6	152042502	0.0208861
49	rs3020340	6	152043290	0.0237797
49	rs7749650	6	152044872	0.0401642
49	rs7749659	6	152044884	0.0615935
50	rs6941835	6	152356270	0.0209474
50	rs9397472	6	152357047	0.0193994
50	rs9383961	6	152361239	0.0193994
50	rs4289664	6	152361383	0.0209474
50	rs60693153	6	152366829	0.0193994
50	rs9341004	6	152370248	0.0244385
50	rs9397482	6	152379539	0.0179693
50	rs3798568	6	152383383	0.0193994
50	rs3778080	6	152385236	0.0193994
50	rs35807076	6	152398814	0.0193994
50	rs12175682	6	152403253	0.0244385
50	rs3822990	6	152405965	0.0209474
50	rs35494677	6	152406628	0.0209474
50	rs66465244	6	152407061	0.0456344
50	rs67933127	6	152407150	0.0456344
50	rs13201080	6	152407782	0.0493835
50	rs17082104	6	152407839	0.0421783
50	rs3778090	6	152408028	0.0534512
50	rs3778092	6	152408273	0.0493835
50	rs9322355	6	152408649	0.0534512
50	rs9322356	6	152408659	0.0534512
50	rs9322357	6	152409236	0.0534512
50	rs9322358	6	152409263	0.0534512
50	rs9322359	6	152410022	0.0534512
50	rs3778093	6	152411179	0.0493835
50	rs3778094	6	152411198	0.0493835
50	rs3778099	6	152418575	0.0338908
51	rs6605526	6	169604100	0.118852
51	rs7756742	6	169604132	0.118852
51	rs7771838	6	169604158	0.118852
51	rs6605527	6	169605973	0.139861
51	rs9505932	6	169606389	0.118852
51	rs9505933	6	169606443	0.118852
51	rs3253	6	169616112	0.22869
52	rs17171680	7	40364448	0.0121421
52	rs10256791	7	40364726	0.0121421
52	rs12701818	7	40367581	0.0171583
52	rs6462972	7	40367949	0.0144294
52	rs4143205	7	40368296	0.020416
52	rs12701819	7	40370405	0.0144294
52	rs4452702	7	40371871	0.0144294
52	rs11764504	7	40372958	0.0171583
52	rs59533139	7	40375765	0.020416
52	rs4538778	7	40378967	0.041742
52	rs4598149	7	40379073	0.0600557
52	rs7807217	7	40379594	0.0600557
52	rs10281352	7	40383936	0.0243075
52	rs11770113	7	40384494	0.0600557
52	rs11772069	7	40386317	0.0721062
52	rs10951634	7	40386835	0.0721062
52	rs6462976	7	40396300	0.0866315
52	rs10280188	7	40398139	0.0144294
52	rs6944436	7	40401940	0.0289587
52	rs6945101	7	40402430	0.0243075
52	rs6965764	7	40409406	0.0243075
52	rs17171704	7	40421488	0.0290893
52	rs4421260	7	40424908	0.0171583
52	rs10250287	7	40436763	0.0121421
52	rs12533200	7	40437776	0.0144294
52	rs16880229	7	40442741	0.020416
52	rs9690724	7	40443252	0.0171583
52	rs11980965	7	40460189	0.0289587
52	rs3890819	7	40461332	0.04915
52	rs10245007	7	40464894	0.0243075
52	rs7782189	7	40472892	0.0289587
53	rs11760406	7	55112410	0.00752432
53	rs4947488	7	55116555	0.0178973
53	rs4947965	7	55121812	0.0242989
53	rs11773818	7	55123968	0.0178973
53	rs11766798	7	55124319	0.0153712
53	rs7795564	7	55124829	0.553309
53	rs17335891	7	55131064	0.00976694
53	rs12669701	7	55131670	0.0150043
53	rs917879	7	55137258	0.0193515
53	rs17514740	7	55146021	0.0763282
53	rs12535578	7	55154586	0.0280383
53	rs2302535	7	55154688	0.11798
53	rs11238349	7	55156071	0.038447
53	rs4947972	7	55161043	0.0100917
54	rs11769827	7	73313856	0.56898
54	rs11770437	7	73319809	0.411719
55	rs4556017	7	100632790	0.961771
56	rs6979964	7	102420427	0.0384524
56	rs2430070	7	102420805	0.0568524
56	rs7778418	7	102429704	0.315804
56	rs10953374	7	102442173	0.045209
56	rs6969054	7	102446569	0.0555094
56	rs6949391	7	102446863	0.0555094
56	rs10257317	7	102447056	0.0555094
56	rs10279449	7	102462636	0.0838346
56	rs1541519	7	102466741	0.0681971
56	rs10271184	7	102477176	0.103119
56	rs7800548	7	102481842	0.0681971
56	rs7794668	7	102510416	0.00894085
57	rs806188	7	127268806	0.0233688
57	rs806174	7	127291072	0.147321
57	rs806172	7	127297002	0.0922653
57	rs806169	7	127300668	0.201826
57	rs806166	7	127309934	0.0580799
57	rs712707	7	127322614	0.0271594
57	rs712715	7	127333136	0.0498325
57	rs712718	7	127346950	0.0498325
57	rs712719	7	127357644	0.0233688
57	rs56185520	7	127364310	0.0201187
57	rs12667197	7	127369147	0.0233688
57	rs12540484	7	127370040	0.0233688
57	rs4731377	7	127381201	0.0149369
57	rs17151229	7	127382155	0.0173304
57	rs11772303	7	127398962	0.0128814
57	rs10487497	7	127400667	0.0111149
57	rs62481385	7	127410711	0.0111149
57	rs765971	7	127420642	0.00959618
57	rs59140894	7	127430797	0.00828965
57	rs3757780	7	127435520	0.0111149
57	rs2402871	7	127439519	0.00959618
57	rs3757778	7	127456607	0.00828965
57	rs17151377	7	127458009	0.00619652
57	rs67338333	7	127461701	0.00828965
57	rs12539411	7	127468928	0.00619652
57	rs3824003	7	127469624	0.00716505
57	rs1419967	7	127474435	0.00716505
57	rs12668077	7	127476253	0.00959618
57	rs62481416	7	127478125	0.00716505
57	rs4728079	7	127480364	0.00716505
57	rs58106688	7	127483211	0.00828965
57	rs62481419	7	127488007	0.00828965
57	rs2058457	7	127493657	0.00716505
57	rs882694	7	127496768	0.00716505
57	rs10954164	7	127533877	0.00716505
58	rs2912053	8	6645793	0.98466
59	rs4592028	8	22449484	0.00452658
59	rs11785755	8	22453223	0.0214102
59	rs11783129	8	22453426	0.0185371
59	rs3735894	8	22454826	0.0214102
59	rs71513892	8	22456517	0.0185371
59	rs2272718	8	22457388	0.0214102
59	rs746011	8	22457804	0.0104757
59	rs34268501	8	22460204	0.0214102
59	rs3735901	8	22462374	0.0443818
59	rs11777808	8	22462755	0.0383175
59	rs11778693	8	22462852	0.0383175
59	rs7843828	8	22463623	0.0443818
59	rs2291231	8	22463912	0.0443818
59	rs2291232	8	22464064	0.0443818
59	rs2291234	8	22464390	0.0383175
59	rs34269854	8	22465160	0.0331005
59	rs34027561	8	22465385	0.0443818
59	rs6999893	8	22465427	0.00440624
59	rs11136092	8	22466488	0.0383175
59	rs7843616	8	22466541	0.0514351
59	rs13271626	8	22467760	0.0691999
59	rs6986550	8	22467870	0.0058534
59	rs720746	8	22471399	0.0443818
59	rs3736147	8	22471824	0.0331005
59	rs11781149	8	22473158	0.0443818
59	rs7843128	8	22473465	0.00779436
59	rs6558167	8	22473850	0.00675251
59	rs57594397	8	22475657	0.0383175
59	rs11136093	8	22479988	0.0104757
59	rs1809452	8	22491397	0.0139194
59	rs35952885	8	22491622	0.0139194
59	rs11776549	8	22493124	0.012072
59	rs4872527	8	22496048	0.00909563
59	rs4242434	8	22501830	0.0160586
59	rs13264187	8	22506098	0.0139194
59	rs10099846	8	22534178	0.00452658
59	rs10095121	8	22538426	0.00452658
60	rs7844508	8	71602995	0.010335
60	rs13252808	8	71616655	0.0527565
60	rs13280922	8	71625398	0.0527565
60	rs11989644	8	71641196	0.0527565
60	rs13272884	8	71641648	0.0527565
60	rs13281864	8	71642573	0.0527565
60	rs13269690	8	71644807	0.0380313
60	rs7016334	8	71654406	0.0380313
60	rs28376252	8	71659887	0.0380313
60	rs6991708	8	71668528	0.0527565
60	rs7838421	8	71672323	0.0380313
60	rs7012796	8	71676193	0.0380313
60	rs2380689	8	71681983	0.0380313
60	rs1838392	8	71682583	0.0527565
60	rs7845516	8	71685822	0.0527565
60	rs7013495	8	71693517	0.0380313
60	rs10429277	8	71701391	0.0527565
60	rs11994908	8	71721619	0.0198009
60	rs13273979	8	71737322	0.0198009
60	rs62508859	8	71740934	0.0143009
60	rs13271606	8	71741723	0.010335
60	rs6983845	8	71746480	0.0074736
60	rs13255849	8	71752753	0.0198009
60	rs6472548	8	71754299	0.0143009
60	rs1156956	8	71755038	0.0143009
60	rs6984056	8	71771121	0.010335
60	rs4446768	8	71777589	0.010335
60	rs7003794	8	71789146	0.0074736
60	rs13255749	8	71801821	0.0074736
60	rs11985482	8	71810578	0.0074736
60	rs7838671	8	71811292	0.0074736
60	rs4581086	8	71814640	0.010335
60	rs13248937	8	71818749	0.010335
60	rs6984663	8	71827665	0.010335
61	rs2581260	8	77493526	0.995876
62	rs10956488	8	130717755	0.961845
63	rs7461753	8	144981498	0.00597241
63	rs7015048	8	144984283	0.00306258
63	rs7840395	8	144984956	0.00306258
63	rs4977183	8	144985200	0.00306258
63	rs11777835	8	144986103	0.00412201
63	rs7155	8	144989462	0.00294341
63	rs1065837	8	144990335	0.00343816
63	rs55836855	8	144999417	0.00343816
63	rs55646585	8	144999621	0.0167981
63	rs56117011	8	144999642	0.00343816
63	rs35916068	8	144999684	0.00343816
63	rs7002152	8	145000056	0.00401845
63	rs7016860	8	145000221	0.00401845
63	rs6993953	8	145000321	0.00401845
63	rs7006770	8	145000602	0.00401845
63	rs7017644	8	145000740	0.00401845
63	rs7017789	8	145000809	0.00401845
63	rs56401829	8	145000898	0.00469947
63	rs55895668	8	145001031	0.00401845
63	rs55984967	8	145001300	0.00469947
63	rs55812715	8	145001311	0.00469947
63	rs11782890	8	145001372	0.00469947
63	rs11136333	8	145001509	0.00469947
63	rs11136334	8	145001588	0.00549917
63	rs3135109	8	145001784	0.00549917
63	rs11993233	8	145002283	0.00549917
63	rs62522555	8	145002431	0.00549917
63	rs72693398	8	145002536	0.00549917
63	rs11136335	8	145003777	0.00597241
63	rs62522556	8	145005450	0.0129906
63	rs11136336	8	145007187	0.0273508
63	rs7003580	8	145007534	0.0447716
63	rs6989119	8	145007947	0.0322149
63	rs11136337	8	145007989	0.00950386
63	rs11782331	8	145008342	0.0273508
63	rs11783772	8	145008443	0.0273508
63	rs11783799	8	145008560	0.0273508
63	rs11782433	8	145008706	0.0273508
63	rs6994460	8	145008931	0.0528279
63	rs6983908	8	145009593	0.0447716
63	rs11784762	8	145009610	0.0197502
63	rs6988767	8	145010305	0.0447716
63	rs56034811	8	145010514	0.0447716
63	rs11784417	8	145010752	0.0167981
63	rs13439519	8	145012206	0.0379665
63	rs11136338	8	145012466	0.0121733
63	rs11784501	8	145013315	0.0447716
63	rs11136339	8	145013345	0.023235
63	rs4073081	8	145013893	0.0167981
63	rs4073082	8	145013949	0.0111081
63	rs12541377	8	145014424	0.00597241
63	rs112979447	8	145014732	0.00597241
63	rs56334578	8	145020025	0.00597241
63	rs12543539	8	145020477	0.00555992
63	rs12549853	8	145020636	0.00696873
63	rs7464572	8	145021167	0.00597241
63	rs7462197	8	145021428	0.00813587
63	rs7832643	8	145022657	0.0129906
63	rs55754956	8	145023739	0.00751564
63	rs11778018	8	145026450	0.0208481
63	rs62523994	8	145026582	0.0152007
63	rs55786556	8	145027210	0.0177968
63	rs58579887	8	145028587	0.0244364
63	rs11777239	8	145031265	0.00597241
63	rs10092179	8	145032302	0.0177968
63	rs11780978	8	145034852	0.00754342
63	rs7357417	8	145035342	0.00884282
63	rs7010330	8	145036615	0.00549917
63	rs11783655	8	145037573	0.00643878
63	rs72695409	8	145039400	0.00549917
63	rs6993022	8	145040108	0.00401845
63	rs11787365	8	145041333	0.00377235
64	rs10757277	9	22124450	0.02427
64	rs10757278	9	22124477	0.02427
64	rs1333047	9	22124504	0.520459
64	rs4977575	9	22124744	0.392585
65	rs10992304	9	95085365	0.0158626
65	rs10116813	9	95090360	0.00976714
65	rs10820968	9	95106443	0.0140407
[truncated: 1,324 more rows]
