# Supplementary material
Source: HighWire-hosted journal article supplement (https://gut.bmj.com/content/70/8/1538)
Supplement: inline-supplementary-material-8 [file inline-supplementary-material-8.xlsx]

## Sheet: Supplementary Table 7
Online Supplementary Table S7. Summary of HEM genes mapping and prioritization.
Gene symbol	EntrezID	EnsemblID	Gene type	Locus number	Lead SNP (rsID)	Prioritized HEM genes		Gene mapping					Gene prioritization
								FUMA_positional	FUMA_eQTL	MAGMA	DEPICT		DEPICT prioritized	Linked to fine mapped variant (probabliity>50%)	Expression in HEM tissue	WGCNA module	Mouse phenotypes from MGI	OMIM Phenotypes
BMP8B	656	ENSG00000116985	protein_coding	1	rs11585073	0		1	1	0	1		0	-	E	-	cellular; endocrine/exocrine gland; growth/size/body region; embryo; reproductive system; mortality/aging;	-
TRIT1	54802	ENSG00000043514	protein_coding	1	rs11585073	0		1	1	0	0		0	-	E (UQ)	-	growth/size/body region; cardiovascular system; mortality/aging; behavior/neurological; embryo;	Combined oxidative phosphorylation deficiency 35, 617873 (3), Autosomal recessive
RP1-118J21.25	101929536	ENSG00000261798	lncRNA	1	rs11585073	0		1	0	0	0		0	-	E	-	-	-
HPCAL4	51440	ENSG00000116983	protein_coding	1	rs11585073	0		0	1	0	0		0	-	E	-	behavior/neurological; integument;	-
MYCL	4610	ENSG00000116990	protein_coding	1	rs11585073	0		0	1	0	0		0	-	E	-	mortality/aging; hematopoietic system; immune system;	-
OXCT2	64064	ENSG00000198754	protein_coding	1	rs11585073	0		0	1	0	0		0	-	E	M1	-	-
PPIE	10450	ENSG00000084072	protein_coding	1	rs11585073	0		0	1	0	0		0	-	E (UQ)	-	-	-
RP1-39G22.7	-	ENSG00000259943	lncRNA	1	rs11585073	0		0	1	0	0		0	-	E	M1	-	-
SLC44A3	126969	ENSG00000143036	protein_coding	2	rs11578225	0		1	1	1	1		0	-	E (UQ)	M4	vision/eye; cardiovascular system;	-
LINC01057	101928079	ENSG00000224081	transcribed_processed_pseudogene	2	rs11578225	0		1	1	0	1		0	-	E	M4	-	-
MIR378G	100616321	ENSG00000263526	miRNA	2	rs11578225	0		1	0	0	0		0	-	E	-	-	-
RP4-639F20.1	729970	ENSG00000235501	lncRNA	2	rs11578225	0		0	1	0	0		0	-	E	M1	-	-
F5	2153	ENSG00000198734	protein_coding	3	rs145163454	0		1	0	0	1		0	-	E	-	integument; homeostasis/metabolism; embryo; behavior/neurological; liver/biliary system; mortality/aging; cardiovascular system;	{Pregnancy loss, recurrent, susceptibility to, 1}, 614389 (3), Autosomal dominant; Thrombophilia due to activated protein C resistance, 188055 (3), Autosomal dominant; {Thrombophilia, susceptibility to, due to factor V Leiden}, 188055 (3), Autosomal dominant; Factor V deficiency, 227400 (3), Autosomal recessive; {Budd-Chiari syndrome}, 600880 (3), Autosomal recessive; {Stroke, ischemic, susceptib…
ATP1B1	481	ENSG00000143153	protein_coding	3	rs145163454	0		1	1	0	0		0	-	E (UQ)	M4	cardiovascular system; mortality/aging; respiratory system; homeostasis/metabolism; muscle;	[Blood pressure regulation QTL], 145500 (2), Multifactorial
NME7	29922	ENSG00000143156	protein_coding	3	rs145163454	0		1	1	0	0		0	-	E (UQ)	M1	nervous system; skeleton; respiratory system; mortality/aging; craniofacial; cellular; growth/size/body region;	-
SLC19A2	10560	ENSG00000117479	protein_coding	3	rs145163454	0		1	1	0	0		0	-	E	M7	immune system; hearing/vestibular/ear; nervous system; hematopoietic system; reproductive system; mortality/aging; behavior/neurological; homeostasis/metabolism; cellular; endocrine/exocrine gland;	Thiamine-responsive megaloblastic anemia syndrome, 249270 (3), Autosomal recessive
BLZF1	8548	ENSG00000117475	protein_coding	3	rs145163454	0		1	0	0	0		0	-	E (UQ)	-	-	-
CCDC181	57821	ENSG00000117477	protein_coding	3	rs145163454	0		1	0	0	0		0	-	E	M1	-	-
RP4-800F24.1	-	ENSG00000235575	lncRNA	3	rs145163454	0		1	0	0	0		0	-	NE	-	-	-
RP5-1018K9.1	101928596	ENSG00000237707	lncRNA	3	rs145163454	0		1	0	0	0		0	-	NE	-	-	-
METTL18	92342	ENSG00000171806	protein_coding	3	rs145163454	0		0	1	0	0		0	-	E	-	-	-
MDM4	4194	ENSG00000198625	protein_coding	4	rs4951080	0		1	1	1	1		0	-	E (UQ)	-	muscle; cellular; homeostasis/metabolism; integument; growth/size/body region; endocrine/exocrine gland; pigmentation; limbs/digits/tail; nervous system; immune system; embryo; mortality/aging; hematopoietic system; cardiovascular system;	?Bone marrow failure syndrome 6, 618849 (3), Autosomal dominant
LRRN2	10446	ENSG00000170382	protein_coding	4	rs4951080	0		1	1	0	1		0	-	E	M7	behavior/neurological;	-
PIK3C2B	5287	ENSG00000133056	protein_coding	4	rs4951080	0		1	1	0	1		0	-	E (UQ)	M4	-	-
RP11-430C7.4	-	ENSG00000240710	lncRNA	4	rs4951080	0		1	1	0	1		0	-	NE	-	-	-
RP11-430C7.5	-	ENSG00000240219	lncRNA	4	rs4951080	0		1	1	0	0		0	-	E	-	-	-
RNA5SP74	100873308	ENSG00000200408	rRNA_pseudogene	4	rs4951080	0		1	0	0	0		0	-	NE	-	-	-
PPP1R15B	84919	ENSG00000158615	protein_coding	4	rs4951080	0		0	1	0	0		0	-	E (UQ)	-	integument; growth/size/body region; mortality/aging; hematopoietic system; liver/biliary system; behavior/neurological;	Microcephaly, short stature, and impaired glucose metabolism 2, 616817 (3), Autosomal recessive
RP11-392O17.1	-	ENSG00000228536	lncRNA	5	rs2605097	0		0	1	0	1		0	-	NE	-	-	-
GDF7	151449	ENSG00000143869	protein_coding	6	rs7594056	0		1	1	1	0		0	-	E	-	endocrine/exocrine gland; mortality/aging; reproductive system; nervous system; embryo;	-
C2orf43	60526	ENSG00000118961	protein_coding	6	rs7594056	0		1	1	0	1		0	-	E (UQ)	-	-	-
RP11-130L8.1	-	ENSG00000270100	lncRNA	6	rs7594056	0		1	1	0	0		0	-	E	-	-	-
BIRC6	57448	ENSG00000115760	protein_coding	7	rs6723226	0		1	1	0	1		0	-	E (UQ)	M4	endocrine/exocrine gland; growth/size/body region; integument; homeostasis/metabolism; cellular; nervous system; hematopoietic system; cardiovascular system; mortality/aging; liver/biliary system; embryo; immune system;	-
YIPF4	84272	ENSG00000119820	protein_coding	7	rs6723226	0		1	1	0	1		0	-	E (UQ)	-	-	-
NLRC4	58484	ENSG00000091106	protein_coding	7	rs6723226	0		1	1	0	0		0	-	E	M1	integument; cellular; homeostasis/metabolism; hematopoietic system; skeleton; immune system;	Autoinflammation with infantile enterocolitis, 616050 (3), Autosomal dominant; ?Familial cold autoinflammatory syndrome 4, 616115 (3), Autosomal dominant
AL133245.2	-	ENSG00000272754	lncRNA	7	rs6723226	0		1	0	0	0		0	-	E	-	-	-
BIRC6-AS1	100874009	ENSG00000230046	lncRNA	7	rs6723226	0		1	0	0	0		0	-	NE	-	-	-
MIR558	693143	ENSG00000207653	miRNA	7	rs6723226	0		1	0	0	0		0	-	NE	-	-	-
TTC27	55622	ENSG00000018699	protein_coding	7	rs6723226	0		1	0	0	0		0	-	E (UQ)	-	-	-
LINC00486	285045	ENSG00000230876	lncRNA	7	rs6723226	0		0	1	0	0		0	-	NE	-	-	-
SPAST	6683	ENSG00000021574	protein_coding	7	rs6723226	0		0	1	0	0		0	-	E	M4	growth/size/body region; reproductive system; behavior/neurological; nervous system;	Spastic paraplegia 4, autosomal dominant, 182601 (3), Autosomal dominant
XDH	7498	ENSG00000158125	protein_coding	7	rs6723226	0		0	1	0	0		0	-	E (UQ)	-	mortality/aging; immune system; renal/urinary system; integument; growth/size/body region; adipose tissue; endocrine/exocrine gland; cellular; homeostasis/metabolism; muscle;	Xanthinuria, type I, 278300 (3), Autosomal recessive
CRIM1	51232	ENSG00000150938	protein_coding	8	rs4670149	0		1	1	1	0		0	-	E (UQ)	-	limbs/digits/tail; nervous system; digestive/alimentary; vision/eye; immune system; renal/urinary system; skeleton; embryo; liver/biliary system; behavior/neurological; mortality/aging; cardiovascular system; muscle; craniofacial; cellular; homeostasis/metabolism; integument; endocrine/exocrine gland;	-
FEZ2	9637	ENSG00000171055	protein_coding	8	rs4670149	0		1	1	0	1		0	-	E (UQ)	-	-	-
SRBD1	55133	ENSG00000068784	protein_coding	9	rs728327	1		1	1	1	1		0	eQTL (rs728327, PP=0.669)	E	-	mortality/aging;	-
CAMKMT	79823	ENSG00000143919	protein_coding	9	rs728327	0		0	1	0	0		0	-	E	-	adipose tissue; growth/size/body region; homeostasis/metabolism; cellular; muscle; hematopoietic system; behavior/neurological; skeleton;	-
PIGF	5281	ENSG00000151665	protein_coding	9	rs728327	0		0	1	0	0		0	-	E (UQ)	M4	embryo; mortality/aging; skeleton; adipose tissue; growth/size/body region;	-
EHBP1	23301	ENSG00000115504	protein_coding	10	rs4671051	0		1	0	1	1		0	-	E (UQ)	-	-	{Prostate cancer, hereditary, 12}, 611868 (3)
OTX1	5013	ENSG00000115507	protein_coding	10	rs4671051	1		1	1	0	1		0	-	E	M7_hub	growth/size/body region; endocrine/exocrine gland; homeostasis/metabolism; vision/eye; craniofacial; reproductive system; mortality/aging; behavior/neurological; skeleton; nervous system; hearing/vestibular/ear; digestive/alimentary;	-
AC007098.1	-	ENSG00000226605	lncRNA	10	rs4671051	0		1	0	0	0		0	-	NE	-	-	-
AC009501.4	100132215	ENSG00000231609	lncRNA	10	rs4671051	0		1	0	0	0		0	-	E	M7	-	-
MDH1	4190	ENSG00000014641	polymorphic_pseudogene	10	rs4671051	0		0	1	1	0		0	-	E (UQ)	-	mortality/aging; homeostasis/metabolism;	-
AC092155.4	-	ENSG00000226622	lncRNA	10	rs4671051	0		0	1	0	1		0	-	NE	-	-	-
DBIL5P2	100169989	ENSG00000242412	transcribed_processed_pseudogene	10	rs4671051	0		0	0	0	1		0	-	E	-	-	-
TMEM17	200728	ENSG00000186889	protein_coding	10	rs4671051	0		0	1	0	0		0	-	E	-	-	-
WDPCP	51057	ENSG00000143951	protein_coding	10:11	rs4671051:rs34532102	0		0	1	1	1		0	-	E	-	vision/eye; digestive/alimentary; limbs/digits/tail; nervous system; hearing/vestibular/ear; renal/urinary system; respiratory system; embryo; cardiovascular system; mortality/aging; craniofacial; cellular; growth/size/body region;	?Bardet-Biedl syndrome 15, 615992 (3), Autosomal recessive; ?Congenital heart defects, hamartomas of tongue, and polysyndactyly, 217085 (3), Autosomal recessive
SERTAD2	9792	ENSG00000179833	protein_coding	11	rs34532102	1		1	0	1	1		1	-	E (UQ)	-	immune system; liver/biliary system; hematopoietic system; adipose tissue; cellular; homeostasis/metabolism; integument; growth/size/body region;	-
AC010987.5	-	ENSG00000235495	lncRNA	12	rs2861709	0		1	0	0	0		0	-	NE	-	-	-
ETAA1	54465	ENSG00000143971	protein_coding	12	rs2861709	0		0	0	1	0		0	-	E	M1	-	-
AC010987.6	101927701	ENSG00000237013	lncRNA	12	rs2861709	0		0	0	0	1		0	-	E	-	-	-
AC015969.3	-	ENSG00000203395	lncRNA	12	rs2861709	0		0	1	0	0		0	-	NE	-	-	-
PLEK	5341	ENSG00000115956	protein_coding	12	rs2861709	1		0	1	0	0		0	-	E- (UQ)	-	hematopoietic system; homeostasis/metabolism;	-
MERTK	10461	ENSG00000153208	protein_coding	13	rs57116599	0		1	1	1	1		0	-	E	-	cardiovascular system; hematopoietic system; mortality/aging; reproductive system; pigmentation; digestive/alimentary; nervous system; vision/eye; immune system; endocrine/exocrine gland; homeostasis/metabolism; cellular;	Retinitis pigmentosa 38, 613862 (3), Autosomal recessive
TMEM87B	84910	ENSG00000153214	protein_coding	13	rs57116599	0		1	1	0	1		0	-	E (UQ)	-	-	-
AC012442.5	-	ENSG00000243389	lncRNA	13	rs57116599	0		1	1	0	0		0	-	NE	-	-	-
NT5DC4	284958	ENSG00000144130	protein_coding	13	rs57116599	0		1	1	0	0		0	-	E	-	-	-
SLC20A1	6574	ENSG00000144136	protein_coding	13	rs57116599	1		1	1	0	0		0	-	E+ (UQ)	-	homeostasis/metabolism; cellular; growth/size/body region; integument; immune system; skeleton; embryo; liver/biliary system; cardiovascular system; hematopoietic system; mortality/aging;	-
CKAP2L	150468	ENSG00000169607	protein_coding	13	rs57116599	0		1	0	0	0		0	-	E	-	-	Filippi syndrome, 272440 (3), Autosomal recessive
IL1A	3552	ENSG00000115008	protein_coding	13	rs57116599	0		1	0	0	0		0	-	E	-	immune system; cardiovascular system; neoplasm; homeostasis/metabolism; integument;	-
IL1F10	84639	ENSG00000136697	protein_coding	13	rs57116599	0		1	0	0	0		0	-	E	M7	-	-
IL36A	27179	ENSG00000136694	protein_coding	13	rs57116599	1		1	0	0	0		0	-	E+	M7	limbs/digits/tail; immune system; homeostasis/metabolism; growth/size/body region; integument;	-
IL36B	27177	ENSG00000136696	protein_coding	13	rs57116599	0		1	0	0	0		0	-	E	M7	-	-
IL36RN	26525	ENSG00000136695	protein_coding	13	rs57116599	0		1	0	0	0		0	-	E (UQ)	M7	homeostasis/metabolism; integument; immune system; hematopoietic system;	Psoriasis 14, pustular, 614204 (3), Autosomal recessive
IL37	27178	ENSG00000125571	protein_coding	13	rs57116599	0		1	0	0	0		0	-	E	-	-	-
AC016683.5	-	ENSG00000234174	lncRNA	13	rs57116599	0		0	1	0	0		0	-	NE	-	-	-
AC079922.3	-	ENSG00000237753	lncRNA	13	rs57116599	0		0	1	0	0		0	-	E	-	-	-
CHCHD5	84269	ENSG00000125611	protein_coding	13	rs57116599	0		0	1	0	0		0	-	E (UQ)	-	-	-
FBLN7	129804	ENSG00000144152	protein_coding	13	rs57116599	0		0	1	0	0		0	-	E	-	cellular; homeostasis/metabolism; renal/urinary system;	-
IL1RN	3557	ENSG00000136689	protein_coding	13	rs57116599	0		0	1	0	0		0	-	E (UQ)	M7	skeleton; immune system; cardiovascular system; hematopoietic system; integument; mortality/aging; reproductive system; homeostasis/metabolism; cellular; growth/size/body region;	{Gastric cancer risk after H. pylori infection}, 137215 (3), Autosomal dominant; {Microvascular complications of diabetes 4}, 612628 (3); Interleukin 1 receptor antagonist deficiency, 612852 (3), Autosomal recessive
PAX8	7849	ENSG00000125618	protein_coding	13	rs57116599	0		0	1	0	0		0	-	E	-	endocrine/exocrine gland; growth/size/body region; craniofacial; homeostasis/metabolism; cellular; embryo; cardiovascular system; reproductive system; mortality/aging; vision/eye; limbs/digits/tail; hearing/vestibular/ear; nervous system; skeleton;	Hypothyroidism, congenital, due to thyroid dysgenesis or hypoplasia, 218700 (3), Autosomal dominant
PAX8-AS1	654433	ENSG00000189223	lncRNA	13	rs57116599	0		0	1	0	0		0	-	E (UQ)	M4	-	-
POLR1B	84172	ENSG00000125630	protein_coding	13	rs57116599	0		0	1	0	0		0	-	E (UQ)	-	embryo; mortality/aging; cellular;	-
PSD4	23550	ENSG00000125637	protein_coding	13	rs57116599	0		0	1	0	0		0	-	E (UQ)	M4	-	-
RGPD8	727851	ENSG00000169629	protein_coding	13	rs57116599	0		0	1	0	0		0	-	E	-	-	-
TTL	150465	ENSG00000114999	protein_coding	13	rs57116599	0		0	1	0	0		0	-	E (UQ)	M1	homeostasis/metabolism; cellular; mortality/aging; nervous system; behavior/neurological; respiratory system;	-
TEX41	401014	ENSG00000226674	lncRNA	14	rs7423637	0		1	1	0	1		0	-	E	-	-	-
ZEB2	9839	ENSG00000169554	protein_coding	14	rs7423637	0		0	1	0	0		0	-	E	M1	integument; endocrine/exocrine gland; craniofacial; cellular; embryo; mortality/aging; neoplasm; pigmentation; nervous system; vision/eye;	Mowat-Wilson syndrome, 235730 (3), Autosomal dominant
ACVR2A	92	ENSG00000121989	protein_coding	15	rs7559714	0		1	1	1	0		0	-	E	M4	embryo; reproductive system; mortality/aging; vision/eye; digestive/alimentary; skeleton; cellular; homeostasis/metabolism; endocrine/exocrine gland; growth/size/body region; craniofacial;	-
ORC4	5000	ENSG00000115947	protein_coding	15	rs7559714	0		1	1	1	0		0	-	E (UQ)	-	-	Meier-Gorlin syndrome 2, 613800 (3), Autosomal recessive
AC009480.3	-	ENSG00000223911	lncRNA	15	rs7559714	0		1	1	0	0		0	-	NE	-	-	-
MBD5	55777	ENSG00000204406	protein_coding	15	rs7559714	0		1	1	0	0		0	-	E	M1	craniofacial; homeostasis/metabolism; integument; growth/size/body region; adipose tissue; endocrine/exocrine gland; limbs/digits/tail; nervous system; skeleton; behavior/neurological; liver/biliary system; mortality/aging; cardiovascular system;	Mental retardation, autosomal dominant 1, 156200 (3), Autosomal dominant
RNA5SP106	106478994	ENSG00000253083	rRNA_pseudogene	15	rs7559714	0		1	0	0	0		0	-	NE	-	-	-
RNU6-1275P	106480122	ENSG00000212389	snRNA	15	rs7559714	0		1	0	0	0		0	-	NE	-	-	-
ITGB6	3694	ENSG00000115221	protein_coding	16	rs4233681	1		1	1	1	1		1	-	E (UQ)	M4	homeostasis/metabolism; integument; immune system; hematopoietic system; respiratory system;	Amelogenesis imperfecta, type IH, 616221 (3), Autosomal recessive
PLA2R1	22925	ENSG00000153246	protein_coding	16	rs4233681	0		1	1	1	1		0	-	E	M7	immune system;	-
RBMS1	5937	ENSG00000153250	protein_coding	16	rs4233681	0		1	1	1	0		0	-	E (UQ)	-	embryo; reproductive system; mortality/aging; cardiovascular system; homeostasis/metabolism; integument; growth/size/body region;	-
AC009961.3	29994	ENSG00000226266	lncRNA	16	rs4233681	0		0	1	0	0		0	-	E	-	-	-
LY75	4065	ENSG00000054219	protein_coding	16	rs4233681	0		0	1	0	0		0	-	E	M4	immune system; mortality/aging; hematopoietic system;	-
LY75-CD302	100526664	ENSG00000248672	protein_coding	16	rs4233681	0		0	1	0	0		0	-	E	-	-	-
MLTK	51776	ENSG00000091436	protein_coding	17	rs13017210	1		1	1	1	1		1	-	E (UQ)	M1_hub	-	-
MLK7-AS1	339751	ENSG00000238133	lncRNA	17	rs13017210	1		1	1	0	1		0	-	E+	M7	-	-
HOXD11	3237	ENSG00000128713	protein_coding	18	rs847148	1		1	0	1	1		1	-	E	M4	reproductive system; skeleton; limbs/digits/tail;	-
HOXD12	3238	ENSG00000170178	protein_coding	18	rs847148	0		1	0	1	1		0	-	E	-	digestive/alimentary; limbs/digits/tail; skeleton; muscle;	-
HOXD10	3236	ENSG00000128710	protein_coding	18	rs847148	0		1	0	1	0		0	-	E (UQ)	M4	reproductive system; behavior/neurological; skeleton; nervous system; limbs/digits/tail;	Charcot-Marie-Tooth disease, foot deformity of, 192950 (3), Autosomal dominant; Vertical talus, congenital, 192950 (3), Autosomal dominant
HOXD13	3239	ENSG00000128714	protein_coding	18	rs847148	0		1	0	0	0		0	-	E (UQ)	-	reproductive system; embryo; skeleton; renal/urinary system; limbs/digits/tail; digestive/alimentary; integument; growth/size/body region; endocrine/exocrine gland; muscle;	Brachydactyly, type D, 113200 (3), Autosomal dominant; Brachydactyly, type E, 113300 (3), Autosomal dominant; ?Brachydactyly-syndactyly syndrome, 610713 (3); Syndactyly, type V, 186300 (3), Autosomal dominant; Synpolydactyly 1, 186000 (3), Autosomal dominant
AC009336.24	-	ENSG00000226363	lncRNA	18	rs847148	0		0	1	0	0		0	-	E	-	-	-
HOXD-AS1	401022	ENSG00000224189	lncRNA	18	rs847148	0		0	1	0	0		0	-	E	-	-	-
HOXD1	3231	ENSG00000128645	protein_coding	18	rs847148	0		0	1	0	0		0	-	E	-	craniofacial; integument; nervous system; skeleton; behavior/neurological;	-
HOXD8	3234	ENSG00000175879	protein_coding	18	rs847148	0		0	1	0	0		0	-	E	M1	skeleton;	-
KIAA1715	80856	ENSG00000144320	protein_coding	18	rs847148	0		0	1	0	0		0	-	E (UQ)	M4	-	-
COL5A2	1290	ENSG00000204262	protein_coding	19	rs16831319	1		1	1	0	1		1	-	E (UQ)	M1	integument; growth/size/body region; vision/eye; mortality/aging; cardiovascular system; respiratory system; behavior/neurological; skeleton;	Ehlers-Danlos syndrome, classic type, 2, 130010 (3), Autosomal dominant
WDR75	84128	ENSG00000115368	protein_coding	19	rs16831319	0		1	0	0	1		0	-	E (UQ)	-	-	-
MIR3129	100422908	ENSG00000264725	miRNA	19	rs16831319	0		1	0	0	0		0	-	E	-	-	-
TMEM194B	100131211	ENSG00000189362	protein_coding	19:20	rs16831319:rs34417560	0		1	1	1	1		0	-	E	-	-	-
AC093388.3	-	ENSG00000233654	lncRNA	19:20	rs16831319:rs34417560	0		1	1	0	0		0	-	E	-	-	-
AC006460.2	-	ENSG00000228509	lncRNA	19:20	rs16831319:rs34417560	0		0	1	0	0		0	-	E	-	-	-
NAB1	4664	ENSG00000138386	protein_coding	19:20	rs16831319:rs34417560	0		0	1	0	0		0	-	E (UQ)	-	-	-
MFSD6	54842	ENSG00000151690	protein_coding	20	rs34417560	1		1	1	1	1		0	-	E (UQ)	M4_hub	-	-
RP11-647K16.1	-	ENSG00000272979	lncRNA	20	rs34417560	0		1	0	0	0		0	-	E	M1	-	-
C2orf88	84281	ENSG00000187699	protein_coding	20	rs34417560	1		0	1	0	0		0	-	E+ (UQ)	-	-	-
HIBCH	26275	ENSG00000198130	protein_coding	20	rs34417560	0		0	1	0	0		0	-	E (UQ)	M4	mortality/aging;	3-hydroxyisobutryl-CoA hydrolase deficiency, 250620 (3), Autosomal recessive
INPP1	3628	ENSG00000151689	protein_coding	20	rs34417560	0		0	1	0	0		0	-	E (UQ)	-	hematopoietic system; vision/eye; immune system; skeleton; growth/size/body region;	-
MYO1B	4430	ENSG00000128641	protein_coding	20	rs34417560	0		0	1	0	0		0	-	E (UQ)	-	-	-
STAT4	6775	ENSG00000138378	protein_coding	20	rs34417560	0		0	1	0	0		0	-	E	-	endocrine/exocrine gland; homeostasis/metabolism; cellular; renal/urinary system; hematopoietic system; mortality/aging; immune system;	{Systemic lupus erythematosus, susceptibility to, 11}, 612253 (3)
FGD5	152273	ENSG00000154783	protein_coding	21	rs1689549	0		1	1	0	1		0	-	E	M1	mortality/aging;	-
AC090957.2	-	ENSG00000230172	lncRNA	21	rs1689549	0		1	0	0	0		0	-	NE	-	-	-
C3orf20	84077	ENSG00000131379	protein_coding	21	rs1689549	0		1	0	0	0		0	-	E	-	reproductive system;	-
RP11-95M5.1	152274	ENSG00000260902	lncRNA	21	rs1689549	0		1	0	0	0		0	-	E	M4	-	-
FGD5-AS1	100505641	ENSG00000225733	lncRNA	21	rs1689549	0		0	1	0	0		0	-	E (UQ)	-	-	-
LSM3	27258	ENSG00000170860	protein_coding	21	rs1689549	0		0	1	0	0		0	-	E (UQ)	-	immune system; mortality/aging; homeostasis/metabolism;	-
ALAS1	211	ENSG00000023330	protein_coding	22	rs9847710	0		1	1	1	1		0	-	E (UQ)	-	mortality/aging; embryo; growth/size/body region;	-
NT5DC2	64943	ENSG00000168268	protein_coding	22	rs9847710	1		1	1	1	1		1	-	E (UQ)	M7	behavior/neurological; hearing/vestibular/ear;	-
SFMBT1	51460	ENSG00000163935	protein_coding	22	rs9847710	0		1	1	1	1		0	-	E	-	-	-
STAB1	23166	ENSG00000010327	protein_coding	22	rs9847710	0		1	1	1	1		0	-	E (UQ)	-	-	-
GLT8D1	55830	ENSG00000016864	protein_coding	22	rs9847710	0		1	1	1	0		0	-	E (UQ)	-	nervous system;	-
GNL3	26354	ENSG00000163938	protein_coding	22	rs9847710	0		1	1	1	0		0	-	E (UQ)	M4	embryo; respiratory system; mortality/aging; nervous system; growth/size/body region; cellular;	-
ITIH1	3697	ENSG00000055957	protein_coding	22	rs9847710	0		1	1	1	0		0	-	E	-	-	-
ITIH3	3699	ENSG00000162267	protein_coding	22	rs9847710	0		1	1	1	0		0	-	E	M1	-	-
ITIH4	3700	ENSG00000055955	protein_coding	22	rs9847710	0		1	1	1	0		0	-	E	-	endocrine/exocrine gland; reproductive system;	-
MUSTN1	389125	ENSG00000272573	protein_coding	22	rs9847710	0		1	1	1	0		0	-	E	M1	-	-
NEK4	6787	ENSG00000114904	protein_coding	22	rs9847710	0		1	1	1	0		0	-	E	-	-	-
PBRM1	55193	ENSG00000163939	protein_coding	22	rs9847710	0		1	1	1	0		0	-	E (UQ)	M1	renal/urinary system; immune system; mortality/aging; hematopoietic system; cardiovascular system; behavior/neurological; liver/biliary system; respiratory system; embryo; cellular;	-
RFT1	91869	ENSG00000163933	protein_coding	22	rs9847710	0		1	1	1	0		0	-	E (UQ)	-	mortality/aging; hematopoietic system; immune system;	Congenital disorder of glycosylation, type In, 612015 (3), Autosomal recessive
RP11-894J14.5	-	ENSG00000272305	protein_coding	22	rs9847710	0		1	1	1	0		0	-	E	M4	-	-
RP5-966M1.6	-	ENSG00000243696	protein_coding	22	rs9847710	0		1	1	1	0		0	-	E	M1	-	-
SMIM4	440957	ENSG00000168273	protein_coding	22	rs9847710	0		1	1	1	0		0	-	E (UQ)	-	-	-
SPCS1	28972	ENSG00000114902	protein_coding	22	rs9847710	0		1	1	1	0		0	-	E (UQ)	M4	-	-
TLR9	54106	ENSG00000173366	protein_coding	22	rs9847710	0		1	1	1	0		0	-	E	-	cellular; mortality/aging; hematopoietic system; immune system; digestive/alimentary;	-
TMEM110	375346	ENSG00000213533	protein_coding	22	rs9847710	0		1	1	1	0		0	-	E	M1	-	-
TMEM110-MUSTN1	100526772	ENSG00000248592	protein_coding	22	rs9847710	0		1	1	1	0		0	-	E	M1	-	-
DNAH1	25981	ENSG00000114841	protein_coding	22	rs9847710	0		1	1	0	1		0	-	E	-	integument; cellular; respiratory system; reproductive system;	?Ciliary dyskinesia, primary, 37, 617577 (3), Autosomal recessive; Spermatogenic failure 18, 617576 (3), Autosomal recessive
GLYCTK	132158	ENSG00000168237	protein_coding	22	rs9847710	0		1	1	0	1		0	-	E	M4	vision/eye;	D-glyceric aciduria, 220120 (3), Autosomal recessive
GLYCTK-AS1	100874110	ENSG00000242797	lncRNA	22	rs9847710	0		1	1	0	1		0	-	E	-	-	-
NISCH	11188	ENSG00000010322	protein_coding	22	rs9847710	0		1	1	0	1		0	-	E (UQ)	-	growth/size/body region; adipose tissue; craniofacial; homeostasis/metabolism; behavior/neurological; respiratory system; mortality/aging; hearing/vestibular/ear; immune system; skeleton;	-
PHF7	51533	ENSG00000010318	protein_coding	22	rs9847710	0		1	1	0	1		0	-	E	-	reproductive system;	-
PPM1M	132160	ENSG00000164088	protein_coding	22	rs9847710	0		1	1	0	1		0	-	E	-	homeostasis/metabolism; hematopoietic system; skeleton; immune system;	-
RP5-1157M23.2	101929054	ENSG00000243224	lncRNA	22	rs9847710	0		1	1	0	1		0	-	E	-	-	-
SEMA3G	56920	ENSG00000010319	protein_coding	22	rs9847710	0		1	1	0	1		0	-	E	-	immune system;	-
TNNC1	7134	ENSG00000114854	protein_coding	22	rs9847710	0		1	1	0	1		0	-	E	-	nervous system; mortality/aging; cardiovascular system; behavior/neurological; muscle; endocrine/exocrine gland;	Cardiomyopathy, hypertrophic, 13, 613243 (3), Autosomal dominant; Cardiomyopathy, dilated, 1Z, 611879 (3)
TWF2	11344	ENSG00000247596	protein_coding	22	rs9847710	0		1	1	0	1		0	-	E (UQ)	-	-	-
WDR82	80335	ENSG00000164091	protein_coding	22	rs9847710	0		1	1	0	1		0	-	E (UQ)	-	-	-
BAP1	8314	ENSG00000163930	protein_coding	22	rs9847710	0		1	0	0	1		0	-	E (UQ)	-	cardiovascular system; hematopoietic system; reproductive system; mortality/aging; neoplasm; embryo; respiratory system; immune system; digestive/alimentary; growth/size/body region; integument; endocrine/exocrine gland; homeostasis/metabolism; cellular; muscle;	Tumor predisposition syndrome, 614327 (3), Autosomal dominant
ITIH4-AS1	100873993	ENSG00000239799	lncRNA	22	rs9847710	0		1	1	0	0		0	-	NE	-	-	-
MIR135A1	406925	ENSG00000207926	miRNA	22	rs9847710	1		1	1	0	0		0	-	E-	-	-	-
SNORD19B	100113381	ENSG00000238862	snoRNA	22	rs9847710	0		1	1	0	0		0	-	E	-	-	-
TLR9	54106	ENSG00000239732	protein_coding	22	rs9847710	0		1	1	0	0		0	-	E	-	cellular; mortality/aging; hematopoietic system; immune system; digestive/alimentary;	-
MIRLET7G	406890	ENSG00000199150	miRNA	22	rs9847710	0		1	0	0	0		0	-	E (UQ)	-	-	-
RNU6-856P	106481451	ENSG00000252768	snRNA	22	rs9847710	0		1	0	0	0		0	-	NE	-	-	-
RNU6ATAC16P	106479550	ENSG00000221518	snRNA	22	rs9847710	0		1	0	0	0		0	-	NE	-	-	-
SNORD19	692089	ENSG00000212493	snoRNA	22	rs9847710	0		1	0	0	0		0	-	NE	-	-	-
SNORD19	109616991	ENSG00000222345	snoRNA	22	rs9847710	0		1	0	0	0		0	-	E	-	-	-
SNORD19B	100113381	ENSG00000252787	snoRNA	22	rs9847710	0		1	0	0	0		0	-	E	-	-	-
SNORD69	692109	ENSG00000212452	snoRNA	22	rs9847710	1		1	0	0	0		0	-	E- (UQ)	-	-	-
ABHD14A	25864	ENSG00000248487	protein_coding	22	rs9847710	0		0	1	0	0		0	-	E	M1	-	-
DUSP7	1849	ENSG00000164086	protein_coding	22	rs9847710	1		0	1	0	0		0	-	E (UQ)	M7_hub	homeostasis/metabolism; integument; pigmentation; reproductive system;	-
GPR62	118442	ENSG00000180929	protein_coding	22	rs9847710	0		0	1	0	0		0	-	E	M7	-	-
PARP3	10039	ENSG00000041880	protein_coding	22	rs9847710	0		0	1	0	0		0	-	E	M4	-	-
PCBP4	57060	ENSG00000090097	protein_coding	22	rs9847710	0		0	1	0	0		0	-	E	-	renal/urinary system; respiratory system; neoplasm; cellular; growth/size/body region;	-
POC1A	25886	ENSG00000164087	protein_coding	22	rs9847710	0		0	1	0	0		0	-	E	-	behavior/neurological; reproductive system; mortality/aging; skeleton; homeostasis/metabolism; cellular; endocrine/exocrine gland; growth/size/body region;	Short stature, onychodysplasia, facial dysmorphism, and hypotrichosis, 614813 (3), Autosomal recessive
PRKCD	5580	ENSG00000163932	protein_coding	22	rs9847710	0		0	1	0	0		0	-	E (UQ)	M4	liver/biliary system; cardiovascular system; hematopoietic system; mortality/aging; digestive/alimentary; nervous system; skeleton; renal/urinary system; homeostasis/metabolism; immune system; cellular; endocrine/exocrine gland; growth/size/body region; muscle;	Autoimmune lymphoproliferative syndrome, type III, 615559 (3), Autosomal recessive
RAD54L2	23132	ENSG00000164080	protein_coding	22	rs9847710	0		0	1	0	0		0	-	E (UQ)	-	mortality/aging; embryo; nervous system; growth/size/body region; cellular;	-
RPL29	6159	ENSG00000162244	protein_coding	22	rs9847710	0		0	1	0	0		0	-	E (UQ)	-	skeleton; embryo; mortality/aging; reproductive system; cellular; growth/size/body region;	-
TKT	7086	ENSG00000163931	protein_coding	22	rs9847710	0		0	1	0	0		0	-	E (UQ)	-	liver/biliary system; behavior/neurological; reproductive system; mortality/aging; cardiovascular system; nervous system; vision/eye; renal/urinary system; growth/size/body region; endocrine/exocrine gland; adipose tissue;	Short stature, developmental delay, and congenital heart defects, 617044 (3), Autosomal recessive
FOXP1	27086	ENSG00000114861	protein_coding	23	rs2597301	1		1	0	1	1		1	-	E (UQ)	M1	immune system; behavior/neurological; hematopoietic system; cardiovascular system; mortality/aging; muscle; homeostasis/metabolism; cellular; adipose tissue; growth/size/body region;	Mental retardation with language impairment and with or without autistic features, 613670 (3), Autosomal dominant
RNU6-281P	106481267	ENSG00000206939	snRNA	23	rs2597301	0		1	0	0	0		0	-	NE	-	-	-
GPR27	2850	ENSG00000170837	protein_coding	23	rs2597301	0		0	1	0	0		0	-	E	-	-	-
PHLDB2	90102	ENSG00000144824	protein_coding	24	rs6792493	1		1	1	1	1		1	-	E (UQ)	M1_hub	behavior/neurological; nervous system; vision/eye;	-
PLCXD2	257068	ENSG00000240891	protein_coding	24	rs6792493	0		1	1	1	1		0	-	E	M7	-	-
TAGLN3	29114	ENSG00000144834	protein_coding	24	rs6792493	0		0	0	1	0		0	-	E	-	-	-
CD96	10225	ENSG00000153283	protein_coding	24	rs6792493	0		0	1	0	0		0	-	E	-	homeostasis/metabolism; hematopoietic system; neoplasm; immune system;	C syndrome, 211750 (3), Autosomal dominant
ZBTB20	26137	ENSG00000181722	protein_coding	25	rs9853475	1		1	1	1	1		1	eQTL (rs9853475, PP=0.599)	E	M1	cardiovascular system; mortality/aging; liver/biliary system; behavior/neurological; vision/eye; nervous system; growth/size/body region; integument; homeostasis/metabolism;	Primrose syndrome, 259050 (3), Autosomal dominant
RP11-6F2.5	105374177	ENSG00000241544	lncRNA	26	rs900400	0		1	1	0	1		0	-	NE	-	-	-
LINC00880	339894	ENSG00000243629	lncRNA	26	rs900400	0		1	0	0	1		0	-	E	-	-	-
LINC00881	100498859	ENSG00000241135	lncRNA	26	rs900400	0		1	1	0	0		0	-	E	M4	-	-
CCNL1	57018	ENSG00000163660	protein_coding	26	rs900400	0		0	1	0	0		0	-	E (UQ)	-	-	-
LINC00886	730091	ENSG00000240875	lncRNA	26	rs900400	0		0	1	0	0		0	-	E	-	-	-
TIPARP	25976	ENSG00000163659	protein_coding	26	rs900400	0		0	1	0	0		0	-	E (UQ)	-	nervous system; digestive/alimentary; immune system; renal/urinary system; skeleton; mortality/aging; reproductive system; cardiovascular system; hematopoietic system; endocrine/exocrine gland; muscle; craniofacial; homeostasis/metabolism; integument; growth/size/body region;	-
IFT80	57560	ENSG00000068885	protein_coding	27	rs3851366	0		1	1	1	1		0	-	E	-	mortality/aging; skeleton; limbs/digits/tail; growth/size/body region; cellular; homeostasis/metabolism; craniofacial;	Short-rib thoracic dysplasia 2 with or without polydactyly, 611263 (3), Autosomal recessive
KPNA4	3840	ENSG00000186432	protein_coding	27	rs3851366	0		1	1	1	1		0	-	E (UQ)	-	-	-
SMC4	10051	ENSG00000113810	protein_coding	27	rs3851366	0		1	1	1	1		0	-	E (UQ)	-	-	-
TRIM59	286827	ENSG00000213186	protein_coding	27	rs3851366	0		1	1	1	1		0	-	E	-	nervous system; embryo; growth/size/body region; reproductive system; mortality/aging;	-
RP11-432B6.3	100174949	ENSG00000248710	protein_coding	27	rs3851366	0		1	1	1	0		0	-	E	-	-	-
C3orf80	401097	ENSG00000180044	protein_coding	27	rs3851366	0		1	0	0	0		0	-	E	-	-	-
IL12A-AS1	101928376	ENSG00000244040	lncRNA	27	rs3851366	0		1	0	0	0		0	-	E	M7	-	-
MIR15B	406949	ENSG00000207779	miRNA	27	rs3851366	0		1	0	0	0		0	-	E (UQ)	-	-	-
MIR16-2	406951	ENSG00000198987	miRNA	27	rs3851366	0		1	0	0	0		0	-	E	-	-	-
RNU7-136P	106479076	ENSG00000238427	snRNA	27	rs3851366	0		1	0	0	0		0	-	NE	-	-	-
SCARNA7	677767	ENSG00000238741	scaRNA	27	rs3851366	0		1	0	0	0		0	-	E	-	-	-
KRT8P12	90133	ENSG00000229320	transcribed_processed_pseudogene	27	rs3851366	1		0	0	0	1		1	-	E	-	-	-
ARL14	80117	ENSG00000179674	protein_coding	27	rs3851366	1		0	1	0	0		0	-	E+ (UQ)	-	-	-
LINC01100	730109	ENSG00000242107	lncRNA	27	rs3851366	0		0	1	0	0		0	-	NE	-	-	-
ACOX3	8310	ENSG00000087008	protein_coding	28	rs2631752	0		1	1	1	1		0	-	E	M7	vision/eye;	-
TRMT44	152992	ENSG00000155275	protein_coding	28	rs2631752	0		1	1	0	1		0	-	E	-	-	-
RP11-689P11.2	-	ENSG00000205959	lncRNA	28	rs2631752	0		1	1	0	0		0	-	E	M7	-	-
RP11-774O3.3	-	ENSG00000251615	lncRNA	28	rs2631752	0		1	1	0	0		0	-	E	-	-	-
RNA5SP152	100873418	ENSG00000202054	rRNA_pseudogene	28	rs2631752	0		1	0	0	0		0	-	NE	-	-	-
RP11-689P11.3	-	ENSG00000251186	lncRNA	28	rs2631752	0		1	0	0	0		0	-	NE	-	-	-
AFAP1	60312	ENSG00000196526	protein_coding	28	rs2631752	0		0	1	0	0		0	-	E (UQ)	-	integument; endocrine/exocrine gland; cellular; behavior/neurological;	-
CPZ	8532	ENSG00000109625	protein_coding	28	rs2631752	0		0	1	0	0		0	-	E	M1	-	-
LIAS	11019	ENSG00000121897	protein_coding	29	rs2687965	1		1	1	0	1		0	eQTL (rs2687965, PP=0.502)	E	M4	embryo; cardiovascular system; mortality/aging; nervous system; growth/size/body region; homeostasis/metabolism;	Hyperglycinemia, lactic acidosis, and seizures, 614462 (3), Autosomal recessive
UGDH	7358	ENSG00000109814	protein_coding	29	rs2687965	1		1	1	0	1		0	eQTL (rs2687965, PP=0.502)	E (UQ)	-	endocrine/exocrine gland; growth/size/body region; craniofacial; digestive/alimentary; mortality/aging; embryo; vision/eye;	Epileptic encephalopathy, early infantile, 84, 618792 (3), Autosomal recessive
KLB	152831	ENSG00000134962	protein_coding	29	rs2687965	1		1	1	0	0		0	eQTL (rs2687965, PP=0.502)	E	-	growth/size/body region; adipose tissue; endocrine/exocrine gland; homeostasis/metabolism; liver/biliary system;	-
SMIM14	201895	ENSG00000163683	protein_coding	29	rs2687965	1		0	1	0	0		0	eQTL (rs2687965, PP=0.502)	E (UQ)	-	-	-
UGDH-AS1	100885776	ENSG00000249348	lncRNA	29	rs2687965	1		0	1	0	0		0	eQTL (rs2687965, PP=0.502)	E	-	-	-
RPL9	6133	ENSG00000163682	protein_coding	29	rs2687965	1		0	1	0	0		0	eQTL (rs2687965, PP=0.502)	E (UQ)	-	-	-
BTC	685	ENSG00000174808	protein_coding	30	rs11942410	0		1	1	1	1		0	-	E	M1	endocrine/exocrine gland; growth/size/body region; craniofacial; muscle; homeostasis/metabolism; immune system; liver/biliary system; respiratory system; reproductive system; mortality/aging; cardiovascular system; hematopoietic system; vision/eye; skeleton;	-
MTHFD2L	441024	ENSG00000163738	protein_coding	30	rs11942410	0		0	1	0	0		0	-	E	-	integument; cardiovascular system;	-
RP11-44F21.3	100507388	ENSG00000249717	lncRNA	30	rs11942410	0		0	1	0	0		0	-	E	-	-	-
RP11-542G1.3	441025	ENSG00000251383	lncRNA	30	rs11942410	0		0	1	0	0		0	-	NE	-	-	-
RP11-567N4.3	-	ENSG00000250735	lncRNA	30	rs11942410	0		0	1	0	0		0	-	E	-	-	-
BMPR1B	658	ENSG00000138696	protein_coding	31	rs28663472	0		1	1	1	1		0	-	E	M1	endocrine/exocrine gland; cellular; vision/eye; reproductive system; skeleton; nervous system; limbs/digits/tail;	Brachydactyly, type A2, 112600 (3), Autosomal dominant; Brachydactyly, type A1, D, 616849 (3), Autosomal dominant; Acromesomelic dysplasia, Demirhan type, 609441 (3), Autosomal recessive
UNC5C	8633	ENSG00000182168	protein_coding	31	rs28663472	1		1	1	0	1		1	-	E	-	behavior/neurological; reproductive system; mortality/aging; nervous system; growth/size/body region; adipose tissue; cellular;	-
TET2	54790	ENSG00000168769	protein_coding	32	rs6839705	0		1	1	1	1		0	-	E	M7	renal/urinary system; immune system; liver/biliary system; neoplasm; mortality/aging; growth/size/body region; hematopoietic system; cardiovascular system; cellular; endocrine/exocrine gland;	Myelodysplastic syndrome, somatic, 614286 (3)
TET2-AS1	104384744	ENSG00000251586	lncRNA	32	rs6839705	0		1	1	0	0		0	-	NE	-	-	-
AC004069.2	-	ENSG00000251259	lncRNA	32	rs6839705	0		1	0	0	0		0	-	E	-	-	-
RP11-556I14.1	-	ENSG00000248373	lncRNA	32	rs6839705	0		1	0	0	0		0	-	NE	-	-	-
PPA2	27068	ENSG00000138777	protein_coding	32	rs6839705	0		0	1	0	1		0	-	E (UQ)	M4	-	?Sudden cardiac failure, alcohol-induced, 617223 (3), Autosomal recessive; Sudden cardiac failure, infantile, 617222 (3), Autosomal recessive
AC096732.2	-	ENSG00000226655	lncRNA	33	rs2060285	0		1	0	0	0		0	-	NE	-	-	-
LINC01091	285419	ENSG00000249464	lncRNA	33	rs2060285	0		1	0	0	0		0	-	E	-	-	-
FAT4	79633	ENSG00000196159	protein_coding	33:34	rs2060285:rs17824374	1		0	1	0	1		1	-	E	M1	embryo; respiratory system; mortality/aging; cardiovascular system; nervous system; hearing/vestibular/ear; limbs/digits/tail; digestive/alimentary; skeleton; renal/urinary system; growth/size/body region; cellular;	Van Maldergem syndrome 2, 615546 (3), Autosomal recessive; Hennekam lymphangiectasia-lymphedema syndrome 2, 616006 (3), Autosomal recessive
RP11-318I4.1	-	ENSG00000251649	lncRNA	34	rs17824374	0		1	0	0	0		0	-	NE	-	-	-
RP11-361D14.2	-	ENSG00000261129	lncRNA	35	rs1542726	0		1	0	0	0		0	-	E	-	-	-
ABCE1	6059	ENSG00000164163	protein_coding	35	rs1542726	0		0	0	1	0		0	-	E (UQ)	-	homeostasis/metabolism; endocrine/exocrine gland; mortality/aging; vision/eye; nervous system; immune system; behavior/neurological; reproductive system;	-
HHIP-AS1	646576	ENSG00000248890	lncRNA	35	rs1542726	0		0	1	0	1		0	-	E	-	-	-
FREM3	166752	ENSG00000183090	protein_coding	35	rs1542726	0		0	1	0	0		0	-	E	M1	-	-
HHIP	64399	ENSG00000164161	protein_coding	35	rs1542726	0		0	1	0	0		0	-	E	-	immune system; digestive/alimentary; nervous system; hematopoietic system; mortality/aging; embryo; respiratory system; cellular; growth/size/body region; endocrine/exocrine gland;	-
OTUD4	54726	ENSG00000164164	protein_coding	35	rs1542726	0		0	1	0	0		0	-	E	-	mortality/aging;	-
RP11-673E1.1	101927636	ENSG00000251600	lncRNA	35	rs1542726	0		0	1	0	0		0	-	E	-	-	-
TPPP	11076	ENSG00000171368	protein_coding	36	rs72707023	0		1	1	1	1		0	-	E	M7	growth/size/body region; homeostasis/metabolism; skeleton; behavior/neurological; hematopoietic system; nervous system;	-
CEP72	55722	ENSG00000112877	protein_coding	36	rs72707023	0		1	1	1	0		0	-	E	-	-	-
SLC9A3	6550	ENSG00000066230	protein_coding	36	rs72707023	0		1	1	1	0		0	-	E	-	endocrine/exocrine gland; homeostasis/metabolism; cardiovascular system; reproductive system; digestive/alimentary; renal/urinary system;	Diarrhea 8, secretory sodium, congenital, 616868 (3), Autosomal recessive
CTD-2589H19.6	-	ENSG00000271781	lncRNA	36	rs72707023	0		1	1	0	0		0	-	E	M7	-	-
RP11-310P5.1	-	ENSG00000249650	lncRNA	36	rs72707023	0		1	1	0	0		0	-	NE	-	-	-
MIR4456	100616381	ENSG00000264233	miRNA	36	rs72707023	0		1	0	0	0		0	-	NE	-	-	-
RP11-310P5.2	-	ENSG00000250385	lncRNA	36	rs72707023	0		1	0	0	0		0	-	NE	-	-	-
AHRR	57491	ENSG00000063438	protein_coding	36	rs72707023	0		0	1	0	0		0	-	E	-	homeostasis/metabolism; neoplasm; behavior/neurological; hearing/vestibular/ear;	-
BRD9	65980	ENSG00000028310	protein_coding	36	rs72707023	0		0	1	0	0		0	-	E (UQ)	-	mortality/aging;	-
C5orf55	116349	ENSG00000221990	lncRNA	36	rs72707023	0		0	1	0	0		0	-	E	-	-	-
CCDC127	133957	ENSG00000164366	protein_coding	36	rs72707023	0		0	1	0	0		0	-	E (UQ)	M1	homeostasis/metabolism;	-
CTD-2228K2.5	25845	ENSG00000188242	lncRNA	36	rs72707023	0		0	1	0	0		0	-	E	-	-	-
CTD-2228K2.7	-	ENSG00000225138	lncRNA	36	rs72707023	0		0	1	0	0		0	-	E (UQ)	M7	-	-
CTD-2245E15.3	-	ENSG00000251532	lncRNA	36	rs72707023	0		0	1	0	0		0	-	NE	-	-	-
EXOC3	11336	ENSG00000180104	protein_coding	36	rs72707023	0		0	1	0	0		0	-	E (UQ)	-	growth/size/body region;	-
PDCD6	10016	ENSG00000249915	protein_coding	36	rs72707023	0		0	1	0	0		0	-	E (UQ)	-	-	-
ZDHHC11	79844	ENSG00000188818	protein_coding	36	rs72707023	0		0	1	0	0		0	-	E	-	hearing/vestibular/ear;	-
ZDHHC11B	653082	ENSG00000206077	protein_coding	36	rs72707023	0		0	1	0	0		0	-	E	-	hearing/vestibular/ear;	-
FBXL7	23194	ENSG00000183580	protein_coding	37	rs61026653	1		1	0	1	1		1	-	E	M1_hub	-	-
CTD-2350J17.1	101929472	ENSG00000250250	lncRNA	37	rs61026653	0		0	0	0	1		0	-	NE	-	-	-
CTC-461F20.1	-	ENSG00000250415	lncRNA	37	rs61026653	0		0	1	0	0		0	-	NE	-	-	-
ISL1	3670	ENSG00000016082	protein_coding	38:39	rs62368263:rs4485884	1		1	0	1	1		0	-	E	M1_hub	endocrine/exocrine gland; growth/size/body region; craniofacial; cellular; homeostasis/metabolism; immune system; behavior/neurological; embryo; mortality/aging; cardiovascular system; vision/eye; limbs/digits/tail; hearing/vestibular/ear; nervous system; digestive/alimentary; skeleton;	-
CTD-2314G24.2	-	ENSG00000259663	lncRNA	38:39	rs62368263:rs4485884	0		1	0	0	0		0	-	E	M1	-	-
CTD-2335O3.3	-	ENSG00000251125	lncRNA	38:39	rs62368263:rs4485884	0		1	0	0	0		0	-	NE	-	-	-
FAM172A	83989	ENSG00000113391	protein_coding	40	rs6867042	0		1	1	1	1		0	-	E	M1	endocrine/exocrine gland; liver/biliary system; hematopoietic system; immune system;	-
KIAA0825	285600	ENSG00000185261	protein_coding	40	rs6867042	0		1	0	1	1		0	-	E	M7	reproductive system; skeleton; renal/urinary system; nervous system; adipose tissue; growth/size/body region; homeostasis/metabolism;	Polydactyly, postaxial, type A10, 618498 (3), Autosomal recessive
POU5F2	134187	ENSG00000248483	protein_coding	40	rs6867042	0		1	0	1	1		0	-	E	-	reproductive system;	-
RP11-549J18.1	-	ENSG00000251023	lncRNA	40	rs6867042	0		1	1	0	1		0	-	E	-	-	-
RP11-185E12.2	-	ENSG00000272406	lncRNA	40	rs6867042	0		1	0	0	0		0	-	NE	-	-	-
NR2F1	7025	ENSG00000175745	protein_coding	40	rs6867042	1		0	0	1	1		1	-	E	-	growth/size/body region; cellular; mortality/aging; embryo; behavior/neurological; hearing/vestibular/ear; nervous system;	Bosch-Boonstra-Schaaf optic atrophy syndrome, 615722 (3), Autosomal dominant
NR2F1-AS1	441094	ENSG00000237187	lncRNA	40	rs6867042	0		0	0	0	1		0	-	E	M1	-	-
RGMB	285704	ENSG00000174136	protein_coding	41	rs1563319	0		0	1	0	1		0	-	E	-	mortality/aging;	-
RGMB-AS1	503569	ENSG00000246763	lncRNA	41	rs1563319	0		0	1	0	0		0	-	E	-	-	-
CTC-340A15.2	102546299	ENSG00000241956	lncRNA	42	rs12153515	0		1	1	0	1		0	-	E	-	-	-
CTB-181F24.1	-	ENSG00000254066	lncRNA	42	rs12153515	0		1	0	0	0		0	-	NE	-	-	-
CTC-535M15.2	-	ENSG00000253693	lncRNA	42	rs12153515	0		1	0	0	0		0	-	NE	-	-	-
EXOC2	55770	ENSG00000112685	protein_coding	43	rs4959352	0		1	0	1	1		0	-	E (UQ)	-	cellular; embryo; mortality/aging;	-
HUS1B	135458	ENSG00000188996	protein_coding	43	rs4959352	0		1	0	0	0		0	-	E	-	-	-
RP11-532F6.3	-	ENSG00000272463	lncRNA	43	rs4959352	0		0	1	0	0		0	-	E	M1	-	-
RP11-532F6.5	-	ENSG00000271911	lncRNA	43	rs4959352	0		0	1	0	0		0	-	E	M1	-	-
GMDS	2762	ENSG00000112699	protein_coding	43:44	rs4959352:rs722587	0		1	1	1	1		0	-	E (UQ)	M4	hematopoietic system; behavior/neurological; skeleton; immune system; growth/size/body region; homeostasis/metabolism; craniofacial;	-
MYLK4	340156	ENSG00000145949	protein_coding	43:44	rs4959352:rs722587	0		0	1	0	0		0	-	E	M7	-	-
CAP2	10486	ENSG00000112186	protein_coding	45	rs10807610	0		1	1	1	1		0	-	E	M1	cardiovascular system; mortality/aging; behavior/neurological; immune system; vision/eye; muscle; growth/size/body region; homeostasis/metabolism;	-
TRIM31	11074	ENSG00000204616	protein_coding	46	rs1156533	0		1	1	0	0		0	-	E (UQ)	M4	immune system; digestive/alimentary; hematopoietic system; homeostasis/metabolism; growth/size/body region;	-
TRIM31-AS1	104533120	ENSG00000231226	lncRNA	46	rs1156533	0		1	1	0	0		0	-	E	-	-	-
ABCF1	23	ENSG00000204574	protein_coding	46	rs1156533	0		0	1	0	0		0	-	E (UQ)	-	mortality/aging;	-
HCG18	414777	ENSG00000231074	lncRNA	46	rs1156533	0		0	1	0	0		0	-	E (UQ)	-	-	-
HCG22	285834	ENSG00000228789	lncRNA	46	rs1156533	0		0	1	0	0		0	-	E	M7	-	-
HCG9	10255	ENSG00000204625	lncRNA	46	rs1156533	0		0	1	0	0		0	-	E	-	-	-
HLA-A	3105	ENSG00000206503	protein_coding	46	rs1156533	0		0	1	0	0		0	-	E (UQ)	M4	-	{Hypersensitivity syndrome, carbamazepine-induced, susceptibility to}, 608579 (3)
HLA-C	3107	ENSG00000204525	protein_coding	46	rs1156533	0		0	1	0	0		0	-	E (UQ)	-	-	{Psoriasis susceptibility 1}, 177900 (3), Multifactorial; {HIV-1 viremia, susceptibility to}, 609423 (3)
HLA-E	3133	ENSG00000204592	protein_coding	46	rs1156533	0		0	1	0	0		0	-	E (UQ)	-	homeostasis/metabolism; hematopoietic system; immune system;	-
HLA-F	3134	ENSG00000204642	protein_coding	46	rs1156533	0		0	1	0	0		0	-	E (UQ)	M4	-	-
HLA-F-AS1	285830	ENSG00000214922	lncRNA	46	rs1156533	0		0	1	0	0		0	-	E	M1	-	-
HLA-G	3135	ENSG00000204632	protein_coding	46	rs1156533	0		0	1	0	0		0	-	E (UQ)	M4	homeostasis/metabolism; hematopoietic system; immune system;	{Asthma, susceptibility to}, 600807 (2), Autosomal dominant
MOG	4340	ENSG00000204655	protein_coding	46	rs1156533	0		0	1	0	0		0	-	E	-	immune system; hematopoietic system; cellular;	?Narcolepsy 7, 614250 (3), Autosomal dominant
MRPS18B	28973	ENSG00000204568	protein_coding	46	rs1156533	0		0	1	0	0		0	-	E (UQ)	M4	-	-
NRM	11270	ENSG00000137404	protein_coding	46	rs1156533	0		0	1	0	0		0	-	E	-	-	-
OR2H2	7932	ENSG00000204657	protein_coding	46	rs1156533	0		0	1	0	0		0	-	NE	-	-	-
PPP1R11	6992	ENSG00000204619	protein_coding	46	rs1156533	0		0	1	0	0		0	-	E (UQ)	-	-	-
PPP1R18	170954	ENSG00000146112	protein_coding	46	rs1156533	0		0	1	0	0		0	-	E (UQ)	M1	-	-
PRR3	80742	ENSG00000204576	protein_coding	46	rs1156533	0		0	1	0	0		0	-	E	M1	-	-
RNF39	80352	ENSG00000204618	protein_coding	46	rs1156533	0		0	1	0	0		0	-	E	M7	-	-
TRIM10	10107	ENSG00000204613	protein_coding	46	rs1156533	0		0	1	0	0		0	-	E	-	-	-
TRIM26	7726	ENSG00000234127	protein_coding	46	rs1156533	0		0	1	0	0		0	-	E (UQ)	M4	-	-
VARS2	57176	ENSG00000137411	protein_coding	46	rs1156533	0		0	1	0	0		0	-	E (UQ)	M7	mortality/aging; growth/size/body region;	Combined oxidative phosphorylation deficiency 20, 615917 (3), Autosomal recessive
ZFP57	346171	ENSG00000204644	protein_coding	46	rs1156533	0		0	1	0	0		0	-	E	-	mortality/aging; cellular;	Diabetes mellitus, transient neonatal, 1, 601410 (3), Autosomal dominant
ZNRD1	30834	ENSG00000066379	protein_coding	46	rs1156533	0		0	1	0	0		0	-	E (UQ)	-	-	-
ZNRD1-AS1	80862	ENSG00000204623	transcribed_unitary_pseudogene	46	rs1156533	0		0	1	0	0		0	-	E	-	-	-
DCBLD1	285761	ENSG00000164465	protein_coding	47	rs2180811	0		1	1	1	1		0	-	E	-	-	-
GOPC	57120	ENSG00000047932	protein_coding	47	rs2180811	0		1	1	1	1		0	-	E (UQ)	-	growth/size/body region; homeostasis/metabolism; cellular; vision/eye; mortality/aging; reproductive system; embryo;	-
ROS1	6098	ENSG00000047936	protein_coding	47	rs2180811	0		1	1	1	1		0	-	E	M4	reproductive system; cellular;	-
RNU6-253P	106480697	ENSG00000207461	snRNA	47	rs2180811	0		1	0	0	0		0	-	NE	-	-	-
RP1-92C8.3	-	ENSG00000226181	lncRNA	47	rs2180811	0		1	0	0	0		0	-	NE	-	-	-
FAM26F	441168	ENSG00000188820	protein_coding	47	rs2180811	0		0	1	0	0		0	-	E	-	-	-
GPRC6A	222545	ENSG00000173612	protein_coding	47	rs2180811	0		0	1	0	0		0	-	NE	-	integument; growth/size/body region; adipose tissue; endocrine/exocrine gland; cellular; homeostasis/metabolism; reproductive system; hematopoietic system; cardiovascular system; liver/biliary system; skeleton; renal/urinary system;	-
RWDD1	51389	ENSG00000111832	protein_coding	47	rs2180811	1		0	1	0	0		0	-	E- (UQ)	M1	homeostasis/metabolism; growth/size/body region; skeleton; immune system; hematopoietic system;	-
TCF21	6943	ENSG00000118526	protein_coding	48	rs2327426	1		1	1	0	1		1	-	E (UQ)	-	renal/urinary system; immune system; hematopoietic system; cardiovascular system; mortality/aging; reproductive system; respiratory system; homeostasis/metabolism; muscle; endocrine/exocrine gland; integument;	-
RP3-323P13.2	100507308	ENSG00000227954	lncRNA	48	rs2327426	0		1	1	0	0		0	-	E	-	-	-
RP4-662A9.2	-	ENSG00000223586	lncRNA	48	rs2327426	0		1	0	0	0		0	-	NE	-	-	-
RP1-283K11.2	-	ENSG00000234567	lncRNA	48	rs2327426	0		0	1	0	0		0	-	NE	-	-	-
ESR1	2099	ENSG00000091831	protein_coding	49:50	rs3020338:rs9322356	0		1	1	1	1		0	-	E	-	respiratory system; behavior/neurological; embryo; neoplasm; cardiovascular system; hematopoietic system; reproductive system; mortality/aging; nervous system; limbs/digits/tail; skeleton; renal/urinary system; homeostasis/metabolism; immune system; cellular; endocrine/exocrine gland; adipose tissue; growth/size/body region; integument; muscle;	{Myocardial infarction, susceptibility to}, 608446 (3); Estrogen resistance, 615363 (3), Autosomal recessive; Breast cancer, somatic, 114480 (3); {Migraine, susceptibility to}, 157300 (3), Autosomal dominant
THBS2	7058	ENSG00000186340	protein_coding	51	rs3253	1		1	1	1	1		1	-	E (UQ)	-	limbs/digits/tail; skeleton; behavior/neurological; neoplasm; mortality/aging; integument; cardiovascular system; hematopoietic system; muscle; cellular; homeostasis/metabolism;	{Lumbar disc herniation, susceptibility to}, 603932 (3)
RP11-417E7.1	101929484	ENSG00000223485	lncRNA	51	rs3253	0		1	1	0	0		0	-	E	M4	-	-
RP11-417E7.2	101929504	ENSG00000261039	lncRNA	51	rs3253	0		1	1	0	0		0	-	NE	-	-	-
XXyac-YX65C7_A.2	101929523	ENSG00000226445	lncRNA	51	rs3253	0		1	1	0	0		0	-	E	-	-	-
LINC00242	401288	ENSG00000229214	lncRNA	51	rs3253	0		0	1	0	0		0	-	E	-	-	-
SUGCT	79783	ENSG00000175600	protein_coding	52	rs6462976	0		1	0	1	1		0	-	E	M1	-	Glutaric aciduria III, 231690 (3), Autosomal recessive
EGFR	1956	ENSG00000146648	protein_coding	53	rs7795564	1		1	1	1	1		1	eQTL (rs7795564, PP=0.553)	E (UQ)	-	endocrine/exocrine gland; integument; growth/size/body region; craniofacial; muscle; cellular; immune system; homeostasis/metabolism; liver/biliary system; respiratory system; embryo; pigmentation; reproductive system; mortality/aging; hematopoietic system; cardiovascular system; vision/eye; limbs/digits/tail; nervous system; hearing/vestibular/ear; digestive/alimentary; renal/urinary system; ske…	?Inflammatory skin and bowel disease, neonatal, 2, 616069 (3), Autosomal recessive; Nonsmall cell lung cancer, response to tyrosine kinase inhibitor in, 211980 (3), Autosomal dominant, Somatic mutation; Adenocarcinoma of lung, response to tyrosine kinase inhibitor in, 211980 (3), Autosomal dominant, Somatic mutation; {Nonsmall cell lung cancer, susceptibility to}, 211980 (3), Autosomal dominant, …
ABHD11	83451	ENSG00000106077	protein_coding	54	rs11770437	1		1	1	0	0		0	eQTL (rs11769827, PP=0.569)	E (UQ)	-	endocrine/exocrine gland; renal/urinary system; skeleton; vision/eye; nervous system; reproductive system;	-
WBSCR27	155368	ENSG00000165171	protein_coding	54	rs11770437	1		1	1	0	0		0	eQTL (rs11769827, PP=0.569)	E	-	-	-
LIMK1	3984	ENSG00000106683	protein_coding	54	rs11770437	1		0	1	0	0		0	eQTL (rs11769827, PP=0.569)	E	-	cellular; behavior/neurological; nervous system;	-
ELN	2006	ENSG00000049540	protein_coding	54	rs11770437	1		1	0	1	1		1	-	E (UQ)	M1_hub	homeostasis/metabolism; muscle; cardiovascular system; mortality/aging; respiratory system;	Cutis laxa, autosomal dominant, 123700 (3), Autosomal dominant; Supravalvar aortic stenosis, 185500 (3), Autosomal dominant
WBSCR28	135886	ENSG00000175877	protein_coding	54	rs11770437	0		1	0	0	1		0	-	E	-	-	-
CLDN3	1365	ENSG00000165215	protein_coding	54	rs11770437	1		1	1	0	0		0	-	E+ (UQ)	-	behavior/neurological;	-
CLDN4	1364	ENSG00000189143	protein_coding	54	rs11770437	0		1	1	0	0		0	-	E (UQ)	-	mortality/aging; hematopoietic system; cardiovascular system; renal/urinary system; cellular; homeostasis/metabolism; growth/size/body region;	-
LINC00035	171022	ENSG00000225969	transcribed_unitary_pseudogene	54	rs11770437	0		1	1	0	0		0	-	E	-	-	-
CLIP2	7461	ENSG00000106665	protein_coding	54	rs11770437	0		0	0	1	0		0	-	E (UQ)	-	skeleton; nervous system; behavior/neurological; cellular; growth/size/body region;	-
FZD9	8326	ENSG00000188763	protein_coding	54	rs11770437	0		0	1	0	0		0	-	E	M4	growth/size/body region; endocrine/exocrine gland; cellular; skeleton; behavior/neurological; mortality/aging; hematopoietic system; nervous system; immune system;	-
NSUN5	55695	ENSG00000130305	protein_coding	54	rs11770437	0		0	1	0	0		0	-	E (UQ)	-	hematopoietic system; behavior/neurological; nervous system;	-
STX1A	6804	ENSG00000106089	protein_coding	54	rs11770437	0		0	1	0	0		0	-	E	M7	embryo; behavior/neurological; mortality/aging; nervous system; growth/size/body region; adipose tissue; homeostasis/metabolism;	-
VPS37D	155382	ENSG00000176428	protein_coding	54	rs11770437	0		0	1	0	0		0	-	E	-	vision/eye; mortality/aging; cardiovascular system; behavior/neurological; growth/size/body region;	-
TRIM56	81844	ENSG00000169871	protein_coding	55	rs4556017	1		1	1	0	0		0	eQTL (rs4556017, PP=0.962)	E (UQ)	-	hematopoietic system; immune system; homeostasis/metabolism; growth/size/body region;	-
ACHE	43	ENSG00000087085	protein_coding	55	rs4556017	1		0	1	0	0		0	eQTL (rs4556017, PP=0.962)	E (UQ)	M4	respiratory system; behavior/neurological; reproductive system; mortality/aging; hematopoietic system; nervous system; hearing/vestibular/ear; vision/eye; growth/size/body region; adipose tissue; muscle; craniofacial; homeostasis/metabolism;	[Blood group, Yt system], 112100 (3)
COPS6	10980	ENSG00000168090	protein_coding	55	rs4556017	1		0	1	0	0		0	eQTL (rs4556017, PP=0.962)	E (UQ)	-	mortality/aging; hematopoietic system; neoplasm; immune system; endocrine/exocrine gland; cellular; homeostasis/metabolism;	-
SRRT	51593	ENSG00000087087	protein_coding	55	rs4556017	1		0	1	0	0		0	eQTL (rs4556017, PP=0.962)	E (UQ)	M7	endocrine/exocrine gland; cellular; hematopoietic system; mortality/aging; embryo; immune system;	-
TRIP6	7205	ENSG00000087077	protein_coding	55	rs4556017	1		0	1	0	0		0	eQTL (rs4556017, PP=0.962)	E (UQ)	-	nervous system; immune system; skeleton; hematopoietic system; craniofacial;	-
MUC12	10071	ENSG00000205277	protein_coding	55	rs4556017	1		1	1	1	1		0	-	E+ (UQ)	-	-	-
MUC17	140453	ENSG00000169876	protein_coding	55	rs4556017	1		1	1	1	0		0	-	E+ (UQ)	-	-	-
RP11-395B7.4	102724094	ENSG00000227053	lncRNA	55	rs4556017	0		1	1	0	1		0	-	E	M1	-	-
MUC3A	4584	ENSG00000169894	protein_coding	55	rs4556017	0		1	1	0	0		0	-	E (UQ)	-	integument;	-
AP1S1	1174	ENSG00000106367	protein_coding	55	rs4556017	0		0	1	0	0		0	-	E (UQ)	M4	mortality/aging;	MEDNIK syndrome, 609313 (3), Autosomal recessive
CLDN15	24146	ENSG00000106404	protein_coding	55	rs4556017	0		0	1	0	0		0	-	E	-	digestive/alimentary; cellular; endocrine/exocrine gland;	-
EPHB4	2050	ENSG00000196411	protein_coding	55	rs4556017	0		0	1	0	0		0	-	E (UQ)	-	muscle; growth/size/body region; renal/urinary system; cardiovascular system; mortality/aging; embryo;	Capillary malformation-arteriovenous malformation 2, 618196 (3), Autosomal dominant; Lymphatic malformation 7, 617300 (3), Autosomal dominant
GIGYF1	64599	ENSG00000146830	protein_coding	55	rs4556017	0		0	1	0	0		0	-	E	-	-	-
MEPCE	56257	ENSG00000146834	protein_coding	55	rs4556017	0		0	1	0	0		0	-	E (UQ)	-	hematopoietic system; mortality/aging;	-
MIR25	407014	ENSG00000207547	miRNA	55	rs4556017	0		0	1	0	0		0	-	E (UQ)	-	-	-
MOSPD3	64598	ENSG00000106330	protein_coding	55	rs4556017	0		0	1	0	0		0	-	E	M7	cardiovascular system; mortality/aging; muscle;	-
NAT16	375607	ENSG00000167011	protein_coding	55	rs4556017	0		0	1	0	0		0	-	E	-	-	-
NYAP1	222950	ENSG00000166924	protein_coding	55	rs4556017	0		0	1	0	0		0	-	E	-	-	-
PCOLCE	5118	ENSG00000106333	protein_coding	55	rs4556017	0		0	1	0	0		0	-	E (UQ)	-	limbs/digits/tail; muscle; skeleton;	-
PILRB	29990	ENSG00000121716	protein_coding	55	rs4556017	0		0	1	0	0		0	-	E (UQ)	-	mortality/aging; homeostasis/metabolism; immune system;	-
RP11-758P17.2	-	ENSG00000241357	lncRNA	55	rs4556017	0		0	1	0	0		0	-	NE	-	-	-
SLC12A9	56996	ENSG00000146828	protein_coding	55	rs4556017	0		0	1	0	0		0	-	E	-	-	-
SPDYE3	441272	ENSG00000214300	protein_coding	55	rs4556017	0		0	1	0	0		0	-	E	-	-	-
STAG3L5P-PVRIG2P-PILRB	101752399	ENSG00000272752	lncRNA	55	rs4556017	0		0	1	0	0		0	-	E (UQ)	-	-	-
UFSP1	402682	ENSG00000176125	protein_coding	55	rs4556017	0		0	1	0	0		0	-	E	M4	-	-
ARMC10	83787	ENSG00000170632	protein_coding	56	rs7778418	0		1	1	1	1		0	-	E (UQ)	-	-	-
FAM185A	222234	ENSG00000222011	protein_coding	56	rs7778418	0		1	1	1	1		0	-	E	-	-	-
FBXL13	222235	ENSG00000161040	protein_coding	56	rs7778418	0		1	1	1	1		0	-	E	-	skeleton;	-
LRRC17	10234	ENSG00000128606	protein_coding	56	rs7778418	1		1	1	1	1		1	-	E	M1	-	-
NAPEPLD	222236	ENSG00000161048	protein_coding	56	rs7778418	0		1	1	1	1		0	-	E	-	homeostasis/metabolism; nervous system;	-
SLC26A5	375611	ENSG00000170615	protein_coding	56	rs7778418	0		1	1	1	0		0	-	E	-	growth/size/body region; hearing/vestibular/ear; nervous system;	?Deafness, autosomal recessive 61, 613865 (3), Autosomal recessive
NFE4	58160	ENSG00000230257	protein_coding	56	rs7778418	0		1	1	0	1		0	-	E	-	-	-
CTB-107G13.1	101927870	ENSG00000234715	lncRNA	56	rs7778418	0		1	1	0	0		0	-	E	M7	-	-
RELN	5649	ENSG00000189056	protein_coding	56	rs7778418	0		1	1	0	0		0	-	E	-	reproductive system; mortality/aging; behavior/neurological; skeleton; nervous system; digestive/alimentary; vision/eye; integument; growth/size/body region; adipose tissue; cellular; homeostasis/metabolism; muscle;	{Epilepsy, familial temporal lobe, 7}, 616436 (3), Autosomal dominant; Lissencephaly 2 (Norman-Roberts type), 257320 (3), Autosomal recessive
RP11-645N11.3	-	ENSG00000236226	lncRNA	56	rs7778418	0		1	1	0	0		0	-	NE	-	-	-
RNU6-1136P	106480066	ENSG00000252643	snRNA	56	rs7778418	0		1	0	0	0		0	-	NE	-	-	-
PMPCB	9512	ENSG00000105819	protein_coding	56	rs7778418	0		0	1	1	0		0	-	E (UQ)	-	mortality/aging; nervous system;	Multiple mitochondrial dysfunctions syndrome 6, 617954 (3), Autosomal recessive
DNAJC2	27000	ENSG00000105821	protein_coding	56	rs7778418	0		0	1	0	0		0	-	E (UQ)	-	-	-
LRWD1	222229	ENSG00000161036	protein_coding	56	rs7778418	0		0	1	0	0		0	-	E	-	-	-
ORC5	5001	ENSG00000164815	protein_coding	56	rs7778418	0		0	1	0	0		0	-	E (UQ)	-	-	-
POLR2J	5439	ENSG00000005075	protein_coding	56	rs7778418	0		0	1	0	0		0	-	E (UQ)	M4	-	-
POLR2J2	246721	ENSG00000228049	protein_coding	56	rs7778418	0		0	1	0	0		0	-	E	M4	-	-
POLR2J2	246721	ENSG00000267645	protein_coding	56	rs7778418	1		0	1	0	0		0	-	E (UQ)	M7_hub	-	-
POLR2J3	548644	ENSG00000168255	protein_coding	56	rs7778418	0		0	1	0	0		0	-	E (UQ)	M7	-	-
PRKRIP1	79706	ENSG00000128563	protein_coding	56	rs7778418	0		0	1	0	0		0	-	E (UQ)	-	-	-
RASA4	10156	ENSG00000105808	protein_coding	56	rs7778418	0		0	1	0	0		0	-	E (UQ)	-	cellular; immune system; hematopoietic system;	-
RASA4B	100271927	ENSG00000170667	protein_coding	56	rs7778418	0		0	1	0	0		0	-	E	-	-	-
RP11-514P8.6	-	ENSG00000205236	protein_coding	56	rs7778418	0		0	1	0	0		0	-	E	M7	-	-
SPDYE2	441273	ENSG00000205238	protein_coding	56	rs7778418	0		0	1	0	0		0	-	E	-	-	-
SPDYE2B	100310812	ENSG00000173678	protein_coding	56	rs7778418	0		0	1	0	0		0	-	E	-	-	-
UPK3BL	100134938	ENSG00000267368	protein_coding	56	rs7778418	1		0	1	0	0		0	-	E (UQ)	M7_hub	-	-
SND1	27044	ENSG00000197157	protein_coding	57	rs806169	0		1	1	1	1		0	-	E (UQ)	-	mortality/aging;	-
PAX4	5078	ENSG00000106331	protein_coding	57	rs806169	0		1	0	1	1		0	-	E	-	homeostasis/metabolism; endocrine/exocrine gland; mortality/aging; growth/size/body region; behavior/neurological;	Maturity-onset diabetes of the young, type IX, 612225 (3); Diabetes mellitus, type 2, 125853 (3), Autosomal dominant; {Diabetes mellitus, ketosis-prone, susceptibility to}, 612227 (3), Autosomal dominant, Autosomal recessive
LRRC4	64101	ENSG00000128594	protein_coding	57	rs806169	0		1	1	0	1		0	-	E	M7	hearing/vestibular/ear; behavior/neurological;	-
AC073934.6	-	ENSG00000240790	lncRNA	57	rs806169	0		1	0	0	0		0	-	NE	-	-	-
MIR593	693178	ENSG00000207588	miRNA	57	rs806169	0		1	0	0	0		0	-	NE	-	-	-
GCC1	79571	ENSG00000179562	protein_coding	57	rs806169	0		0	1	1	1		0	-	E	M4	-	-
FSCN3	29999	ENSG00000106328	protein_coding	57	rs806169	0		0	0	1	1		0	-	E (UQ)	-	-	-
CCDC136	64753	ENSG00000128596	protein_coding	57	rs806169	0		0	1	0	0		0	-	E	M1	cellular; reproductive system;	-
ZNF800	168850	ENSG00000048405	protein_coding	57	rs806169	0		0	1	0	0		0	-	E	-	-	-
ANGPT2	285	ENSG00000091879	protein_coding	58	rs2912053	0		1	1	1	1		0	-	E	M1	respiratory system; cardiovascular system; mortality/aging; vision/eye; digestive/alimentary; immune system; cellular; integument; homeostasis/metabolism;	-
MCPH1	79648	ENSG00000147316	protein_coding	58	rs2912053	0		1	1	1	1		0	-	E	-	cellular; homeostasis/metabolism; integument; growth/size/body region; endocrine/exocrine gland; pigmentation; nervous system; hearing/vestibular/ear; vision/eye; immune system; skeleton; behavior/neurological; reproductive system; mortality/aging; hematopoietic system; cardiovascular system;	Microcephaly 1, primary, autosomal recessive, 251200 (3), Autosomal recessive
GS1-24F4.2	100652791	ENSG00000245857	lncRNA	58	rs2912053	0		0	0	0	1		0	-	E	-	-	-
RP11-115C21.2	100287015	ENSG00000246089	lncRNA	58	rs2912053	0		0	1	0	0		0	-	E	-	-	-
BIN3	55909	ENSG00000147439	protein_coding	59	rs13271626	0		1	1	1	1		0	-	E (UQ)	-	immune system; respiratory system; liver/biliary system; neoplasm; hematopoietic system; vision/eye;	-
C8orf58	541565	ENSG00000241852	protein_coding	59	rs13271626	1		1	1	1	1		1	-	E	-	homeostasis/metabolism; integument;	-
CCAR2	57805	ENSG00000158941	protein_coding	59	rs13271626	0		1	1	1	1		0	-	E (UQ)	-	adipose tissue; growth/size/body region; immune system; homeostasis/metabolism; liver/biliary system; behavior/neurological;	-
PDLIM2	64236	ENSG00000120913	protein_coding	59	rs13271626	0		1	1	1	1		0	-	E (UQ)	M7	immune system; hematopoietic system;	-
AC037459.4	-	ENSG00000248235	protein_coding	59	rs13271626	0		1	1	1	0		0	-	E	M7	-	-
RP11-582J16.5	-	ENSG00000253200	lncRNA	59	rs13271626	0		1	1	0	1		0	-	E	-	-	-
CTD-3247F14.2	-	ENSG00000261026	lncRNA	59	rs13271626	0		1	1	0	0		0	-	E	-	-	-
EGR3	1960	ENSG00000179388	protein_coding	59	rs13271626	0		1	1	0	0		0	-	E	-	homeostasis/metabolism; muscle; behavior/neurological; skeleton; nervous system; vision/eye; mortality/aging;	-
RP11-459E5.1	-	ENSG00000253125	lncRNA	59	rs13271626	0		1	0	0	0		0	-	E	M1	-	-
EYA1	2138	ENSG00000104313	protein_coding	60	rs1838392	1		1	1	1	1		1	-	E	-	endocrine/exocrine gland; adipose tissue; growth/size/body region; craniofacial; muscle; cellular; homeostasis/metabolism; immune system; respiratory system; behavior/neurological; embryo; reproductive system; mortality/aging; cardiovascular system; hematopoietic system; vision/eye; hearing/vestibular/ear; nervous system; digestive/alimentary; skeleton; renal/urinary system;	?Otofaciocervical syndrome, 166780 (3), Autosomal dominant; Anterior segment anomalies with or without cataract, 602588 (3), Autosomal dominant; Branchiootorenal syndrome 1, with or without cataracts, 113650 (3), Autosomal dominant; Branchiootic syndrome 1, 602588 (3), Autosomal dominant
LACTB2	51110	ENSG00000147592	protein_coding	60	rs1838392	0		1	1	1	1		0	-	E	-	-	-
RP11-382J12.1	286190	ENSG00000246366	lncRNA	60	rs1838392	0		1	1	1	1		0	-	E	-	-	-
TRAM1	23471	ENSG00000067167	protein_coding	60	rs1838392	0		1	1	1	1		0	-	E (UQ)	-	-	-
XKR9	389668	ENSG00000221947	protein_coding	60	rs1838392	1		1	1	1	0		0	-	E+	M4	-	-
NCOA2	10499	ENSG00000140396	protein_coding	60	rs1838392	1		1	1	0	1		1	-	E	-	embryo; reproductive system; integument; growth/size/body region; cellular; endocrine/exocrine gland;	-
BTF3P12	652963	ENSG00000213003	processed_pseudogene	60	rs1838392	0		0	0	0	1		0	-	E	-	-	-
RP11-326E22.1	-	ENSG00000254031	lncRNA	60	rs1838392	0		0	1	0	0		0	-	NE	-	-	-
RP11-333A23.4	101926892	ENSG00000253967	lncRNA	60	rs1838392	0		0	1	0	0		0	-	E	-	-	-
ZFHX4-AS1	100192378	ENSG00000253661	lncRNA	61	rs2581260	0		1	0	0	1		0	-	E	-	-	-
RP11-115I9.1	-	ENSG00000253681	lncRNA	61	rs2581260	0		1	0	0	0		0	-	NE	-	-	-
GSDMC	56169	ENSG00000147697	protein_coding	62	rs10956488	1		0	1	0	0		0	eQTL (rs10956488, PP=0.962)	E	M7	-	-
GRINA	2907	ENSG00000178719	protein_coding	63	rs58579887	0		1	1	1	1		0	-	E (UQ)	-	-	-
PARP10	84875	ENSG00000178685	protein_coding	63	rs58579887	0		1	1	1	1		0	-	E (UQ)	-	nervous system;	-
PLEC	5339	ENSG00000178209	protein_coding	63	rs58579887	1		1	1	1	1		1	-	E (UQ)	-	integument; growth/size/body region; cellular; homeostasis/metabolism; muscle; mortality/aging; cardiovascular system; hematopoietic system; behavior/neurological; immune system; nervous system;	Muscular dystrophy, limb-girdle, autosomal recessive 17, 613723 (3), Autosomal recessive; Epidermolysis bullosa simplex with pyloric atresia, 612138 (3), Autosomal recessive; Epidermolysis bullosa simplex with muscular dystrophy, 226670 (3), Autosomal recessive; ?Epidermolysis bullosa simplex with nail dystrophy, 616487 (3), Autosomal recessive; Epidermolysis bullosa simplex, Ogna type, 131950 (3…
SPATC1	375686	ENSG00000186583	protein_coding	63	rs58579887	0		1	1	0	0		0	-	E	-	-	-
MIR661	724031	ENSG00000207574	miRNA	63	rs58579887	0		1	0	0	0		0	-	NE	-	-	-
AC084125.4	-	ENSG00000232600	lncRNA	63	rs58579887	0		0	1	0	0		0	-	NE	-	-	-
CPSF1	29894	ENSG00000071894	protein_coding	63	rs58579887	0		0	1	0	0		0	-	E (UQ)	-	-	Myopia 27, 618827 (3), Autosomal dominant
CTD-3065J16.6	-	ENSG00000204791	transcribed_unitary_pseudogene	63	rs58579887	0		0	1	0	0		0	-	E	-	-	-
FAM203A	51236	ENSG00000235173	protein_coding	63	rs58579887	0		0	1	0	0		0	-	E	-	-	-
GPAA1	8733	ENSG00000197858	protein_coding	63	rs58579887	0		0	1	0	0		0	-	E (UQ)	-	nervous system; mortality/aging; embryo; growth/size/body region;	Glycosylphosphatidylinositol biosynthesis defect 15, 617810 (3), Autosomal recessive
KIAA1875	340390	ENSG00000179698	protein_coding	63	rs58579887	0		0	1	0	0		0	-	E	-	-	-
MAF1	84232	ENSG00000179632	protein_coding	63	rs58579887	0		0	1	0	0		0	-	E (UQ)	-	homeostasis/metabolism; adipose tissue; growth/size/body region; reproductive system; mortality/aging; integument; liver/biliary system; behavior/neurological;	-
MROH1	727957	ENSG00000179832	protein_coding	63	rs58579887	0		0	1	0	0		0	-	E (UQ)	M4	-	-
NRBP2	340371	ENSG00000185189	protein_coding	63	rs58579887	0		0	1	0	0		0	-	E (UQ)	M1	hematopoietic system; immune system; homeostasis/metabolism;	-
OPLAH	26873	ENSG00000178814	protein_coding	63	rs58579887	0		0	1	0	0		0	-	E	M4	behavior/neurological; vision/eye;	5-oxoprolinase deficiency, 260005 (3), Autosomal dominant, Autosomal recessive
PPP1R16A	84988	ENSG00000160972	protein_coding	63	rs58579887	1		0	1	0	0		0	-	E (UQ)	M4_hub	-	-
RP11-299M14.2	-	ENSG00000255343	lncRNA	63	rs58579887	0		0	1	0	0		0	-	E	M1	-	-
RP11-661A12.9	-	ENSG00000255050	lncRNA	63	rs58579887	0		0	1	0	0		0	-	E	-	-	-
SHARPIN	81858	ENSG00000179526	protein_coding	63	rs58579887	0		0	1	0	0		0	-	E (UQ)	M4	digestive/alimentary; vision/eye; immune system; skeleton; respiratory system; liver/biliary system; reproductive system; hematopoietic system; cardiovascular system; craniofacial; cellular; homeostasis/metabolism; integument; growth/size/body region;	-
ZNF517	340385	ENSG00000197363	protein_coding	63	rs58579887	0		0	1	0	0		0	-	E	M1	-	-
ZNF623	9831	ENSG00000183309	protein_coding	63	rs58579887	0		0	1	0	0		0	-	E	-	-	-
CDKN2B-AS1	100048912	ENSG00000240498	lncRNA	64	rs1333047	1		1	1	0	1		1	eQTL (rs1333047, PP=0.520)	E+ (UQ)	-	-	-
RP11-145E5.5	-	ENSG00000264545	protein_coding	64	rs1333047	0		1	0	1	0		0	-	E	M7	-	-
CDKN2A	1029	ENSG00000147889	protein_coding	64	rs1333047	0		1	1	0	0		0	-	E	M7	integument; endocrine/exocrine gland; cellular; homeostasis/metabolism; renal/urinary system; skeleton; behavior/neurological; respiratory system; mortality/aging; reproductive system; hematopoietic system; neoplasm; nervous system; digestive/alimentary; vision/eye; immune system;	{Melanoma and neural system tumor syndrome}, 155755 (3), Autosomal dominant; {Melanoma, cutaneous malignant, 2}, 155601 (3), Autosomal dominant; {Melanoma-pancreatic cancer syndrome}, 606719 (3), Autosomal dominant
CDKN2B	1030	ENSG00000147883	protein_coding	64	rs1333047	0		1	1	0	0		0	-	E (UQ)	-	immune system; neoplasm; hematopoietic system; mortality/aging; cellular;	-
RP11-149I2.4	-	ENSG00000266446	lncRNA	64	rs1333047	0		1	0	0	0		0	-	NE	-	-	-
ASPN	54829	ENSG00000106819	protein_coding	65	rs755209	1		1	1	1	1		1	-	E	M1	hearing/vestibular/ear; vision/eye;	{Osteoarthritis susceptibility 3}, 607850 (3), Autosomal dominant; {Lumbar disc degeneration}, 603932 (3)
CENPP	401541	ENSG00000188312	protein_coding	65	rs755209	0		1	1	1	1		0	-	E	M7	-	-
ECM2	1842	ENSG00000106823	protein_coding	65	rs755209	0		1	1	1	1		0	-	E	M1	-	-
BICD2	23299	ENSG00000185963	protein_coding	65	rs755209	1		1	1	0	1		1	-	E (UQ)	-	mortality/aging; behavior/neurological; skeleton; nervous system; growth/size/body region; cellular; craniofacial;	Spinal muscular atrophy, lower extremity-predominant, 2B, autosomal dominant, 618291 (3), Autosomal dominant; Spinal muscular atrophy, lower extremity-predominant, 2A, autosomal dominant, 615290 (3), Autosomal dominant
IARS	3376	ENSG00000196305	protein_coding	65	rs755209	0		1	1	0	1		0	-	E (UQ)	-	-	-
IPPK	64768	ENSG00000127080	protein_coding	65	rs755209	0		1	1	0	1		0	-	E (UQ)	M7	mortality/aging; cardiovascular system;	-
NOL8	55035	ENSG00000198000	protein_coding	65	rs755209	0		1	1	0	1		0	-	E (UQ)	-	mortality/aging; behavior/neurological; growth/size/body region; homeostasis/metabolism;	-
OGN	4969	ENSG00000106809	protein_coding	65	rs755209	1		1	1	0	1		1	-	E (UQ)	M1	homeostasis/metabolism; integument; hematopoietic system; vision/eye; immune system;	-
OMD	4958	ENSG00000127083	protein_coding	65	rs755209	1		1	1	0	1		1	-	E	M1	skeleton; behavior/neurological;	-
MIR4670	100616351	ENSG00000264158	miRNA	65	rs755209	0		1	0	0	0		0	-	NE	-	-	-
RP11-62C3.6	-	ENSG00000236115	lncRNA	65	rs755209	0		1	0	0	0		0	-	NE	-	-	-
SNORA84	100124534	ENSG00000239183	snoRNA	65	rs755209	0		1	0	0	0		0	-	E	-	-	-
FGD3	89846	ENSG00000127084	protein_coding	65	rs755209	0		0	1	0	0		0	-	E	-	-	-
LINC00475	158314	ENSG00000225511	transcribed_unprocessed_pseudogene	65	rs755209	0		0	1	0	0		0	-	E	-	-	-
ROR2	4920	ENSG00000169071	protein_coding	65	rs755209	0		0	1	0	0		0	-	E	M1	adipose tissue; endocrine/exocrine gland; growth/size/body region; craniofacial; cellular; homeostasis/metabolism; respiratory system; embryo; mortality/aging; reproductive system; cardiovascular system; vision/eye; hearing/vestibular/ear; nervous system; limbs/digits/tail; digestive/alimentary; skeleton;	Brachydactyly, type B1, 113000 (3), Autosomal dominant; Robinow syndrome, autosomal recessive, 268310 (3), Autosomal recessive
SFT2D1	113402	ENSG00000198818	protein_coding	65	rs755209	0		0	1	0	0		0	-	E (UQ)	-	-	-
SPTLC1	10558	ENSG00000090054	protein_coding	65	rs755209	0		0	1	0	0		0	-	E (UQ)	-	mortality/aging; homeostasis/metabolism;	Neuropathy, hereditary sensory and autonomic, type IA, 162400 (3), Autosomal dominant
ZNF484	83744	ENSG00000127081	protein_coding	65	rs755209	0		0	1	0	0		0	-	E	-	-	-
PAPPA	5069	ENSG00000182752	protein_coding	66	rs1858015	0		1	0	1	1		0	-	E	M1	growth/size/body region; homeostasis/metabolism; cardiovascular system; skeleton;	-
ASTN2	23245	ENSG00000148219	protein_coding	66	rs1858015	0		1	0	0	0		0	-	E	-	-	-
PAPPA-AS1	493913	ENSG00000256040	lncRNA	66	rs1858015	0		1	0	0	0		0	-	NE	-	-	-
PAPPA-AS2	103611155	ENSG00000226604	lncRNA	66	rs1858015	0		0	1	0	0		0	-	NE	-	-	-
MED22	6837	ENSG00000148297	protein_coding	67	rs676996	0		1	1	1	0		0	-	E	M1	behavior/neurological; hematopoietic system; mortality/aging; skeleton; growth/size/body region;	-
OBP2B	29989	ENSG00000171102	protein_coding	67	rs676996	0		1	1	1	0		0	-	NE	-	integument; pigmentation;	-
ABO	28	ENSG00000175164	protein_coding	67	rs676996	0		1	1	0	1		0	-	E (UQ)	M4	-	[Blood group, ABO system], 616093 (3)
ADAMTS13	11093	ENSG00000160323	protein_coding	67	rs676996	0		1	1	0	0		0	-	E	-	homeostasis/metabolism; mortality/aging; hematopoietic system; immune system;	Thrombotic thrombocytopenic purpura, hereditary, 274150 (3), Autosomal recessive
CACFD1	11094	ENSG00000160325	protein_coding	67	rs676996	1		1	1	0	0		0	-	E (UQ)	M4_hub	homeostasis/metabolism; cellular; behavior/neurological; neoplasm;	-
REXO4	57109	ENSG00000148300	protein_coding	67	rs676996	0		1	1	0	0		0	-	E	-	-	-
SLC2A6	11182	ENSG00000160326	protein_coding	67	rs676996	0		1	1	0	0		0	-	E	M1	homeostasis/metabolism; adipose tissue;	-
SURF1	6834	ENSG00000148290	protein_coding	67	rs676996	0		1	1	0	0		0	-	E (UQ)	-	homeostasis/metabolism; cellular; growth/size/body region; nervous system; limbs/digits/tail; embryo; behavior/neurological; reproductive system; mortality/aging;	Leigh syndrome, due to COX IV deficiency, 256000 (3), Autosomal recessive, Mitochondrial; Charcot-Marie-Tooth disease, type 4K, 616684 (3), Autosomal recessive
SURF2	6835	ENSG00000148291	protein_coding	67	rs676996	0		1	1	0	0		0	-	E (UQ)	M7	-	-
SURF6	6838	ENSG00000148296	protein_coding	67	rs676996	0		1	1	0	0		0	-	E (UQ)	M4	-	-
C9orf96	169436	ENSG00000198870	protein_coding	67	rs676996	0		1	0	0	0		0	-	E	-	-	-
RPL7A	6130	ENSG00000148303	protein_coding	67	rs676996	0		1	0	0	0		0	-	E (UQ)	-	-	-
SNORD24	26820	ENSG00000206611	snoRNA	67	rs676996	0		1	0	0	0		0	-	E (UQ)	-	-	-
SNORD36A	26815	ENSG00000199744	snoRNA	67	rs676996	0		1	0	0	0		0	-	E	-	-	-
SNORD36B	26814	ENSG00000200831	snoRNA	67	rs676996	1		1	0	0	0		0	-	E-	-	-	-
SNORD36C	26813	ENSG00000252542	snoRNA	67	rs676996	1		1	0	0	0		0	-	E- (UQ)	-	-	-
SURF4	6836	ENSG00000148248	protein_coding	67	rs676996	0		1	0	0	0		0	-	E (UQ)	M4	mortality/aging;	-
ADAMTSL2	9719	ENSG00000197859	protein_coding	67	rs676996	0		0	1	0	0		0	-	E	-	respiratory system; mortality/aging; limbs/digits/tail; skeleton; muscle; homeostasis/metabolism;	Geleophysic dysplasia 1, 231050 (3), Autosomal recessive
DBH	1621	ENSG00000123454	protein_coding	67	rs676996	0		0	1	0	0		0	-	E	-	behavior/neurological; cardiovascular system; mortality/aging; nervous system; vision/eye; growth/size/body region; endocrine/exocrine gland; homeostasis/metabolism;	Orthostatic hypotension 1, due to DBH deficiency, 223360 (3), Autosomal recessive
DBH-AS1	138948	ENSG00000225756	lncRNA	67	rs676996	0		0	1	0	0		0	-	E	M1	-	-
GBGT1	26301	ENSG00000148288	protein_coding	67	rs676996	0		0	1	0	0		0	-	E	-	endocrine/exocrine gland; behavior/neurological; reproductive system;	-
LL09NC01-139C3.1	-	ENSG00000273473	lncRNA	67	rs676996	0		0	1	0	0		0	-	E	-	-	-
RALGDS	5900	ENSG00000160271	protein_coding	67	rs676996	0		0	1	0	0		0	-	E (UQ)	M7	neoplasm; homeostasis/metabolism;	-
SARDH	1757	ENSG00000123453	protein_coding	67	rs676996	0		0	1	0	0		0	-	E	-	-	[Sarcosinemia], 268900 (3), Autosomal recessive
KIAA1217	56243	ENSG00000120549	protein_coding	68	rs6482359	1		1	1	0	1		0	eQTL (rs6482359, PP=0.797)	E (UQ)	M4	skeleton; limbs/digits/tail; embryo;	-
MSRB2	22921	ENSG00000148450	protein_coding	68	rs6482359	0		0	1	0	0		0	-	E (UQ)	-	-	-
CTBP2	1488	ENSG00000175029	protein_coding	69	rs3012065	1		1	1	1	1		1	-	E (UQ)	-	growth/size/body region; embryo; nervous system; cardiovascular system; mortality/aging;	-
RP11-298J20.4	-	ENSG00000249456	lncRNA	69	rs3012065	0		0	1	0	0		0	-	E	-	-	-
ZRANB1	54764	ENSG00000019995	protein_coding	69	rs3012065	0		0	1	0	0		0	-	E (UQ)	M1	homeostasis/metabolism; mortality/aging; hematopoietic system; immune system;	-
RP11-179A10.1	-	ENSG00000254401	lncRNA	70	rs2218793	0		0	1	0	0		0	-	E	-	-	-
AMPD3	272	ENSG00000133805	protein_coding	70:71	rs2218793:rs4910165	0		1	0	1	1		0	-	E (UQ)	M4	homeostasis/metabolism; respiratory system; behavior/neurological; immune system; hematopoietic system;	[AMP deaminase deficiency, erythrocytic], 612874 (3), Autosomal recessive
MRVI1-AS1	100129827	ENSG00000177112	lncRNA	70:71	rs2218793:rs4910165	0		0	1	0	0		0	-	E	-	-	-
RNF141	50862	ENSG00000110315	protein_coding	70:71	rs2218793:rs4910165	0		0	1	0	0		0	-	E (UQ)	M7	reproductive system;	-
RP11-748C4.1	-	ENSG00000254865	lncRNA	70:71	rs2218793:rs4910165	0		0	1	0	0		0	-	NE	-	-	-
MRVI1	10335	ENSG00000072952	protein_coding	70:71	rs2218793:rs4910165	1		1	1	1	1		1	-	E (UQ)	M1_hub	-	-
RP11-685M7.3	101928053	ENSG00000246308	lncRNA	71	rs4910165	0		0	1	0	0		0	-	E	-	-	-
FNBP4	23360	ENSG00000109920	protein_coding	72	rs10838738	0		1	1	1	1		0	-	E (UQ)	-	-	-
MTCH2	23788	ENSG00000109919	protein_coding	72	rs10838738	0		1	1	1	1		0	-	E (UQ)	M4	skeleton; embryo; liver/biliary system; mortality/aging; growth/size/body region;	-
NDUFS3	4722	ENSG00000213619	protein_coding	72	rs10838738	0		1	1	1	1		0	-	E (UQ)	-	hematopoietic system; cardiovascular system; behavior/neurological; homeostasis/metabolism; growth/size/body region;	Mitochondrial complex I deficiency, nuclear type 8, 618230 (3), Autosomal recessive
NUP160	23279	ENSG00000030066	protein_coding	72	rs10838738	0		1	1	1	1		0	-	E (UQ)	-	-	?Nephrotic syndrome, type 19, 618178 (3), Autosomal recessive
PSMC3	5702	ENSG00000165916	protein_coding	72	rs10838738	0		1	1	1	1		0	-	E (UQ)	-	embryo; mortality/aging; reproductive system;	-
SLC39A13	91252	ENSG00000165915	protein_coding	72	rs10838738	0		1	1	1	1		0	-	E	M1	cellular; craniofacial; integument; growth/size/body region; skeleton; vision/eye;	Ehlers-Danlos syndrome, spondylodysplastic type, 3, 612350 (3), Autosomal recessive
AGBL2	79841	ENSG00000165923	protein_coding	72	rs10838738	0		1	0	1	1		0	-	E	-	-	-
CELF1	10658	ENSG00000149187	protein_coding	72	rs10838738	0		1	0	1	1		0	-	E (UQ)	M1	endocrine/exocrine gland; growth/size/body region; embryo; reproductive system; mortality/aging;	-
SPI1	6688	ENSG00000066336	protein_coding	72	rs10838738	0		1	0	1	1		0	-	E	-	growth/size/body region; endocrine/exocrine gland; cellular; vision/eye; craniofacial; mortality/aging; cardiovascular system; hematopoietic system; neoplasm; liver/biliary system; immune system; skeleton; nervous system;	-
C1QTNF4	114900	ENSG00000172247	protein_coding	72	rs10838738	0		1	1	0	1		0	-	E	M1	-	-
KBTBD4	55709	ENSG00000123444	protein_coding	72	rs10838738	0		1	1	0	1		0	-	E (UQ)	-	-	-
MYBPC3	4607	ENSG00000134571	protein_coding	72	rs10838738	0		1	1	0	1		0	-	E	-	homeostasis/metabolism; cellular; muscle; cardiovascular system; mortality/aging; behavior/neurological;	Cardiomyopathy, hypertrophic, 4, 115197 (3), Autosomal dominant, Autosomal recessive; Cardiomyopathy, dilated, 1MM, 615396 (3), Autosomal dominant; Left ventricular noncompaction 10, 615396 (3), Autosomal dominant
PTPMT1	114971	ENSG00000110536	protein_coding	72	rs10838738	0		1	1	0	1		0	-	E (UQ)	-	immune system; embryo; mortality/aging; growth/size/body region; hematopoietic system; cellular; endocrine/exocrine gland;	-
RAPSN	5913	ENSG00000165917	protein_coding	72	rs10838738	1		1	1	0	1		1	-	E	-	muscle; immune system; homeostasis/metabolism; respiratory system; mortality/aging; hematopoietic system; nervous system;	Fetal akinesia deformation sequence 2, 618388 (3), Autosomal recessive; Myasthenic syndrome, congenital, 11, associated with acetylcholine receptor deficiency, 616326 (3), Autosomal recessive
FAM180B	399888	ENSG00000196666	protein_coding	72	rs10838738	0		1	1	0	0		0	-	E	-	-	-
RP11-750H9.5	-	ENSG00000255197	lncRNA	72	rs10838738	0		1	1	0	0		0	-	NE	-	-	-
KBTBD4	55709	ENSG00000231880	lncRNA	72	rs10838738	0		1	0	0	0		0	-	NE	-	-	-
MIR4487	100616222	ENSG00000264583	miRNA	72	rs10838738	0		1	0	0	0		0	-	NE	-	-	-
RNA5SP340	100873603	ENSG00000252941	rRNA_pseudogene	72	rs10838738	0		1	0	0	0		0	-	NE	-	-	-
RNU5E-10P	100873888	ENSG00000200376	snRNA	72	rs10838738	0		1	0	0	0		0	-	NE	-	-	-
RP11-750H9.7	-	ENSG00000270072	lncRNA	72	rs10838738	0		1	0	0	0		0	-	E	-	-	-
MADD	8567	ENSG00000110514	protein_coding	72	rs10838738	0		0	1	0	1		0	-	E (UQ)	M4	homeostasis/metabolism; endocrine/exocrine gland; integument; mortality/aging; nervous system; behavior/neurological; respiratory system;	-
ACP2	53	ENSG00000134575	polymorphic_pseudogene	72	rs10838738	0		0	1	0	0		0	-	E (UQ)	M4	integument; growth/size/body region; cellular; hematopoietic system; behavior/neurological; immune system; skeleton; renal/urinary system; nervous system;	?Lysosomal acid phosphatase deficiency, 200950 (1), Autosomal recessive
C11orf49	79096	ENSG00000149179	protein_coding	72	rs10838738	0		0	1	0	0		0	-	E (UQ)	-	-	-
DDB2	1643	ENSG00000134574	protein_coding	72	rs10838738	0		0	1	0	0		0	-	E (UQ)	M7	neoplasm; mortality/aging; growth/size/body region; cellular; integument;	Xeroderma pigmentosum, group E, DDB-negative subtype, 278740 (3), Autosomal recessive
LRP4	4038	ENSG00000134569	protein_coding	72	rs10838738	0		0	1	0	0		0	-	E	M4	embryo; behavior/neurological; respiratory system; mortality/aging; reproductive system; nervous system; limbs/digits/tail; skeleton; renal/urinary system; integument; growth/size/body region; endocrine/exocrine gland; craniofacial; homeostasis/metabolism;	?Myasthenic syndrome, congenital, 17, 616304 (3), Autosomal recessive; Sclerosteosis 2, 614305 (3), Autosomal dominant, Autosomal recessive; Cenani-Lenz syndactyly syndrome, 212780 (3), Autosomal recessive
LRP4-AS1	100507401	ENSG00000247675	lncRNA	72	rs10838738	0		0	1	0	0		0	-	E	-	-	-
NR1H3	10062	ENSG00000025434	protein_coding	72	rs10838738	0		0	1	0	0		0	-	E	-	liver/biliary system; mortality/aging; reproductive system; hematopoietic system; cardiovascular system; renal/urinary system; cellular; immune system; homeostasis/metabolism; endocrine/exocrine gland;	-
PACSIN3	29763	ENSG00000165912	protein_coding	72	rs10838738	0		0	1	0	0		0	-	E	M7	hematopoietic system;	-
PTPRJ	5795	ENSG00000149177	protein_coding	72	rs10838738	0		0	1	0	0		0	-	E (UQ)	-	homeostasis/metabolism; muscle; growth/size/body region; embryo; immune system; neoplasm; cardiovascular system; hematopoietic system; mortality/aging; reproductive system;	Colon cancer, somatic, 114500 (3)
ANO1	55107	ENSG00000131620	protein_coding	73	rs2186797	1		1	1	0	1		1	coding variant & eQTL (rs2186797, PP=0.970)	E (UQ)	-	homeostasis/metabolism; muscle; growth/size/body region; integument; renal/urinary system; skeleton; digestive/alimentary; nervous system; cardiovascular system; mortality/aging; behavior/neurological; respiratory system;	-
FADD	8772	ENSG00000168040	protein_coding	73	rs2186797	1		0	1	0	0		0	eQTL (rs2186797, PP=0.970)	E (UQ)	-	mortality/aging; reproductive system; hematopoietic system; cardiovascular system; embryo; immune system; skeleton; nervous system; digestive/alimentary; growth/size/body region; endocrine/exocrine gland; cellular; muscle;	Infections, recurrent, with encephalopathy, hepatic dysfunction, and cardiovascular malformations, 613759 (3), Autosomal recessive
ANO1-AS1	100873981	ENSG00000254902	lncRNA	73	rs2186797	0		1	0	0	0		0	-	NE	-	-	-
RP11-805J14.3	-	ENSG00000255143	lncRNA	73	rs2186797	0		1	0	0	0		0	-	NE	-	-	-
RP11-805J14.5	-	ENSG00000254721	lncRNA	73	rs2186797	1		0	1	0	0		0	eQTL (rs2186797, PP=0.970)	NE	-	-	-
NCAM1	4684	ENSG00000149294	protein_coding	74	rs2212450	0		1	1	1	1		0	-	E	M1	mortality/aging; behavior/neurological; vision/eye; nervous system; cellular;	-
RP11-629G13.1	101928847	ENSG00000247416	lncRNA	74	rs2212450	0		1	1	0	1		0	-	E	-	-	-
RNU7-187P	106479095	ENSG00000238998	snRNA	74	rs2212450	0		1	0	0	0		0	-	NE	-	-	-
NCAM1-AS1	100288346	ENSG00000227487	lncRNA	74	rs2212450	0		0	1	0	0		0	-	NE	-	-	-
RP11-839D17.3	-	ENSG00000255129	lncRNA	74	rs2212450	0		0	1	0	0		0	-	E	M1	-	-
TIMM8B	26521	ENSG00000150779	protein_coding	74	rs2212450	0		0	1	0	0		0	-	E (UQ)	-	-	-
CLMP	79827	ENSG00000166250	protein_coding	75	rs4345978	1		1	1	1	1		1	-	E (UQ)	M1	digestive/alimentary; renal/urinary system; behavior/neurological; reproductive system; mortality/aging; cardiovascular system; growth/size/body region; muscle; homeostasis/metabolism;	Congenital short bowel syndrome, 615237 (3), Autosomal recessive
SNORD14E	85391	ENSG00000200879	snoRNA	75	rs4345978	0		0	1	0	0		0	-	E	-	-	-
VWA5A	4013	ENSG00000110002	protein_coding	75	rs4345978	0		0	1	0	0		0	-	E (UQ)	-	integument; behavior/neurological; vision/eye;	-
CTC-465D4.1	-	ENSG00000256499	lncRNA	76	rs11045079	0		1	0	0	0		0	-	NE	-	-	-
PDE3A	5139	ENSG00000172572	protein_coding	76	rs11045079	0		0	0	0	1		0	-	E	-	reproductive system;	Hypertension and brachydactyly syndrome, 112410 (3), Autosomal dominant
LINC00477	144360	ENSG00000197503	lncRNA	77:78	rs4579999:rs111235435	0		1	1	0	1		0	-	E	-	-	-
LYRM5	144363	ENSG00000205707	protein_coding	78	rs111235435	0		0	1	0	0		0	-	E	M1	-	-
HDAC7	51564	ENSG00000061273	protein_coding	79	rs13632	0		1	1	1	1		0	-	E (UQ)	-	craniofacial; muscle; homeostasis/metabolism; mortality/aging; cardiovascular system; embryo;	-
SLC48A1	55652	ENSG00000211584	protein_coding	79	rs13632	0		1	1	1	1		0	-	E (UQ)	-	-	-
RAPGEF3	10411	ENSG00000079337	protein_coding	79	rs13632	0		1	1	0	1		0	-	E (UQ)	-	endocrine/exocrine gland; adipose tissue; growth/size/body region; homeostasis/metabolism; cellular; behavior/neurological; nervous system; immune system;	-
AC004466.1	-	ENSG00000268069	lncRNA	79	rs13632	0		1	1	0	0		0	-	E	-	-	-
RP1-197B17.3	105369748	ENSG00000257433	lncRNA	79	rs13632	0		0	1	0	1		0	-	E	-	-	-
ENDOU	8909	ENSG00000111405	protein_coding	79	rs13632	0		0	0	0	1		0	-	E (UQ)	M7	renal/urinary system; growth/size/body region; adipose tissue;	-
RPAP3	79657	ENSG00000005175	protein_coding	79	rs13632	0		0	0	0	1		0	-	E (UQ)	-	mortality/aging;	-
PCED1B-AS1	100233209	ENSG00000247774	lncRNA	79	rs13632	0		0	1	0	0		0	-	E	-	-	-
HOTAIR	100124700	ENSG00000228630	lncRNA	80	rs920778	0		1	1	0	1		0	-	E	M1	limbs/digits/tail; skeleton;	-
HOXC11	3227	ENSG00000123388	protein_coding	80	rs920778	1		1	0	0	1		1	-	E	-	-	-
HOXC-AS3	100874365	ENSG00000251151	lncRNA	80	rs920778	0		1	0	0	0		0	-	E	-	-	-
HOXC10	3226	ENSG00000180818	protein_coding	80	rs920778	0		1	0	0	0		0	-	E	M1	growth/size/body region; muscle; behavior/neurological; renal/urinary system; skeleton; nervous system; limbs/digits/tail;	-
HOXC12	3228	ENSG00000123407	protein_coding	80	rs920778	0		1	0	0	0		0	-	E	-	limbs/digits/tail;	-
HOXC6	3223	ENSG00000197757	protein_coding	80	rs920778	0		1	0	0	0		0	-	E	-	endocrine/exocrine gland; integument; skeleton;	-
MIR196A2	406973	ENSG00000207924	miRNA	80	rs920778	0		1	0	0	0		0	-	NE	-	skeleton;	-
RP11-834C11.12	-	ENSG00000273049	protein_coding	80	rs920778	0		1	0	0	0		0	-	NE	-	-	-
CBX5	23468	ENSG00000094916	protein_coding	80	rs920778	0		0	1	0	0		0	-	E (UQ)	M1	growth/size/body region; mortality/aging; hematopoietic system; behavior/neurological; skeleton; immune system;	-
HOXC4	3221	ENSG00000198353	protein_coding	80	rs920778	0		0	1	0	0		0	-	E	-	muscle; hematopoietic system; mortality/aging; behavior/neurological; immune system; skeleton; digestive/alimentary;	-
RP11-834C11.11	-	ENSG00000260470	lncRNA	80	rs920778	0		0	1	0	0		0	-	E	-	-	-
RP11-834C11.6	-	ENSG00000249388	lncRNA	80	rs920778	0		0	1	0	0		0	-	NE	-	-	-
HMGA2	8091	ENSG00000149948	protein_coding	81	rs11176001	1		1	1	1	1		1	-	E	-	cellular; homeostasis/metabolism; craniofacial; adipose tissue; endocrine/exocrine gland; integument; growth/size/body region; nervous system; hearing/vestibular/ear; limbs/digits/tail; reproductive system; behavior/neurological;	Leiomyoma, uterine, somatic, 150699 (1)
RP11-366L20.3	-	ENSG00000256083	lncRNA	81	rs11176001	0		1	0	0	0		0	-	NE	-	-	-
RP11-366L20.4	105369810	ENSG00000256259	lncRNA	81	rs11176001	0		1	0	0	0		0	-	NE	-	-	-
HELB	92797	ENSG00000127311	protein_coding	81	rs11176001	0		0	1	0	0		0	-	E	-	cellular; homeostasis/metabolism;	-
RP11-139B1.1	105369996	ENSG00000257476	lncRNA	82	rs2555004	0		1	0	0	0		0	-	NE	-	-	-
TBX5	6910	ENSG00000089225	protein_coding	82	rs2555004	0		0	1	0	1		0	-	E	M1	growth/size/body region; muscle; homeostasis/metabolism; skeleton; embryo; cardiovascular system; mortality/aging; limbs/digits/tail;	Holt-Oram syndrome, 142900 (3), Autosomal dominant
DLEU1	10301	ENSG00000176124	lncRNA	83	rs7994724	0		1	0	1	1		0	-	E	-	-	-
DLEU7	220107	ENSG00000186047	protein_coding	83	rs7994724	0		1	1	1	0		0	-	E	-	cardiovascular system; behavior/neurological;	-
RNASEH2B	79621	ENSG00000136104	protein_coding	83	rs7994724	1		1	1	1	0		0	eQTL (rs7994724, PP=0.621)	E (UQ)	-	immune system; embryo; liver/biliary system; hematopoietic system; cardiovascular system; mortality/aging; endocrine/exocrine gland; homeostasis/metabolism; cellular; growth/size/body region;	Aicardi-Goutieres syndrome 2, 610181 (3), Autosomal recessive
RNASEH2B-AS1	100874255	ENSG00000233672	lncRNA	83	rs7994724	1		1	1	0	0		0	eQTL (rs7994724, PP=0.621)	E	-	-	-
RNA5SP28	100873360	ENSG00000200711	rRNA_pseudogene	83	rs7994724	0		1	0	0	0		0	-	NE	-	-	-
INTS6-AS1	100507398	ENSG00000236778	lncRNA	83	rs7994724	0		0	1	0	0		0	-	E	-	-	-
ARHGAP11A	9824	ENSG00000198826	protein_coding	84	rs11635984	1		0	1	0	0		0	eQTL (rs11635984, PP=0.619)	E	-	-	-
GREM1	26585	ENSG00000166923	protein_coding	84	rs11635984	0		1	1	1	1		0	-	E (UQ)	M1	mortality/aging; embryo; respiratory system; renal/urinary system; skeleton; limbs/digits/tail; homeostasis/metabolism; cellular;	-
SCG5	6447	ENSG00000166922	protein_coding	84	rs11635984	0		1	0	1	1		0	-	E	-	respiratory system; liver/biliary system; behavior/neurological; reproductive system; mortality/aging; cardiovascular system; hematopoietic system; nervous system; immune system; integument; growth/size/body region; endocrine/exocrine gland; adipose tissue; cellular; homeostasis/metabolism;	-
RP11-758N13.1	100131315	ENSG00000259721	lncRNA	84	rs11635984	1		1	1	0	0		0	eQTL (rs11635984, PP=0.619)	E	M1	-	-
SMAD3	4088	ENSG00000166949	protein_coding	85:86	rs17293632:rs12594232	1		1	1	1	1		1	-	E (UQ)	M7	growth/size/body region; integument; endocrine/exocrine gland; homeostasis/metabolism; cellular; cardiovascular system; hematopoietic system; mortality/aging; reproductive system; neoplasm; behavior/neurological; immune system; renal/urinary system; skeleton; digestive/alimentary; limbs/digits/tail;	Loeys-Dietz syndrome 3, 613795 (3), Autosomal dominant
RP11-342M21.2	-	ENSG00000259202	lncRNA	85:86	rs17293632:rs12594232	0		1	0	1	0		0	-	NE	-	-	-
AAGAB	79719	ENSG00000103591	protein_coding	85:86	rs17293632:rs12594232	0		0	1	0	0		0	-	E (UQ)	M4	-	Keratoderma, palmoplantar, punctate type IA, 148600 (3), Autosomal dominant
CTD-3185P2.1	-	ENSG00000261351	lncRNA	85:86	rs17293632:rs12594232	0		0	1	0	0		0	-	E	-	-	-
IQCH	64799	ENSG00000103599	protein_coding	85:86	rs17293632:rs12594232	0		0	1	0	0		0	-	E	M4	-	-
MAP2K5	5607	ENSG00000137764	protein_coding	85:86	rs17293632:rs12594232	0		0	1	0	0		0	-	E	-	embryo; cardiovascular system; mortality/aging; growth/size/body region; muscle; cellular;	-
RP11-502I4.3	-	ENSG00000270964	lncRNA	85:86	rs17293632:rs12594232	0		0	1	0	0		0	-	E	-	-	-
SKOR1	390598	ENSG00000188779	protein_coding	85:86	rs17293632:rs12594232	0		0	1	0	0		0	-	E	M4	-	-
PIAS1	8554	ENSG00000033800	protein_coding	85:86	rs17293632:rs12594232	0		1	1	1	1		0	-	E (UQ)	-	growth/size/body region; mortality/aging; immune system;	-
CALML4	91860	ENSG00000129007	protein_coding	86	rs12594232	1		1	1	1	1		0	-	E+ (UQ)	-	-	-
CLN6	54982	ENSG00000128973	protein_coding	86	rs12594232	0		1	1	1	1		0	-	E (UQ)	-	hematopoietic system; mortality/aging; behavior/neurological; nervous system; vision/eye; adipose tissue;	Ceroid lipofuscinosis, neuronal, Kufs type, adult onset, 204300 (3), Autosomal recessive; Ceroid lipofuscinosis, neuronal, 6, 601780 (3), Autosomal recessive
RP11-315D16.2	-	ENSG00000260007	protein_coding	86	rs12594232	0		1	1	1	0		0	-	E	-	-	-
RP11-315D16.4	-	ENSG00000260657	lncRNA	86	rs12594232	0		0	1	0	0		0	-	NE	-	-	-
LINC00924	145820	ENSG00000259134	lncRNA	87	rs7183672	0		0	0	0	1		0	-	E	M1	-	-
MYH11	4629	ENSG00000133392	protein_coding	88	rs6498573	1		1	1	1	1		1	eQTL (rs6498573, PP=0.632)	E+ (UQ)	M1_hub	growth/size/body region; integument; homeostasis/metabolism; cellular; muscle; digestive/alimentary; cardiovascular system; mortality/aging; respiratory system; renal/urinary system;	Aortic aneurysm, familial thoracic 4, 132900 (3), Autosomal dominant
NDE1	54820	ENSG00000072864	protein_coding	88	rs6498573	1		0	1	0	1		0	eQTL (rs6498573, PP=0.632)	E	-	cellular; nervous system;	Lissencephaly 4 (with microcephaly), 614019 (3), Autosomal recessive; ?Microhydranencephaly, 605013 (3), Autosomal recessive
NTAN1	123803	ENSG00000157045	protein_coding	88	rs6498573	1		0	1	0	0		0	eQTL (rs6498573, PP=0.632)	E (UQ)	M1	cellular; behavior/neurological; hematopoietic system; mortality/aging; immune system;	-
AF001548.5	-	ENSG00000263335	lncRNA	88	rs6498573	1		0	1	0	0		0	eQTL (rs6498573, PP=0.632)	E	-	-	-
AF001548.6	-	ENSG00000263065	lncRNA	88	rs6498573	1		0	1	0	0		0	eQTL (rs6498573, PP=0.632)	NE	-	-	-
RP11-1186N24.5	105369154	ENSG00000270580	lncRNA	88	rs6498573	0		0	1	0	0		0	-	E	-	-	-
RP11-72I8.1	100505915	ENSG00000260735	transcribed_processed_pseudogene	88	rs6498573	0		0	1	0	0		0	-	E	-	-	-
FOXL1	2300	ENSG00000176678	protein_coding	89	rs4843407	1		1	0	0	1		1	-	E	-	cellular; growth/size/body region; endocrine/exocrine gland; digestive/alimentary; mortality/aging;	-
MTHFSD	64779	ENSG00000103248	protein_coding	89	rs4843407	0		0	1	0	0		0	-	E	-	-	-
RP11-463O9.9	-	ENSG00000270020	lncRNA	89	rs4843407	0		0	1	0	0		0	-	E	-	-	-
POLR2A	5430	ENSG00000181222	protein_coding	90	rs78378222	0		1	0	0	0		0	-	E (UQ)	M7	mortality/aging; growth/size/body region;	Neurodevelopmental disorder with hypotonia and variable intellectual and behavioral abnormalities, 618603 (3), Autosomal dominant
SENP3	26168	ENSG00000161956	protein_coding	90	rs78378222	0		1	0	0	0		0	-	E (UQ)	M7	behavior/neurological; homeostasis/metabolism;	-
TNFSF12	8742	ENSG00000239697	protein_coding	90	rs78378222	0		1	0	0	0		0	-	E	M1	cellular; liver/biliary system; immune system; hematopoietic system;	-
TNFSF12-TNFSF13	407977	ENSG00000248871	protein_coding	90	rs78378222	0		1	0	0	0		0	-	E	M4	-	-
TNFSF13	8741	ENSG00000161955	protein_coding	90	rs78378222	0		1	0	0	0		0	-	E (UQ)	M4	hematopoietic system; skeleton; immune system; cellular;	-
TP53	7157	ENSG00000141510	protein_coding	90	rs78378222	0		1	0	0	0		0	-	E (UQ)	-	behavior/neurological; liver/biliary system; respiratory system; embryo; neoplasm; pigmentation; mortality/aging; reproductive system; hematopoietic system; cardiovascular system; vision/eye; limbs/digits/tail; hearing/vestibular/ear; nervous system; digestive/alimentary; renal/urinary system; skeleton; cellular; immune system; homeostasis/metabolism; adipose tissue; endocrine/exocrine gland; int…	{Adrenocortical carcinoma, pediatric}, 202300 (3), Autosomal dominant; {Glioma susceptibility 1}, 137800 (3), Autosomal dominant, Somatic mutation; {Basal cell carcinoma 7}, 614740 (3), Autosomal dominant; Bone marrow failure syndrome 5, 618165 (3), Autosomal dominant; {Colorectal cancer}, 114500 (3), Autosomal dominant, Somatic mutation; Nasopharyngeal carcinoma, somatic, 607107 (3); Breast canc…
AC027763.2	100506713	ENSG00000215067	lncRNA	90	rs78378222	0		0	1	0	0		0	-	E	-	-	-
MYOCD	93649	ENSG00000141052	protein_coding	91	rs62061554	1		0	0	0	1		1	-	E	M1	muscle; homeostasis/metabolism; cellular; growth/size/body region; embryo; cardiovascular system; mortality/aging;	Megabladder, congenital, 618719 (3), Autosomal dominant
ATPAF2	91647	ENSG00000171953	protein_coding	92	rs854786	0		1	1	1	1		0	-	E	M4	mortality/aging; skeleton; growth/size/body region; craniofacial;	?Mitochondrial complex V (ATP synthase) deficiency, nuclear type 1, 604273 (3), Autosomal recessive
DRG2	1819	ENSG00000108591	protein_coding	92	rs854786	0		1	1	1	1		0	-	E (UQ)	-	behavior/neurological; skeleton; limbs/digits/tail; growth/size/body region; homeostasis/metabolism;	-
GID4	79018	ENSG00000141034	protein_coding	92	rs854786	0		1	1	1	1		0	-	E	-	-	-
LRRC48	83450	ENSG00000171962	protein_coding	92	rs854786	0		1	1	1	1		0	-	E	-	-	-
MYO15A	51168	ENSG00000091536	protein_coding	92	rs854786	0		1	1	1	1		0	-	E	-	vision/eye; hearing/vestibular/ear; nervous system; behavior/neurological; hematopoietic system; adipose tissue;	Deafness, autosomal recessive 3, 600316 (3), Autosomal recessive
TOM1L2	146691	ENSG00000175662	protein_coding	92	rs854786	0		1	1	1	1		0	-	E (UQ)	M7	vision/eye; nervous system; renal/urinary system; skeleton; immune system; respiratory system; behavior/neurological; neoplasm; reproductive system; integument; hematopoietic system; cardiovascular system; growth/size/body region; craniofacial; endocrine/exocrine gland; adipose tissue;	-
ALKBH5	54890	ENSG00000091542	protein_coding	92	rs854786	0		0	1	1	0		0	-	E (UQ)	-	reproductive system; cellular; endocrine/exocrine gland;	-
SREBF1	6720	ENSG00000072310	protein_coding	92	rs854786	0		0	1	1	0		0	-	E (UQ)	-	liver/biliary system; mortality/aging; homeostasis/metabolism;	-
RAI1	10743	ENSG00000108557	protein_coding	92	rs854786	0		0	0	1	0		0	-	E	-	homeostasis/metabolism; craniofacial; adipose tissue; endocrine/exocrine gland; growth/size/body region; skeleton; limbs/digits/tail; nervous system; mortality/aging; behavior/neurological; respiratory system;	Smith-Magenis syndrome, 182290 (3), Isolated cases, Autosomal dominant
COPS3	8533	ENSG00000141030	protein_coding	92	rs854786	0		0	1	0	0		0	-	E (UQ)	-	mortality/aging; embryo; growth/size/body region;	-
LLGL1	3996	ENSG00000131899	protein_coding	92	rs854786	0		0	1	0	0		0	-	E	M7	mortality/aging; cardiovascular system; embryo; skeleton; nervous system; craniofacial; cellular;	-
MIEF2	125170	ENSG00000177427	protein_coding	92	rs854786	0		0	1	0	0		0	-	E	-	-	-
PEMT	10400	ENSG00000133027	protein_coding	92	rs854786	0		0	1	0	0		0	-	E (UQ)	-	homeostasis/metabolism; liver/biliary system;	-
RP11-258F1.1	-	ENSG00000266677	lncRNA	92	rs854786	0		0	1	0	0		0	-	E	-	-	-
SMCR5	140771	ENSG00000226746	lncRNA	92	rs854786	0		0	1	0	0		0	-	E	-	-	-
SMCR8	140775	ENSG00000176994	protein_coding	92	rs854786	0		0	1	0	0		0	-	E	-	cellular; immune system; homeostasis/metabolism; hematopoietic system; digestive/alimentary;	-
TOP3A	7156	ENSG00000177302	protein_coding	92	rs854786	0		0	1	0	0		0	-	E	-	cellular; mortality/aging; embryo;	Microcephaly, growth restriction, and increased sister chromatid exchange 2, 618097 (3), Autosomal recessive; ?Progressive external ophthalmoplegia with mitochondrial DNA deletions, autosomal recessive 5, 618098 (3), Autosomal recessive
TVP23B	51030	ENSG00000171928	protein_coding	92	rs854786	0		0	1	0	0		0	-	E (UQ)	-	-	-
EVI2A	2123	ENSG00000126860	protein_coding	93	rs2525570	0		1	1	1	1		0	-	E	-	-	-
EVI2B	2124	ENSG00000185862	protein_coding	93	rs2525570	0		1	1	1	1		0	-	E (UQ)	-	endocrine/exocrine gland; reproductive system; cardiovascular system; renal/urinary system;	-
NF1	4763	ENSG00000196712	protein_coding	93	rs2525570	0		1	1	1	1		0	-	E (UQ)	-	growth/size/body region; integument; endocrine/exocrine gland; muscle; craniofacial; homeostasis/metabolism; cellular; skeleton; renal/urinary system; embryo; behavior/neurological; liver/biliary system; respiratory system; cardiovascular system; hematopoietic system; mortality/aging; reproductive system; pigmentation; neoplasm; digestive/alimentary; limbs/digits/tail; hearing/vestibular/ear; ner…	Neurofibromatosis-Noonan syndrome, 601321 (3), Autosomal dominant; Leukemia, juvenile myelomonocytic, 607785 (3), Autosomal dominant, Somatic mutation; Neurofibromatosis, familial spinal, 162210 (3), Autosomal dominant; Watson syndrome, 193520 (3), Autosomal dominant; Neurofibromatosis, type 1, 162200 (3), Autosomal dominant
OMG	4974	ENSG00000126861	protein_coding	93	rs2525570	0		1	1	1	1		0	-	E	-	homeostasis/metabolism;	-
RAB11FIP4	84440	ENSG00000131242	protein_coding	93	rs2525570	1		1	1	1	1		0	-	E (UQ)	M4_hub	behavior/neurological;	-
CTD-2370N5.3	-	ENSG00000265118	protein_coding	93	rs2525570	0		1	1	1	0		0	-	E	-	-	-
RP11-142O6.1	-	ENSG00000266371	lncRNA	93	rs2525570	0		1	1	0	0		0	-	E	-	-	-
RP11-848P1.5	-	ENSG00000264107	lncRNA	93	rs2525570	0		1	1	0	0		0	-	E	M7	-	-
MIR4733	100616266	ENSG00000265444	miRNA	93	rs2525570	0		1	0	0	0		0	-	NE	-	-	-
AC006050.2	-	ENSG00000231421	lncRNA	93	rs2525570	0		0	1	0	0		0	-	NE	-	-	-
CTD-2349P21.10	-	ENSG00000265791	lncRNA	93	rs2525570	0		0	1	0	0		0	-	NE	-	-	-
PRKCA	5578	ENSG00000154229	protein_coding	94	rs4423457	0		1	1	0	0		0	-	E (UQ)	-	cellular; homeostasis/metabolism; muscle; adipose tissue; integument; neoplasm; cardiovascular system;	Pituitary tumor, invasive (3)
APOH	350	ENSG00000091583	protein_coding	94	rs4423457	0		1	0	0	0		0	-	E	-	mortality/aging; homeostasis/metabolism;	-
CACNG5	27091	ENSG00000075429	protein_coding	94	rs4423457	0		0	1	0	0		0	-	NE	-	-	-
KANK2	25959	ENSG00000197256	protein_coding	95	rs2421206	1		1	1	0	1		1	eQTL (rs2421206, PP=0.609)	E (UQ)	M1_hub	-	Palmoplantar keratoderma and woolly hair, 616099 (3), Autosomal recessive; Nephrotic syndrome, type 16, 617783 (3), Autosomal recessive
SPC24	147841	ENSG00000161888	protein_coding	95	rs2421206	0		1	1	1	0		0	-	E	-	-	-
ZNF404	342908	ENSG00000176222	protein_coding	96	rs8106090	0		1	1	1	1		0	-	E	M1	-	-
ZNF45	7596	ENSG00000124459	protein_coding	96	rs8106090	0		1	1	1	1		0	-	E	-	-	-
ZNF283	284349	ENSG00000167637	protein_coding	96	rs8106090	0		1	1	0	1		0	-	E	-	-	-
RP11-15A1.2	-	ENSG00000267191	lncRNA	96	rs8106090	0		1	1	0	0		0	-	NE	-	-	-
RP11-15A1.3	100505715	ENSG00000267058	lncRNA	96	rs8106090	0		1	1	0	0		0	-	E	-	-	-
LYPD5	284348	ENSG00000159871	protein_coding	96	rs8106090	0		0	1	0	1		0	-	E (UQ)	-	-	-
AC084219.4	100379224	ENSG00000186019	lncRNA	96	rs8106090	0		0	1	0	0		0	-	E	-	-	-
AC115522.3	-	ENSG00000268601	lncRNA	96	rs8106090	0		0	1	0	0		0	-	E	M7	-	-
IRGC	56269	ENSG00000124449	protein_coding	96	rs8106090	0		0	1	0	0		0	-	NE	-	-	-
KCNN4	3783	ENSG00000104783	protein_coding	96	rs8106090	0		0	1	0	0		0	-	E (UQ)	-	hematopoietic system; cardiovascular system; immune system; renal/urinary system; digestive/alimentary; endocrine/exocrine gland; homeostasis/metabolism; muscle;	Dehydrated hereditary stomatocytosis 2, 616689 (3), Autosomal dominant
RP11-15A1.7	101928063	ENSG00000266921	lncRNA	96	rs8106090	0		0	1	0	0		0	-	E	M1	-	-
SMG9	56006	ENSG00000105771	protein_coding	96	rs8106090	0		0	1	0	0		0	-	E (UQ)	-	vision/eye; limbs/digits/tail; hearing/vestibular/ear; nervous system; skeleton; renal/urinary system; immune system; liver/biliary system; respiratory system; embryo; cardiovascular system; mortality/aging; craniofacial; muscle; homeostasis/metabolism; endocrine/exocrine gland; growth/size/body region;	Heart and brain malformation syndrome, 616920 (3), Autosomal recessive
ZNF112	7771	ENSG00000062370	protein_coding	96	rs8106090	0		0	1	0	0		0	-	E	-	-	-
ZNF155	7711	ENSG00000204920	protein_coding	96	rs8106090	0		0	1	0	0		0	-	E	-	-	-
ZNF221	7638	ENSG00000159905	protein_coding	96	rs8106090	0		0	1	0	0		0	-	E	-	-	-
ZNF223	7766	ENSG00000267022	protein_coding	96	rs8106090	0		0	1	0	0		0	-	E	M1	-	-
ZNF224	7767	ENSG00000267680	protein_coding	96	rs8106090	0		0	1	0	0		0	-	E	-	-	-
ZNF230	7773	ENSG00000159882	protein_coding	96	rs8106090	0		0	1	0	0		0	-	E	-	-	-
ZNF284	342909	ENSG00000186026	protein_coding	96	rs8106090	0		0	1	0	0		0	-	E	M1	-	-
RBM38	55544	ENSG00000132819	protein_coding	97	rs34161672	1		0	1	0	1		0	eQTL (rs34161672, PP=0.660)	E	-	skeleton; immune system; neoplasm; mortality/aging; hematopoietic system; liver/biliary system; homeostasis/metabolism; adipose tissue; integument; growth/size/body region;	-
RAB22A	57403	ENSG00000124209	protein_coding	97	rs34161672	0		0	1	0	0		0	-	E (UQ)	-	-	-
RP5-1043L13.1	284757	ENSG00000228340	lncRNA	98	rs35384758	0		1	0	0	1		0	-	E	-	-	-
MIR4533	100616362	ENSG00000266140	miRNA	98	rs35384758	0		1	0	0	0		0	-	NE	-	-	-
BACH1	571	ENSG00000156273	protein_coding	99	rs2832279	0		1	1	1	1		0	-	E (UQ)	-	behavior/neurological; cardiovascular system; mortality/aging; muscle; homeostasis/metabolism; cellular;	-
MAP3K7CL	56911	ENSG00000156265	protein_coding	99	rs2832279	0		1	1	1	1		0	-	E	M1	-	-
BACH1-IT1	-	ENSG00000248476	lncRNA	99	rs2832279	0		1	1	0	1		0	-	E	M1	-	-
CCT8	10694	ENSG00000156261	protein_coding	99	rs2832279	0		1	1	0	1		0	-	E (UQ)	-	-	-
LINC00189	193629	ENSG00000215533	lncRNA	99	rs2832279	0		1	1	0	1		0	-	E	-	-	-
RWDD2B	10069	ENSG00000156253	protein_coding	99	rs2832279	0		1	1	0	1		0	-	E (UQ)	-	-	-
USP16	10600	ENSG00000156256	protein_coding	99	rs2832279	0		1	0	0	1		0	-	E (UQ)	-	mortality/aging;	-
AF124730.4	-	ENSG00000224649	lncRNA	99	rs2832279	0		1	1	0	0		0	-	NE	-	-	-
BACH1-AS1	106478962	ENSG00000232118	lncRNA	99	rs2832279	0		1	1	0	0		0	-	E	-	-	-
BACH1-IT2	100874322	ENSG00000228817	lncRNA	99	rs2832279	0		1	1	0	0		0	-	E	M7	-	-
LTN1	26046	ENSG00000198862	protein_coding	99	rs2832279	0		1	1	0	0		0	-	E	-	nervous system; mortality/aging; behavior/neurological; muscle; growth/size/body region;	-
U3	-	ENSG00000212479	snoRNA	99	rs2832279	0		1	1	0	0		0	-	NE	-	-	-
AF129075.5	-	ENSG00000231125	lncRNA	99	rs2832279	0		1	0	0	0		0	-	NE	-	-	-
AP000240.9	-	ENSG00000273017	lncRNA	99	rs2832279	0		1	0	0	0		0	-	E	-	-	-
RP1-100J12.1	-	ENSG00000273254	lncRNA	99	rs2832279	0		1	0	0	0		0	-	E	M7	-	-
AF131217.1	-	ENSG00000232855	lncRNA	99	rs2832279	0		0	1	0	0		0	-	E	M1	-	-
AL035610.2	101927973	ENSG00000236532	lncRNA	99	rs2832279	0		0	1	0	0		0	-	E	-	-	-
GRIK1	2897	ENSG00000171189	protein_coding	99	rs2832279	0		0	1	0	0		0	-	E	M1	adipose tissue; integument; growth/size/body region; homeostasis/metabolism; behavior/neurological; hematopoietic system; nervous system;	-
GRIK1-AS1	642976	ENSG00000174680	lncRNA	99	rs2832279	0		0	1	0	0		0	-	E	M1	-	-
LINC00161	118421	ENSG00000226935	lncRNA	99	rs2832279	0		0	1	0	0		0	-	E	-	-	-
N6AMT1	29104	ENSG00000156239	protein_coding	99	rs2832279	0		0	1	0	0		0	-	E	-	growth/size/body region; embryo; mortality/aging;	-
AP1B1	162	ENSG00000100280	protein_coding	100	rs174767	0		1	1	1	1		0	-	E (UQ)	-	growth/size/body region; cellular; skeleton; respiratory system; cardiovascular system; hematopoietic system; immune system;	Keratitis-ichthyosis-deafness syndrome, autosomal recessive, 242150 (3), Autosomal recessive
GAS2L1	10634	ENSG00000185340	protein_coding	100	rs174767	0		1	1	1	1		0	-	E	-	reproductive system;	-
EWSR1	2130	ENSG00000182944	protein_coding	100	rs174767	0		1	0	1	1		0	-	E (UQ)	-	endocrine/exocrine gland; growth/size/body region; immune system; homeostasis/metabolism; behavior/neurological; neoplasm; hematopoietic system; mortality/aging; limbs/digits/tail; skeleton;	Neuroepithelioma, 612219 (3); Ewing sarcoma, 612219 (3)
RASL10A	10633	ENSG00000100276	protein_coding	100	rs174767	0		1	1	0	1		0	-	E	M1	-	-
RHBDD3	25807	ENSG00000100263	protein_coding	100	rs174767	0		1	1	0	0		0	-	E	-	homeostasis/metabolism; cellular; hematopoietic system; mortality/aging; liver/biliary system; immune system;	-
SNORD125	100113380	ENSG00000239127	snoRNA	100	rs174767	0		1	1	0	0		0	-	NE	-	-	-
AC002059.10	-	ENSG00000273216	lncRNA	100	rs174767	0		1	0	0	0		0	-	E	-	-	-
CTA-984G1.5	-	ENSG00000237015	lncRNA	100	rs174767	0		0	1	0	0		0	-	NE	-	-	-
EMID1	129080	ENSG00000186998	protein_coding	100	rs174767	0		0	1	0	0		0	-	E	-	homeostasis/metabolism;	-
KREMEN1	83999	ENSG00000183762	protein_coding	100	rs174767	0		0	1	0	0		0	-	E (UQ)	M7	-	Ectodermal dysplasia 13, hair/tooth type, 617392 (3), Autosomal recessive
NIPSNAP1	8508	ENSG00000184117	protein_coding	100	rs174767	0		0	1	0	0		0	-	E	-	hematopoietic system; behavior/neurological; homeostasis/metabolism; integument;	-
RFPL1S	10740	ENSG00000225465	lncRNA	100	rs174767	0		0	1	0	0		0	-	E	-	-	-
SRPX	8406	ENSG00000101955	protein_coding	101	rs35318931	1		1	1	1	0		0	coding variant & eQTL (rs35318931, PP=0.873)	E (UQ)	M1	endocrine/exocrine gland; neoplasm; immune system; respiratory system; liver/biliary system; hematopoietic system;	-
SYTL5	94122	ENSG00000147041	protein_coding	101	rs35318931	0		1	0	0	0		0	-	E	M4	-	-
TM4SF2	7102	ENSG00000250349	protein_coding	101	rs35318931	0		1	0	0	0		0	-	E	-	-	-
CHRDL1	91851	ENSG00000101938	protein_coding	102	rs5942977	1		1	1	1	0		0	-	E (UQ)	M1_hub	nervous system; behavior/neurological; homeostasis/metabolism;	Megalocornea 1, X-linked, 309300 (3), X-linked recessive
RGAG1	57529	ENSG00000243978	protein_coding	102	rs5942977	0		1	1	0	0		0	-	E	M1	-	-
AMMECR1	9949	ENSG00000101935	protein_coding	102	rs5942977	0		1	0	0	0		0	-	E	M7	-	Midface hypoplasia, hearing impairment, elliptocytosis, and nephrocalcinosis, 300990 (3), X-linked recessive
ABHD12	-	ENSG00000100997	protein_coding	-	-	0		0	0	1	0		0	-	E (UQ)	M4	hearing/vestibular/ear; nervous system; immune system; behavior/neurological; hematopoietic system; muscle; homeostasis/metabolism;	Polyneuropathy, hearing loss, ataxia, retinitis pigmentosa, and cataract, 612674 (3), Autosomal recessive
AKT3	-	ENSG00000117020	protein_coding	-	-	1		0	0	1	0		0	-	E (UQ)	M1_hub	cellular; homeostasis/metabolism; behavior/neurological; nervous system;	Megalencephaly-polymicrogyria-polydactyly-hydrocephalus syndrome 2, 615937 (3), Autosomal dominant
ALKBH4	-	ENSG00000160993	protein_coding	-	-	0		0	0	1	0		0	-	E	-	cellular; mortality/aging;	-
ANKRA2	-	ENSG00000164331	protein_coding	-	-	0		0	0	1	0		0	-	E (UQ)	-	-	-
ANKRD44	-	ENSG00000065413	protein_coding	-	-	0		0	0	1	0		0	-	E	M1	-	-
ARIH2	-	ENSG00000177479	protein_coding	-	-	0		0	0	1	0		0	-	E (UQ)	-	integument; growth/size/body region; endocrine/exocrine gland; cellular; homeostasis/metabolism; skeleton; renal/urinary system; embryo; respiratory system; liver/biliary system; behavior/neurological; reproductive system; mortality/aging; cardiovascular system; nervous system; immune system;	-
ASIC4	-	ENSG00000072182	protein_coding	-	-	0		0	0	1	0		0	-	E	-	nervous system; reproductive system;	-
BAG1	-	ENSG00000107262	protein_coding	-	-	0		0	0	1	0		0	-	E (UQ)	M4	liver/biliary system; mortality/aging; hematopoietic system;	-
BCL11A	-	ENSG00000119866	protein_coding	-	-	0		0	0	1	0		0	-	E	M4	nervous system; immune system; mortality/aging; hematopoietic system; cellular; homeostasis/metabolism; endocrine/exocrine gland;	Dias-Logan syndrome, 617101 (3), Autosomal dominant
BOK	-	ENSG00000176720	protein_coding	-	-	0		0	0	1	0		0	-	E (UQ)	-	immune system; behavior/neurological; hematopoietic system; endocrine/exocrine gland;	-
C14orf93	-	ENSG00000100802	protein_coding	-	-	0		0	0	1	0		0	-	E	-	endocrine/exocrine gland; homeostasis/metabolism;	-
C16orf70	-	ENSG00000125149	protein_coding	-	-	0		0	0	1	0		0	-	E	M7	-	-
CBFB	-	ENSG00000067955	protein_coding	-	-	0		0	0	1	0		0	-	E (UQ)	-	skeleton; immune system; vision/eye; digestive/alimentary; limbs/digits/tail; nervous system; cardiovascular system; hematopoietic system; mortality/aging; liver/biliary system; respiratory system; embryo; homeostasis/metabolism; cellular; craniofacial; endocrine/exocrine gland; growth/size/body region; integument;	Myeloid leukemia, acute, M4/M4Eo subtype, somatic, 601626 (1)
CCDC36	-	ENSG00000173421	protein_coding	-	-	0		0	0	1	0		0	-	E	-	-	-
CCNE1	-	ENSG00000105173	protein_coding	-	-	0		0	0	1	0		0	-	E	-	hematopoietic system; digestive/alimentary; immune system; skeleton; integument; endocrine/exocrine gland; cellular;	-
CD109	-	ENSG00000156535	protein_coding	-	-	0		0	0	1	0		0	-	E (UQ)	-	endocrine/exocrine gland; integument; immune system;	-
CDKN1A	-	ENSG00000124762	protein_coding	-	-	0		0	0	1	0		0	-	E (UQ)	-	adipose tissue; endocrine/exocrine gland; integument; growth/size/body region; craniofacial; cellular; immune system; homeostasis/metabolism; respiratory system; liver/biliary system; neoplasm; mortality/aging; reproductive system; hematopoietic system; cardiovascular system; nervous system; digestive/alimentary; skeleton; renal/urinary system;	-
CHPF	-	ENSG00000123989	protein_coding	-	-	0		0	0	1	0		0	-	E (UQ)	-	limbs/digits/tail; skeleton; behavior/neurological; growth/size/body region; homeostasis/metabolism;	-
CMSS1	-	ENSG00000184220	protein_coding	-	-	0		0	0	1	0		0	-	E (UQ)	M1	-	-
CRB1	-	ENSG00000134376	protein_coding	-	-	0		0	0	1	0		0	-	E	-	homeostasis/metabolism; cardiovascular system; mortality/aging; pigmentation; nervous system; vision/eye;	Pigmented paravenous chorioretinal atrophy, 172870 (3), Autosomal dominant; Retinitis pigmentosa-12, 600105 (3), Autosomal recessive; Leber congenital amaurosis 8, 613835 (3), Autosomal recessive
CSPG4	-	ENSG00000173546	protein_coding	-	-	0		0	0	1	0		0	-	E	M1	nervous system; immune system; liver/biliary system; hematopoietic system; adipose tissue; homeostasis/metabolism; cellular; growth/size/body region;	-
CSRP1	-	ENSG00000159176	protein_coding	-	-	0		0	0	1	0		0	-	E (UQ)	M1	cardiovascular system; homeostasis/metabolism;	-
CUL9	-	ENSG00000112659	protein_coding	-	-	0		0	0	1	0		0	-	E (UQ)	-	liver/biliary system; respiratory system; neoplasm; reproductive system; mortality/aging; nervous system; cellular; homeostasis/metabolism; endocrine/exocrine gland; growth/size/body region;	-
DHX57	-	ENSG00000163214	protein_coding	-	-	0		0	0	1	0		0	-	E	-	-	-
ENTPD6	-	ENSG00000197586	protein_coding	-	-	0		0	0	1	0		0	-	E (UQ)	-	adipose tissue; growth/size/body region; skeleton; limbs/digits/tail;	-
ERLEC1	-	ENSG00000068912	protein_coding	-	-	0		0	0	1	0		0	-	E (UQ)	-	nervous system; hearing/vestibular/ear; behavior/neurological; homeostasis/metabolism;	-
ESRRG	-	ENSG00000196482	protein_coding	-	-	0		0	0	1	0		0	-	E	-	growth/size/body region; cellular; homeostasis/metabolism; renal/urinary system; behavior/neurological; mortality/aging; cardiovascular system; hearing/vestibular/ear;	-
EVX2	-	ENSG00000174279	protein_coding	-	-	0		0	0	1	0		0	-	E	-	growth/size/body region; limbs/digits/tail; reproductive system; skeleton;	-
FILIP1L	-	ENSG00000168386	protein_coding	-	-	0		0	0	1	0		0	-	E (UQ)	M1	-	-
FOXP2	-	ENSG00000128573	protein_coding	-	-	0		0	0	1	0		0	-	E (UQ)	M1	craniofacial; cellular; homeostasis/metabolism; growth/size/body region; adipose tissue; nervous system; hearing/vestibular/ear; vision/eye; immune system; behavior/neurological; respiratory system; mortality/aging; hematopoietic system; cardiovascular system;	Speech-language disorder-1, 602081 (3), Autosomal dominant
GABBR1	-	ENSG00000204681	protein_coding	-	-	0		0	0	1	0		0	-	E (UQ)	M1	nervous system; behavior/neurological; mortality/aging; reproductive system; adipose tissue; homeostasis/metabolism; integument; growth/size/body region;	-
GFRA1	-	ENSG00000151892	protein_coding	-	-	0		0	0	1	0		0	-	E	-	integument; cellular; nervous system; muscle; digestive/alimentary; mortality/aging; embryo; renal/urinary system; immune system;	-
GINS1	-	ENSG00000101003	protein_coding	-	-	0		0	0	1	0		0	-	E	-	embryo; mortality/aging; cellular;	Immunodeficiency 55, 617827 (3), Autosomal recessive
GPR139	-	ENSG00000180269	protein_coding	-	-	0		0	0	1	0		0	-	E	-	cardiovascular system;	-
GPR75-ASB3	-	ENSG00000115239	protein_coding	-	-	0		0	0	1	0		0	-	E	M1	-	-
HEY2	-	ENSG00000135547	protein_coding	-	-	0		0	0	1	0		0	-	E	M1	homeostasis/metabolism; muscle; growth/size/body region; cardiovascular system; mortality/aging; respiratory system; liver/biliary system;	-
HLCS	-	ENSG00000159267	protein_coding	-	-	0		0	0	1	0		0	-	E	M4	mortality/aging; embryo; growth/size/body region;	Holocarboxylase synthetase deficiency, 253270 (3), Autosomal recessive
HSPG2	-	ENSG00000142798	protein_coding	-	-	0		0	0	1	0		0	-	E (UQ)	M1	growth/size/body region; integument; craniofacial; muscle; homeostasis/metabolism; immune system; cellular; behavior/neurological; respiratory system; liver/biliary system; embryo; cardiovascular system; hematopoietic system; mortality/aging; vision/eye; digestive/alimentary; nervous system; hearing/vestibular/ear; limbs/digits/tail; skeleton;	Dyssegmental dysplasia, Silverman-Handmaker type, 224410 (3), Autosomal recessive; Schwartz-Jampel syndrome, type 1, 255800 (3), Autosomal recessive
IQCK	-	ENSG00000174628	protein_coding	-	-	0		0	0	1	0		0	-	E	-	-	-
KCNK2	-	ENSG00000082482	protein_coding	-	-	0		0	0	1	0		0	-	E	-	behavior/neurological; mortality/aging; nervous system; homeostasis/metabolism;	-
KCTD19	-	ENSG00000168676	protein_coding	-	-	0		0	0	1	0		0	-	E	-	-	-
KIAA0040	-	ENSG00000235750	protein_coding	-	-	0		0	0	1	0		0	-	E (UQ)	-	-	-
KIAA0408	-	ENSG00000189367	protein_coding	-	-	1		0	0	1	0		0	-	E	M1_hub	-	-
LBH	-	ENSG00000213626	protein_coding	-	-	0		0	0	1	0		0	-	E (UQ)	M1	integument; endocrine/exocrine gland; reproductive system;	-
MAPRE2	-	ENSG00000166974	protein_coding	-	-	0		0	0	1	0		0	-	E (UQ)	-	-	Symmetric circumferential skin creases, congenital, 2, 616734 (3), Autosomal dominant
MECOM	-	ENSG00000085276	protein_coding	-	-	0		0	0	1	0		0	-	E (UQ)	-	immune system; skeleton; hearing/vestibular/ear; nervous system; limbs/digits/tail; hematopoietic system; cardiovascular system; mortality/aging; reproductive system; embryo; behavior/neurological; respiratory system; liver/biliary system; homeostasis/metabolism; cellular; muscle; craniofacial; growth/size/body region; integument;	Radioulnar synostosis with amegakaryocytic thrombocytopenia 2, 616738 (3), Autosomal dominant
MOB4	-	ENSG00000115540	protein_coding	-	-	0		0	0	1	0		0	-	E (UQ)	-	-	-
MOV10	-	ENSG00000155363	protein_coding	-	-	0		0	0	1	0		0	-	E (UQ)	M7	nervous system; mortality/aging; behavior/neurological;	-
MSRA	-	ENSG00000175806	protein_coding	-	-	0		0	0	1	0		0	-	E (UQ)	-	mortality/aging; behavior/neurological; homeostasis/metabolism; cellular;	-
NDP	4693	ENSG00000124479	protein_coding	-	-	0		0	0	1	0		0	-	E	M1	cardiovascular system; pigmentation; nervous system; hearing/vestibular/ear; vision/eye; skeleton;	Exudative vitreoretinopathy 2, X-linked, 305390 (3), X-linked recessive, X-linked dominant; Norrie disease, 310600 (3), X-linked recessive
NEGR1	-	ENSG00000172260	protein_coding	-	-	1		0	0	1	0		0	-	E	M1_hub	reproductive system; hematopoietic system; cardiovascular system; behavior/neurological; liver/biliary system; immune system; skeleton; vision/eye; growth/size/body region; endocrine/exocrine gland; homeostasis/metabolism;	-
NFIX	-	ENSG00000008441	protein_coding	-	-	0		0	0	1	0		0	-	E (UQ)	-	skeleton; immune system; vision/eye; hearing/vestibular/ear; nervous system; digestive/alimentary; mortality/aging; hematopoietic system; behavior/neurological; homeostasis/metabolism; craniofacial; adipose tissue; growth/size/body region;	Marshall-Smith syndrome, 602535 (3), Autosomal dominant; Sotos syndrome 2, 614753 (3), Autosomal dominant
NMB	-	ENSG00000197696	protein_coding	-	-	0		0	0	1	0		0	-	E	-	behavior/neurological; nervous system;	-
NPC1L1	-	ENSG00000015520	protein_coding	-	-	0		0	0	1	0		0	-	E	M4	liver/biliary system; digestive/alimentary; growth/size/body region; homeostasis/metabolism;	[Low density lipoprotein cholesterol level QTL 7], 617966 (3); [Ezetimibe, nonresponse to], 617966 (3)
NUDT5	-	ENSG00000165609	protein_coding	-	-	0		0	0	1	0		0	-	E (UQ)	-	-	-
OBSL1	-	ENSG00000124006	protein_coding	-	-	0		0	0	1	0		0	-	E	M1	-	3-M syndrome 2, 612921 (3), Autosomal recessive
OSBPL2	-	ENSG00000130703	protein_coding	-	-	0		0	0	1	0		0	-	E (UQ)	M4	-	Deafness, autosomal dominant 67, 616340 (3), Autosomal dominant
PARD3	-	ENSG00000148498	protein_coding	-	-	0		0	0	1	0		0	-	E (UQ)	M7	embryo; neoplasm; pigmentation; mortality/aging; hematopoietic system; cardiovascular system; vision/eye; limbs/digits/tail; nervous system; homeostasis/metabolism; integument; growth/size/body region;	-
PBX1	-	ENSG00000185630	protein_coding	-	-	0		0	0	1	0		0	-	E (UQ)	-	integument; growth/size/body region; endocrine/exocrine gland; muscle; craniofacial; cellular; homeostasis/metabolism; renal/urinary system; skeleton; embryo; behavior/neurological; respiratory system; liver/biliary system; mortality/aging; reproductive system; hematopoietic system; cardiovascular system; hearing/vestibular/ear; limbs/digits/tail; digestive/alimentary; immune system;	Congenital anomalies of kidney and urinary tract syndrome with or without hearing loss, abnormal ears, or developmental delay, 617641 (3), Autosomal dominant
PLEKHG4	-	ENSG00000196155	protein_coding	-	-	0		0	0	1	0		0	-	E	-	-	-
PLOD2	-	ENSG00000152952	protein_coding	-	-	0		0	0	1	0		0	-	E (UQ)	-	mortality/aging;	Bruck syndrome 2, 609220 (3), Autosomal recessive
PRDM6	-	ENSG00000061455	protein_coding	-	-	1		0	0	1	0		0	-	E	M1_hub	mortality/aging; cardiovascular system; respiratory system; embryo; muscle; integument; homeostasis/metabolism;	Patent ductus arteriosus 3, 617039 (3), Autosomal dominant
PRKAR2A	-	ENSG00000114302	protein_coding	-	-	0		0	0	1	0		0	-	E (UQ)	M4	-	-
PSME4	-	ENSG00000068878	protein_coding	-	-	0		0	0	1	0		0	-	E (UQ)	-	cellular; reproductive system;	-
PSPC1	-	ENSG00000121390	protein_coding	-	-	0		0	0	1	0		0	-	E (UQ)	-	-	-
PYGB	-	ENSG00000100994	protein_coding	-	-	0		0	0	1	0		0	-	E (UQ)	M4	-	-
QARS	-	ENSG00000172053	protein_coding	-	-	0		0	0	1	0		0	-	E (UQ)	M4	-	-
QRICH1	-	ENSG00000198218	protein_coding	-	-	0		0	0	1	0		0	-	E (UQ)	M1	cardiovascular system; hematopoietic system; digestive/alimentary; renal/urinary system; immune system; endocrine/exocrine gland; growth/size/body region; craniofacial; muscle;	Ververi-Brady syndrome, 617982 (3), Autosomal dominant
RAD51B	-	ENSG00000182185	protein_coding	-	-	0		0	0	1	0		0	-	E	M7	mortality/aging;	-
RASA2	-	ENSG00000155903	protein_coding	-	-	0		0	0	1	0		0	-	E	-	-	-
SCARA5	-	ENSG00000168079	protein_coding	-	-	0		0	0	1	0		0	-	E (UQ)	M1	integument; adipose tissue; endocrine/exocrine gland; immune system; renal/urinary system; liver/biliary system; respiratory system; reproductive system;	-
SEC11A	-	ENSG00000140612	protein_coding	-	-	0		0	0	1	0		0	-	E (UQ)	-	-	-
SEC61A2	-	ENSG00000065665	protein_coding	-	-	0		0	0	1	0		0	-	E	-	-	-
SLC25A20	-	ENSG00000178537	protein_coding	-	-	0		0	0	1	0		0	-	E (UQ)	-	homeostasis/metabolism; endocrine/exocrine gland; cardiovascular system; mortality/aging; nervous system; renal/urinary system; liver/biliary system; embryo;	Carnitine-acylcarnitine translocase deficiency, 212138 (3), Autosomal recessive
SLC35F3	-	ENSG00000183780	protein_coding	-	-	0		0	0	1	0		0	-	E	-	-	-
SLC9A5	-	ENSG00000135740	protein_coding	-	-	0		0	0	1	0		0	-	E	-	-	-
SNTG1	-	ENSG00000147481	protein_coding	-	-	0		0	0	1	0		0	-	E	M1	-	-
SOGA3	-	ENSG00000214338	protein_coding	-	-	0		0	0	1	0		0	-	E	M1	-	-
SOGA3	-	ENSG00000255330	protein_coding	-	-	1		0	0	1	0		0	-	E	M1_hub	-	-
TMEM198	-	ENSG00000188760	protein_coding	-	-	0		0	0	1	0		0	-	E	M1	-	-
TTC31	-	ENSG00000115282	protein_coding	-	-	0		0	0	1	0		0	-	E (UQ)	M1	-	-
WDR70	-	ENSG00000082068	protein_coding	-	-	0		0	0	1	0		0	-	E	-	-	-
WDR73	-	ENSG00000177082	protein_coding	-	-	0		0	0	1	0		0	-	E (UQ)	-	-	Galloway-Mowat syndrome 1, 251300 (3), Autosomal recessive
XKR6	-	ENSG00000171044	protein_coding	-	-	0		0	0	1	0		0	-	E	-	-	-
ZBTB38	-	ENSG00000177311	protein_coding	-	-	0		0	0	1	0		0	-	E (UQ)	-	-	-
ZNF521	-	ENSG00000198795	protein_coding	-	-	0		0	0	1	0		0	-	E	M1	cellular; craniofacial; growth/size/body region; endocrine/exocrine gland; respiratory system; liver/biliary system; behavior/neurological; immune system; renal/urinary system; skeleton; nervous system; hematopoietic system; cardiovascular system; mortality/aging;	-
ZNF592	-	ENSG00000166716	protein_coding	-	-	0		0	0	1	0		0	-	E (UQ)	-	-	-
ZSCAN2	-	ENSG00000176371	protein_coding	-	-	0		0	0	1	0		0	-	E	-	skeleton;	-
